# Supplementary material for: Highly efficient and enantioselective synthesis of chiral lactones via Ir-catalysed asymmetric hydrogenation of ketoesters
Source: Royal Society of Chemistry journal article supplement (doi:10.1039/d2cc02069f), 2022-01-01
Supplement: d2cc02069f1.pdf [file d2cc02069f1.pdf]

## Supporting Information

### Highly Efficient and Enantioselective Synthesis of Chiral Lactones via Ir-Catalysed Asymmetric Hydrogenation of Ketoesters

Jingyuan Song,<sup>ab</sup> Congcong Yin,<sup>b</sup> Yao Zhang,<sup>b</sup> Yongjie Shi,<sup>b</sup> Yingjun Li,<sup>cd</sup> Gen-  
Qiang Chen\*<sup>d</sup> and Xumu Zhang\*<sup>bc</sup>

*chengq@sustech.edu.cn; zhangxm@sustech.edu.cn.*

<sup>a</sup> *School of Chemistry and Chemical Engineering, Harbin Institute of Technology, Harbin 150001, China.*

<sup>b</sup> *Department of Chemistry, Southern University of Science and Technology, 1088 Xueyuan Road, Shenzhen, 518055, China.*

<sup>c</sup> *Shenzhen Bay Laboratory, Shenzhen 518132, China*

<sup>d</sup> *Academy for Advanced Interdisciplinary Studies, Department of Chemistry, Southern University of Science and Technology, 1088 Xueyuan Road, Shenzhen, 518055, China.*

## Content

|                                                                                      |    |
|--------------------------------------------------------------------------------------|----|
| 1. General Information .....                                                         | 2  |
| 2. General procedure for synthesis of benzo-fused ketoesters .....                   | 3  |
| 3. General procedure for asymmetric hydrogenation of benzo-fused ketoesters .....    | 6  |
| 4. General procedure for synthesis of biaryl bridged ketoesters .....                | 14 |
| 5. General procedure for asymmetric hydrogenation of biaryl bridged ketoesters ..... | 17 |
| 6. NMR Spectra .....                                                                 | 30 |
| 7. References .....                                                                  | 67 |

## 1. General Information

Unless otherwise mentioned, all experiments and manipulations which are sensitive to moisture or air were carried out under an atmosphere of argon in a glovebox or using standard Schlenk techniques. Solvents were dried with standard procedures and degassed with N<sub>2</sub>. Flash column chromatography was performed using Tsingdao silica gel (60, particle size 200-300 mesh). NMR spectra were recorded on a Bruker DPX 400 spectrometer at 400 MHz for <sup>1</sup>H NMR, 101 MHz for <sup>13</sup>C NMR in CDCl<sub>3</sub> with tetramethylsilane (TMS) as internal standard. Data is reported as: multiplicity (s = singlet, d = doublet, t = triplet, q = quartet, m = multiplet) and chemical shifts are reported in ppm and coupling constants are given in Hz. Chemical shifts were reported relative to TMS (0.00 ppm) or CHCl<sub>3</sub> (7.26 ppm) for <sup>1</sup>H NMR and relative to CDCl<sub>3</sub> (77.0 ppm) for <sup>13</sup>C NMR. Optical rotations [ $\alpha$ ]<sub>D</sub> were determined using a PERKIN ELMER polarimeter 343 instrument. HPLC analyses were performed using Daicel chiral column on an Agilent 1260 Series HPLC instrument.

## 2. General procedure for synthesis of benzo-fused ketoesters

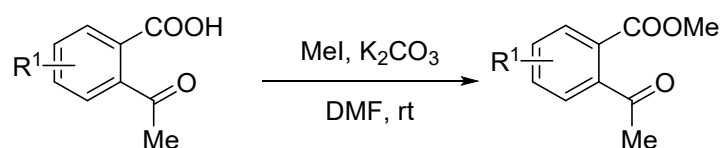

**1e** and benzo-fused ketoacids were prepared as described in the literature. The relevant data see the literature.<sup>1</sup>

Others were prepared with the following steps. MeI (3.0 equiv) was added to the stirred solution of benzo-fused ketoacids (1.0 equiv) and K<sub>2</sub>CO<sub>3</sub> (1.5 equiv) in DMF. The resulting reaction mixture was stirred in room temperature for 6 hours. After completion of the reaction, extracted with DCM and washed with water for 3 times. Organic layer was dried over anhydrous Na<sub>2</sub>SO<sub>4</sub> and concentrated under reduced pressure. The obtained residue was purified by flash chromatography on silica gel to afford **1a**, **1b**, **1c** and **1d** in 90% - 99% yield.

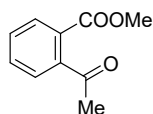

**Methyl 2-acetylbenzoate (1a)**<sup>1</sup>: <sup>1</sup>H NMR (600 MHz, CDCl<sub>3</sub>) δ 7.86 (dd, *J* = 7.7, 1.3 Hz, 1H), 7.57 (td, *J* = 7.5, 1.3 Hz, 1H), 7.51 (td, *J* = 7.6, 1.3 Hz, 1H), 7.43 (dd, *J* = 7.6, 1.3 Hz, 1H), 3.90 (s, 3H), 2.55 (s, 3H). <sup>13</sup>C NMR (151 MHz, CDCl<sub>3</sub>) δ 202.91, 167.48, 142.71, 132.05, 130.09, 129.72, 128.86, 126.51, 52.58, 29.98.

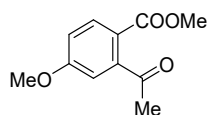

**Methyl 2-acetyl-4-methoxybenzoate (1b)**<sup>1</sup>: <sup>1</sup>H NMR (400 MHz, CDCl<sub>3</sub>) δ 7.90 (d, *J* = 8.7 Hz, 1H), 6.93 (dd, *J* = 8.7, 2.6 Hz, 1H), 6.76 (d, *J* = 2.6 Hz, 1H), 3.86 (s, 6H), 2.50 (s, 3H). <sup>13</sup>C NMR (101 MHz, CDCl<sub>3</sub>) δ 204.01, 166.31, 162.88, 146.58, 132.29, 119.48, 114.48, 111.32, 55.68, 52.24, 30.69.

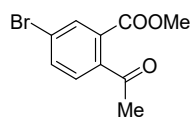

**Methyl 2-acetyl-5-bromobenzoate (1c)** <sup>1</sup>: <sup>1</sup>H NMR (600 MHz, CDCl<sub>3</sub>) δ 7.97 (s, 1H), 7.70 (d, *J* = 8.2 Hz, 1H), 7.32 (d, *J* = 8.2 Hz, 1H), 3.91 (s, 3H), 2.53 (s, 3H). <sup>13</sup>C NMR (151 MHz, CDCl<sub>3</sub>) δ 201.52, 166.26, 141.01, 134.91, 132.68, 130.87, 128.20, 124.45, 52.89, 29.78.

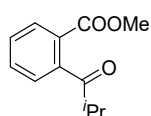

**Methyl 2-isobutyrylbenzoate (1d)** <sup>1</sup>: <sup>1</sup>H NMR (600 MHz, CDCl<sub>3</sub>) δ 7.93 (t, *J* = 6.5 Hz, 1H), 7.56 (t, *J* = 6.8 Hz, 1H), 7.49 (t, *J* = 6.7 Hz, 1H), 7.31 (t, *J* = 7.0 Hz, 1H), 3.88 (s, 3H), 3.12 – 3.01 (m, 1H), 1.23 – 1.16 (m, 6H). <sup>13</sup>C NMR (151 MHz, CDCl<sub>3</sub>) δ 210.17, 166.98, 143.12, 132.16, 130.10, 129.49, 128.39, 126.81, 52.56, 40.73, 18.52.

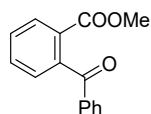

**Methyl 2-benzoylbenzoate (1f)** <sup>1</sup>: <sup>1</sup>H NMR (400 MHz, CDCl<sub>3</sub>) δ 8.05 (dd, *J* = 7.6, 1.1 Hz, 1H), 7.75 (dd, *J* = 8.4, 1.4 Hz, 2H), 7.65 (td, *J* = 7.5, 1.4 Hz, 1H), 7.60 – 7.53 (m, 2H), 7.47 – 7.39 (m, 3H), 3.61 (s, 3H). <sup>13</sup>C NMR (101 MHz, CDCl<sub>3</sub>) δ 197.17, 166.54, 141.82, 137.33, 133.21, 132.55, 130.23, 129.77, 129.39, 128.65, 127.94, 52.31.

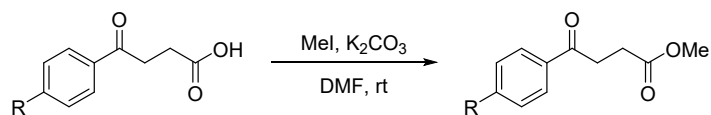

Compound **1g** was commercially available. Others are prepared with the following steps. MeI (3.0 equiv) was added to the stirred solution of  $\gamma$ -ketoacids (1.0 equiv) and K<sub>2</sub>CO<sub>3</sub> (1.5 equiv) in DMF. The resulting reaction mixture was stirred in room temperature for 6 hours. After completion of the reaction, extracted with DCM and washed with water for 3 times. Organic layer was dried over anhydrous Na<sub>2</sub>SO<sub>4</sub>

and concentrated under reduced pressure. The obtained residue was purified by flash chromatography on silica gel to afford **1h**, **1i** and **1j** in 92% - 99% yield.

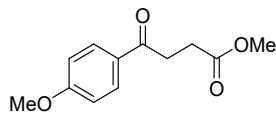

**Methyl 4-(4-methoxyphenyl)-4-oxobutanoate (1h)**<sup>2</sup>: <sup>1</sup>H NMR (400 MHz, CDCl<sub>3</sub>) δ 7.93 (d, *J* = 8.9 Hz, 2H), 6.90 (d, *J* = 8.9 Hz, 2H), 3.83 (s, 3H), 3.67 (s, 3H), 3.24 (t, *J* = 6.7 Hz, 2H), 2.72 (t, *J* = 6.7 Hz, 2H). <sup>13</sup>C NMR (101 MHz, CDCl<sub>3</sub>) δ 196.56, 173.50, 163.58, 130.28, 129.62, 113.74, 55.46, 51.78, 33.00, 28.10.

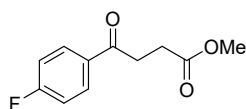

**Methyl 4-(4-fluorophenyl)-4-oxobutanoate (1i)**<sup>2</sup>: <sup>1</sup>H NMR (400 MHz, CDCl<sub>3</sub>) δ 7.97 (dd, *J* = 8.7, 5.6 Hz, 2H), 7.09 (t, *J* = 8.6 Hz, 2H), 3.66 (s, 3H), 3.25 (t, *J* = 6.6 Hz, 2H), 2.72 (t, *J* = 6.6 Hz, 2H). <sup>13</sup>C NMR (101 MHz, CDCl<sub>3</sub>) δ 196.46, 173.27, 167.06, 164.53, 132.99, 132.96, 130.70, 130.61, 115.80, 115.58, 51.81, 33.25, 27.93.

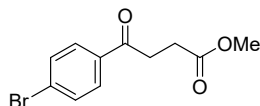

**Methyl 4-(4-bromophenyl)-4-oxobutanoate (1j)**<sup>2</sup>: <sup>1</sup>H NMR (400 MHz, CDCl<sub>3</sub>) δ 7.83 (d, *J* = 8.6 Hz, 2H), 7.60 (d, *J* = 8.6 Hz, 2H), 3.69 (s, 3H), 3.26 (t, *J* = 6.6 Hz, 2H), 2.75 (t, *J* = 6.6 Hz, 2H). <sup>13</sup>C NMR (101 MHz, CDCl<sub>3</sub>) δ 197.08, 173.23, 135.25, 131.96, 129.57, 128.44, 51.90, 33.34, 27.92.

### 3. General procedure for asymmetric hydrogenation of benzo-fused ketoesters

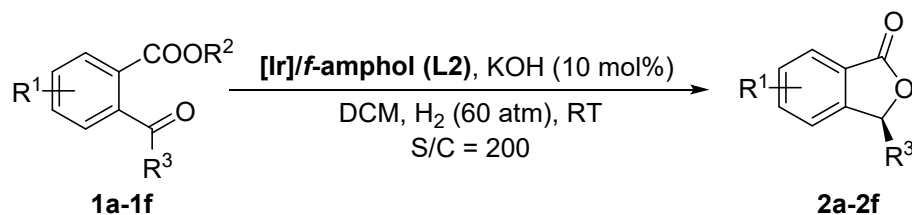

To a 4.0 mL vial was added the catalyst precursor  $[\text{Ir}(\text{COD})\text{Cl}]_2$  (6.72 mg,  $1.0 \times 10^{-2}$  mmol), ligand ( $R_C, S_C, R_C, S_{FC}$ )-*f*-amphol (16.9 mg,  $2.2 \times 10^{-2}$  mmol) and anhydrous DCM (2.0 mL) in the argon-filled glovebox. The mixture was stirred for 2.0 h at 25 °C giving orange solution. And then 0.1 mmol of benzo-fused ketoesters, KOH (0.56 mg, 0.01 mmol) were added into a 5 mL hydrogenation vessel. 1.0 mL anhydrous DCM was added as solvent and a solution of Ir/( $R_C, S_C, R_C, S_{FC}$ )-*f*-amphol in anhydrous DCM (50  $\mu\text{L}$ ) was added via an injection port. Then the vessel was placed in an autoclave, closed it and moved it out from glovebox. The autoclave quickly purged with hydrogen gas for three times, then pressurized to 60 atm  $\text{H}_2$ . The reaction solution was stirred at room temperature (25 °C - 30 °C) until for 24 h, then released pressure carefully. DCM was removed under reduced pressure. The solution of reaction mixture was purified by a flash chromatography on a silica gel with ethyl acetate and the solvent was removed under reduced pressure. The ee value were determined by chiral HPLC analysis of the hydrogenation product chiral lactones directly. The absolute configurations of chiral lactones were assigned by analogy.

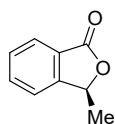

**(S)-3-methylisobenzofuran-1(3H)-one (2a)**<sup>1</sup>: 99% yield, 98% ee. <sup>1</sup>H NMR (400 MHz,  $\text{CDCl}_3$ )  $\delta$  7.90 (d,  $J = 7.7$  Hz, 1H), 7.68 (t,  $J = 7.5$  Hz, 1H), 7.53 (t,  $J = 7.5$  Hz, 1H), 7.44 (d,  $J = 7.6$  Hz, 1H), 5.57 (q,  $J = 6.7$  Hz, 1H), 1.64 (d,  $J = 6.7$  Hz, 3H). <sup>13</sup>C NMR (101 MHz,  $\text{CDCl}_3$ )  $\delta$  170.49, 151.20, 134.05, 129.08, 125.82, 125.73, 121.54,

77.75, 20.41. **Optical Rotation:**  $[\alpha]_D^{22} = -8.2$  ( $c = 0.73$ , MeOH). The enantiomeric excess was determined by HPLC on Chiral OJ-3 column, 220 nm, 25 °C, n-hexane: i-PrOH = 90:10; flow 1.0 mL/min;  $t_R$  (major) = 12.83 min; (minor) = 14.71 min.

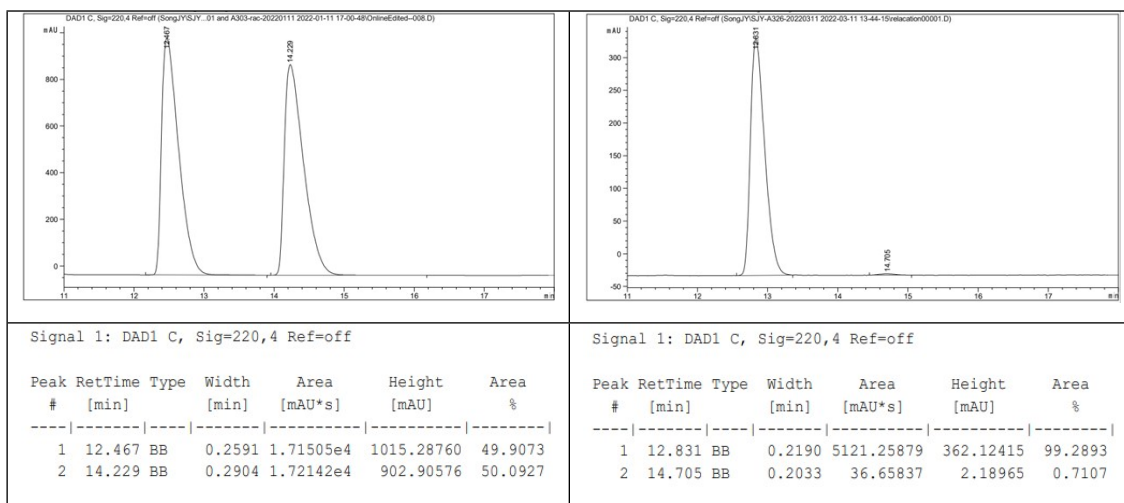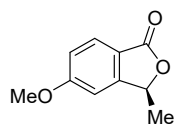

**(S)-5-methoxy-3-methylisobenzofuran-1(3H)-one (2b)** <sup>1</sup>: 71% yield, 99% ee. <sup>1</sup>H NMR (600 MHz, CDCl<sub>3</sub>)  $\delta$  7.78 (d,  $J = 8.5$  Hz, 1H), 7.02 (d,  $J = 8.4$  Hz, 1H), 6.84 (s, 1H), 5.47 (q,  $J = 7.4, 6.1$  Hz, 1H), 3.90 (s, 3H), 1.61 (d,  $J = 6.7$  Hz, 3H). <sup>13</sup>C NMR (151 MHz, CDCl<sub>3</sub>)  $\delta$  170.32, 164.86, 154.11, 127.37, 118.23, 116.40, 105.78, 77.14, 55.98, 20.56. **Optical Rotation:**  $[\alpha]_D^{22} = -52.0$  ( $c = 0.40$ , MeOH). The enantiomeric excess was determined by HPLC on Chiral OJ-3 column, 254 nm, 25 °C, n-hexane: i-PrOH = 90:10; flow 1.0 mL/min;  $t_R$  (major) = 22.02 min.

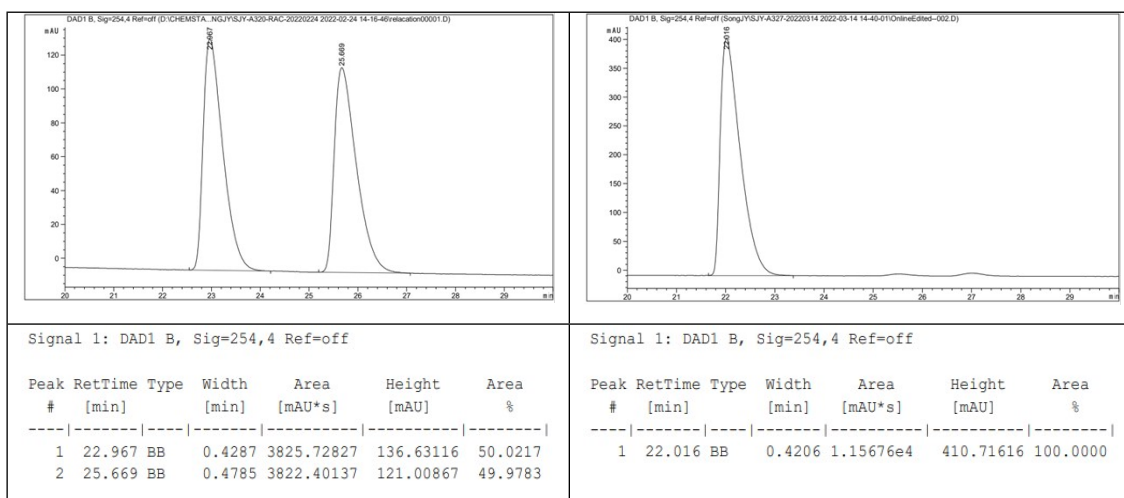

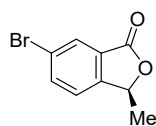

**(S)-6-bromo-3-methylisobenzofuran-1(3H)-one (2c)**<sup>1</sup>: 95% yield, 98% ee. <sup>1</sup>H NMR (400 MHz, CDCl<sub>3</sub>) δ 8.02 (d, *J* = 1.8 Hz, 1H), 7.79 (dd, *J* = 8.1, 1.8 Hz, 1H), 7.32 (d, *J* = 8.1 Hz, 1H), 5.53 (q, *J* = 6.7 Hz, 1H), 1.63 (d, *J* = 6.7 Hz, 3H). <sup>13</sup>C NMR (101 MHz, CDCl<sub>3</sub>) δ 168.83, 149.79, 137.12, 128.73, 127.96, 123.18, 123.07, 77.69, 20.27.

**Optical Rotation:** [ $\alpha$ ]<sub>D</sub><sup>22</sup> = -74.0 (*c* = 0.40, MeOH). The enantiomeric excess was determined by HPLC on Chiral OJ-3 column, 220 nm, 25 °C, n-hexane: i-PrOH = 90:10; flow 1.0 mL/min; *t*<sub>R</sub> (major) = 15.17 min; (minor) = 18.80 min.

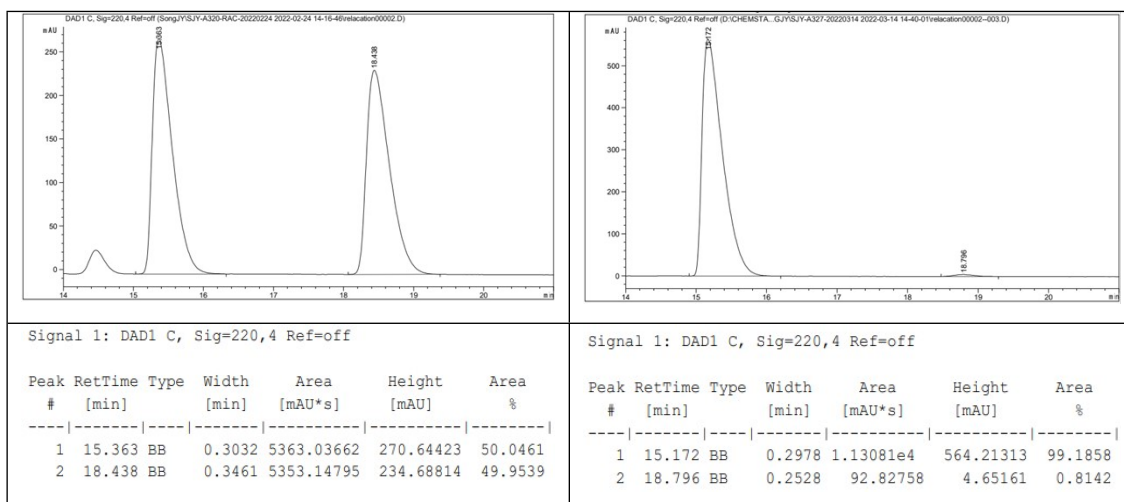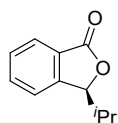

**(S)-3-isopropylisobenzofuran-1(3H)-one (2d)**<sup>1</sup>: 91% yield, 99% ee. <sup>1</sup>H NMR (600 MHz, CDCl<sub>3</sub>) δ 7.90 (d, *J* = 7.6 Hz, 1H), 7.66 (t, *J* = 8.1 Hz, 1H), 7.52 (t, *J* = 7.1 Hz, 1H), 7.44 (d, *J* = 7.7 Hz, 1H), 5.37 (d, *J* = 3.7 Hz, 1H), 2.28 (pd, *J* = 6.9, 3.7 Hz, 1H), 1.13 (d, *J* = 6.9 Hz, 3H), 0.81 (d, *J* = 6.9 Hz, 3H). <sup>13</sup>C NMR (151 MHz, CDCl<sub>3</sub>) δ 170.97, 149.02, 133.96, 129.19, 126.92, 125.84, 122.23, 85.79, 32.52, 18.83, 15.81.

**Optical Rotation:** [ $\alpha$ ]<sub>D</sub><sup>22</sup> = -2.9 (*c* = 0.60, MeOH). The enantiomeric excess was



determined by HPLC on Chiral OJ-3 column, 220 nm, 25 °C, n-hexane: i-PrOH = 90:10; flow 1.0 mL/min;  $t_R$  (major) = 7.87 min.

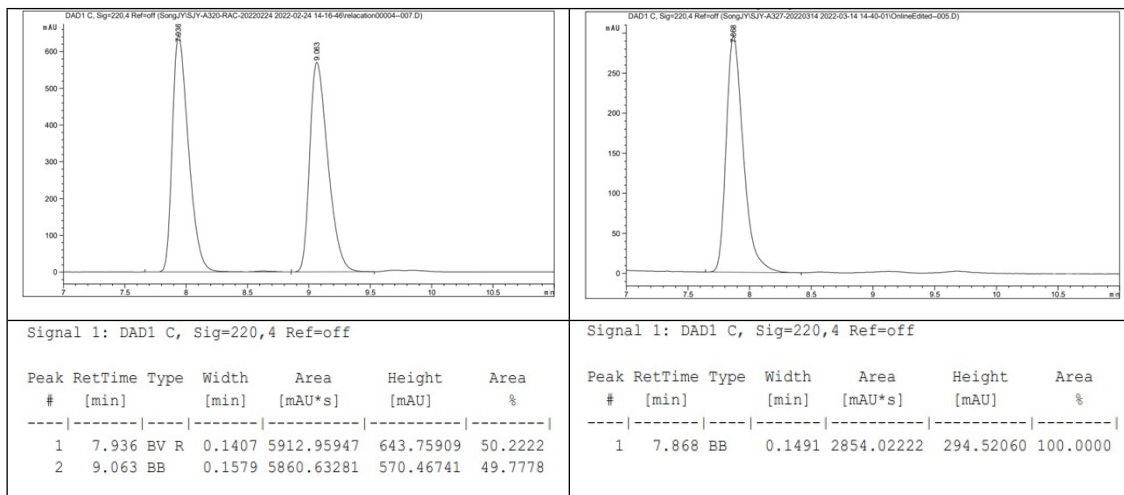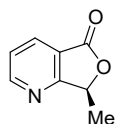

**(S)-7-methylfuro[3,4-b]pyridin-5(7H)-one (2e)** <sup>1</sup>: 99% yield, 97% ee. <sup>1</sup>H NMR (600 MHz, CDCl<sub>3</sub>) δ 8.89 (d,  $J$  = 4.6 Hz, 1H), 7.86 (d,  $J$  = 7.8 Hz, 1H), 7.57 (dd,  $J$  = 8.1, 4.5 Hz, 1H), 5.62 (q,  $J$  = 6.7 Hz, 1H), 1.68 (d,  $J$  = 6.7 Hz, 3H). <sup>13</sup>C NMR (151 MHz, CDCl<sub>3</sub>) δ 166.92, 151.55, 143.82, 143.50, 129.34, 126.20, 74.83, 19.18. **Optical Rotation:**  $[\alpha]_D^{22} = -22.1$  ( $c = 1.00$ , MeOH). The enantiomeric excess was determined by HPLC on Chiral OJ-3 column, 220 nm, 25 °C, n-hexane: i-PrOH = 75:25; flow 1.0 mL/min;  $t_R$  (major) = 15.91 min; (minor) = 19.75 min.

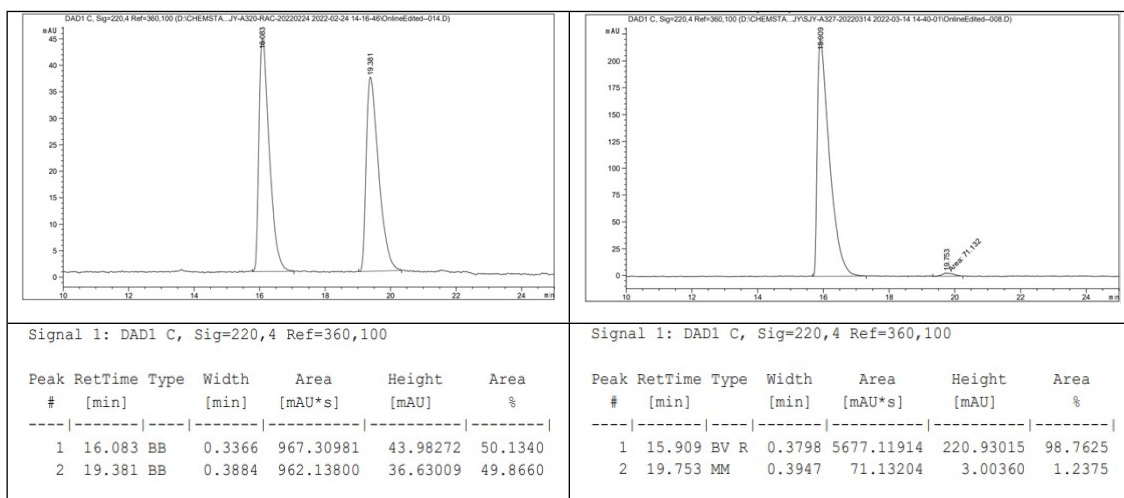

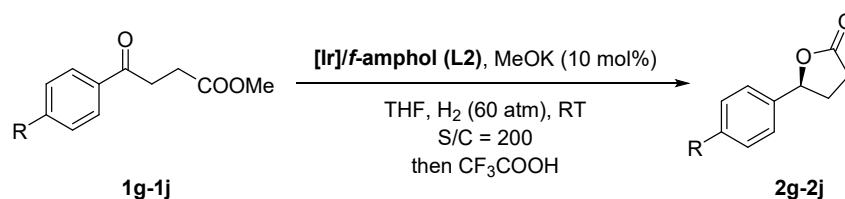

To a 4.0 mL vial was added the catalyst precursor [Ir(COD)Cl]<sub>2</sub> (6.72 mg, 1.0×10<sup>-2</sup> mmol), ligand (*R*<sub>C</sub>,*S*<sub>C</sub>,*R*<sub>C</sub>,*S*<sub>FC</sub>)-*f*-amphol (16.9 mg, 2.2×10<sup>-2</sup> mmol) and anhydrous IPA (2.0 mL) in the argon-filled glovebox. The mixture was stirred for 2.0 h at 25 °C giving orange red solution. And then 0.1 mmol of  $\gamma$ -ketoesters, MeOK (0.70 mg, 0.01 mmol) were added into a 5 mL hydrogenation vessel. 1.0 mL anhydrous THF was added as solvent and a solution of Ir/(*R*<sub>C</sub>,*S*<sub>C</sub>,*R*<sub>C</sub>,*S*<sub>FC</sub>)-*f*-amphol in anhydrous IPA (50  $\mu$ L) was added via an injection port. Then the vessel was placed in an autoclave, closed it and moved it out from glovebox. The autoclave quickly purged with hydrogen gas for three times, then pressurized to 60 atm H<sub>2</sub>. The reaction solution was stirred at room temperature (25 °C - 30 °C) until for 24 h, then released pressure carefully. THF was removed under reduced pressure. CF<sub>3</sub>COOH was added and the resulting reaction mixture was stirred in room temperature for 2 hours. Then, the solution of reaction mixture was purified by a flash chromatography on a silica gel with ethyl acetate and the solvent was removed under reduced pressure. The ee value were determined by chiral HPLC analysis of the hydrogenation product chiral lactones directly. The absolute configurations of chiral lactones were assigned by analogy.

**Table 1** Screening of reaction conditions for reducing methyl 4-oxo-4-phenylbutanoate (**1g**)<sup>a</sup>

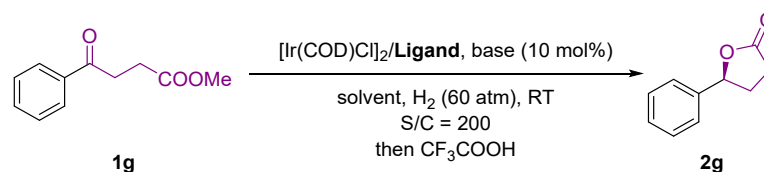

| Entry          | Ligand    | Solvent | Base                            | Conv. (%) <sup>b</sup> | ee (%) <sup>c</sup> |
|----------------|-----------|---------|---------------------------------|------------------------|---------------------|
| 1 <sup>d</sup> | <b>L1</b> | DCM     | Cs <sub>2</sub> CO <sub>3</sub> | 6%                     | 98%                 |
| 2 <sup>d</sup> | <b>L2</b> | DCM     | Cs <sub>2</sub> CO <sub>3</sub> | 33%                    | 98%                 |
| 3 <sup>d</sup> | <b>L3</b> | DCM     | Cs <sub>2</sub> CO <sub>3</sub> | NR                     | --                  |
| 4              | <b>L2</b> | EtOH    | Cs <sub>2</sub> CO <sub>3</sub> | 98%                    | 99%                 |

|    |    |               |                                 |     |     |
|----|----|---------------|---------------------------------|-----|-----|
| 5  | L2 | <i>i</i> PrOH | Cs <sub>2</sub> CO <sub>3</sub> | 57% | 99% |
| 6  | L2 | toluene       | Cs <sub>2</sub> CO <sub>3</sub> | 72% | 99% |
| 7  | L2 | THF           | Cs <sub>2</sub> CO <sub>3</sub> | 99% | 99% |
| 8  | L2 | THF           | MeOK                            | 99% | 99% |
| 9  | L2 | THF           | KOH                             | 99% | 99% |
| 10 | L2 | THF           | <i>t</i> BuOK                   | 99% | 99% |

<sup>a</sup>Reaction conditions: **1g** (0.10 mmol), [Ir(COD)Cl]<sub>2</sub> (0.0025 mmol), ligand (0.005 mmol), base (0.01 mmol), solvent (1 mL), H<sub>2</sub> (60 atm), RT, 24 h; <sup>b</sup>Determined by <sup>1</sup>H NMR analysis of the crude reaction mixture; <sup>c</sup>Determined by HPLC analysis using a chiral stationary phase; <sup>d</sup>S/C = 500.

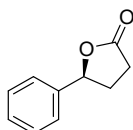

**(S)-5-phenyldihydrofuran-2(3H)-one (2g)** <sup>1</sup>: 99% yield, 99% ee. <sup>1</sup>H NMR (400 MHz, CDCl<sub>3</sub>) δ 7.53 – 7.26 (m, 5H), 5.52 (t, *J* = 7.0 Hz, 1H), 2.66 (d, *J* = 4.7 Hz, 3H), 2.20 (ddd, *J* = 12.5, 8.5, 4.2 Hz, 1H). <sup>13</sup>C NMR (101 MHz, CDCl<sub>3</sub>) δ 177.15, 139.34, 128.80, 128.49, 125.30, 81.36, 30.97, 29.00. **Optical Rotation:** [α]<sub>D</sub><sup>24</sup> = -20.2 (*c* = 0.60, MeOH). The enantiomeric excess was determined by HPLC on Chiral AS-H column, 220 nm, 25 °C, *n*-hexane: *i*-PrOH = 80:20; flow 1.0 mL/min; *t*<sub>R</sub> (major) = 14.81 min.

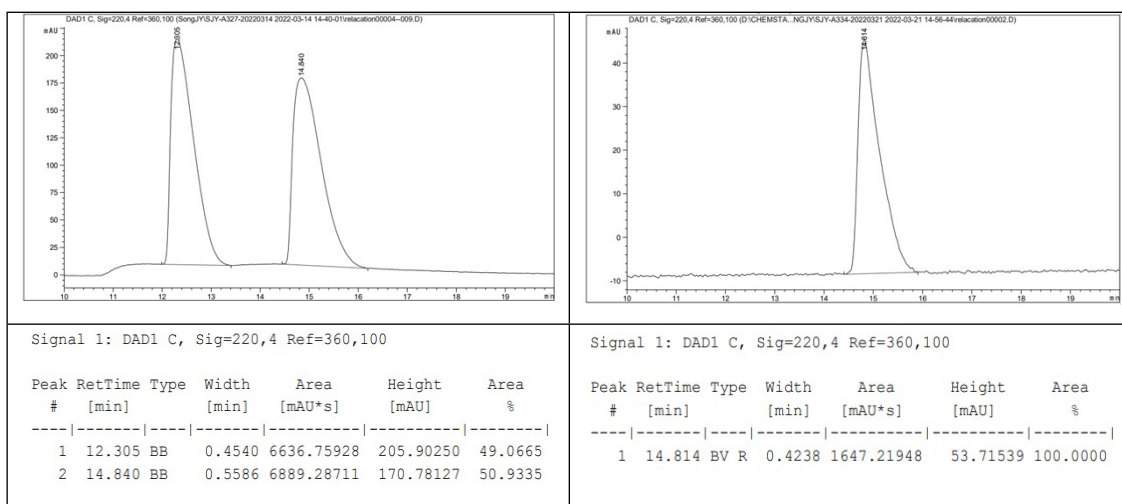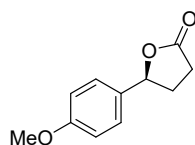

**(S)-5-(4-methoxyphenyl)dihydrofuran-2(3H)-one (2h)**<sup>1</sup>: 99% yield, 94% ee. <sup>1</sup>H NMR (400 MHz, CDCl<sub>3</sub>) δ 7.30 – 7.22 (m, 2H), 6.91 (d, *J* = 8.7 Hz, 2H), 5.46 (dd, *J* = 8.4, 6.0 Hz, 1H), 3.81 (s, 3H), 2.69 – 2.55 (m, 3H), 2.26 – 2.13 (m, 1H). <sup>13</sup>C NMR (101 MHz, CDCl<sub>3</sub>) δ 177.06, 159.79, 131.15, 126.97, 114.15, 81.41, 55.36, 30.90, 29.24. **Optical Rotation:** [α]<sub>D</sub><sup>24</sup> = -0.6 (*c* = 1.00, MeOH). The enantiomeric excess was determined by HPLC on Chiral AS-H column, 220 nm, 25 °C, *n*-hexane: *i*-PrOH = 75:25; flow 1.0 mL/min; *t*<sub>R</sub> (major) = 22.19 min; (minor) = 18.35 min.

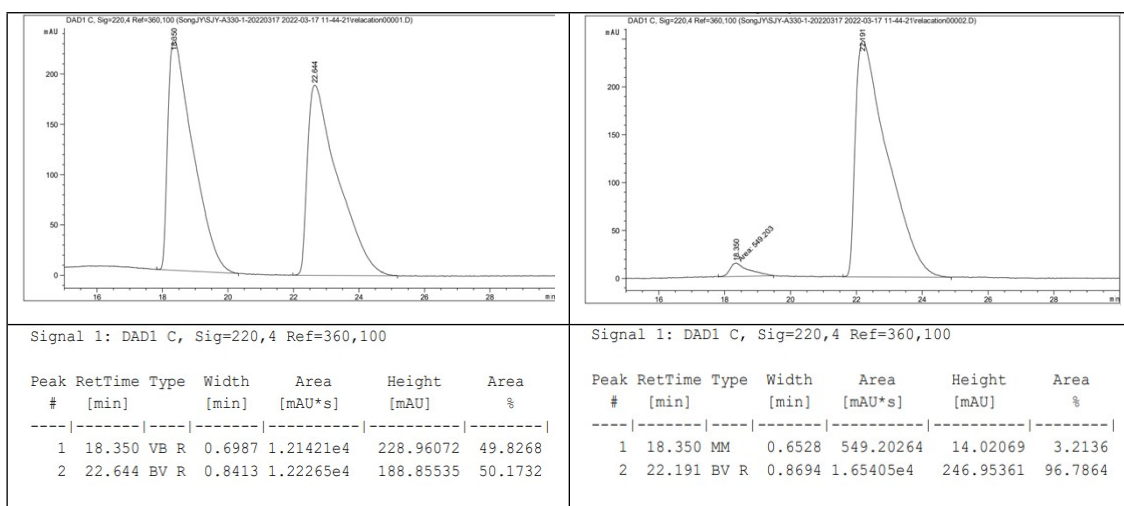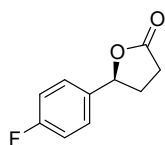

**(S)-5-(4-fluorophenyl)dihydrofuran-2(3H)-one (2i)**<sup>1</sup>: 99% yield, 99% ee. <sup>1</sup>H NMR (400 MHz, CDCl<sub>3</sub>) δ 7.32 (dd, *J* = 8.7, 5.1 Hz, 2H), 7.08 (t, *J* = 8.6 Hz, 2H), 5.49 (dd, *J* = 8.4, 5.8 Hz, 1H), 2.73 – 2.59 (m, 3H), 2.25 – 2.10 (m, 1H). <sup>13</sup>C NMR (101 MHz, CDCl<sub>3</sub>) δ 176.64, 163.92, 161.47, 135.11, 135.08, 127.25, 127.17, 115.87, 115.66, 80.67, 31.05, 29.02. **Optical Rotation:** [α]<sub>D</sub><sup>24</sup> = -5.4 (*c* = 0.30, MeOH). The enantiomeric excess was determined by HPLC on Chiral AS-H column, 220 nm, 25 °C, *n*-hexane: *i*-PrOH = 80:20; flow 1.0 mL/min; *t*<sub>R</sub> (major) = 16.11 min.

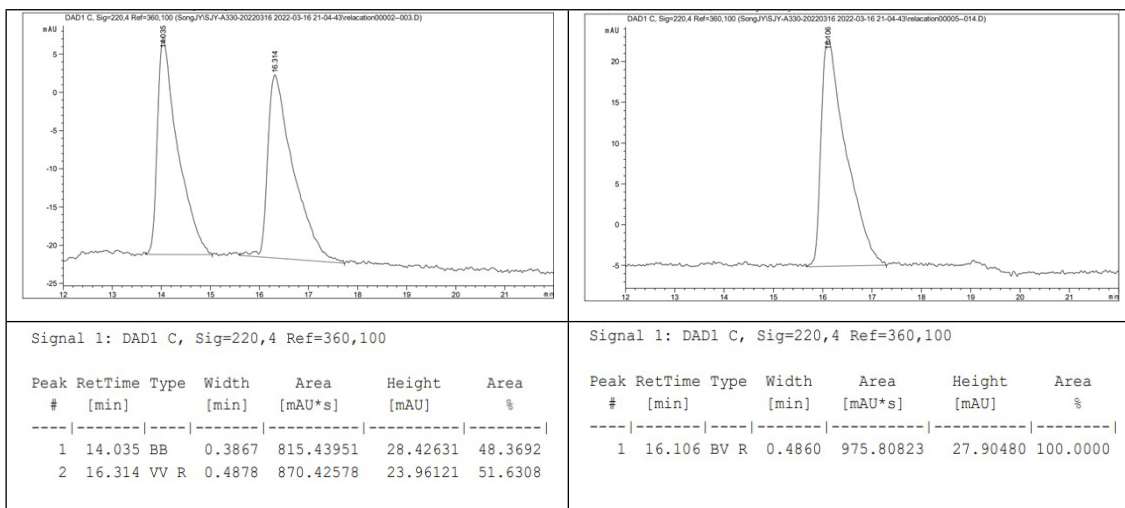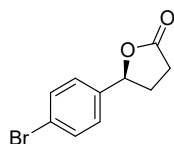

**(S)-5-(4-bromophenyl)dihydrofuran-2(3H)-one (2j)** <sup>1</sup>: 99% yield, 99% ee. <sup>1</sup>H NMR (400 MHz, CDCl<sub>3</sub>) δ 7.53 (d, J = 8.5 Hz, 2H), 7.21 (d, J = 8.4 Hz, 2H), 5.53 – 5.40 (m, 1H), 2.70 – 2.61 (m, 3H), 2.19 – 2.10 (m, 1H). <sup>13</sup>C NMR (101 MHz, CDCl<sub>3</sub>) 13C NMR (101 MHz, CDCl<sub>3</sub>) δ 176.80, 138.37, 131.96, 126.98, 122.45, 80.57, 30.91, 28.89. **Optical Rotation:** [α]<sub>D</sub><sup>24</sup> = -8.3 (c = 1.00, MeOH). The enantiomeric excess was determined by HPLC on Chiral AS-H column, 220 nm, 25 °C, *n*-hexane: *i*-PrOH = 80:20; flow 1.0 mL/min; t<sub>R</sub> (major) = 16.39 min; (minor) = 14.02 min.

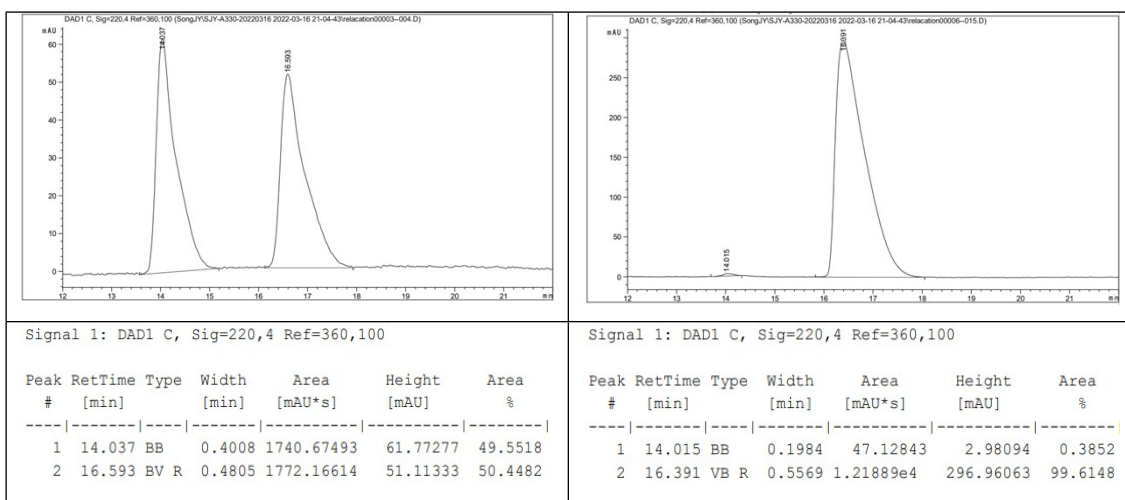

#### 4. General procedure for synthesis of biaryl bridged ketoesters

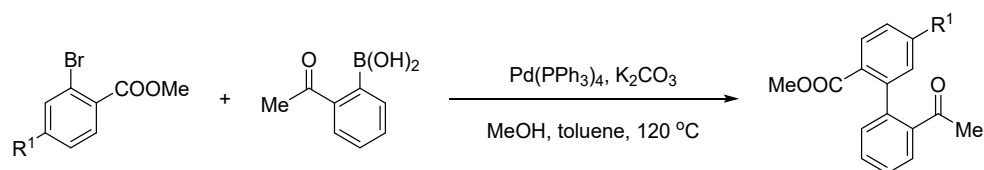

Compound **3b** and **3i** are prepared with the following steps. Others were prepared as described in the literature. The relevant data see the literature.<sup>3</sup>

To a solution of methyl 2-bromobenzoate (1.0 equiv) and arylboronic acid (1.0 equiv) in toluene (6 mL) and MeOH (3 mL), aqueous K<sub>2</sub>CO<sub>3</sub> (c = 0.276 g/mL, 2 mL) was added. The mixture was degassed by bubbling with Ar for 20 min. Pd(PPh<sub>3</sub>)<sub>4</sub> (0.05 equiv) was then added and the resulted mixture was allowed to stir at 120 °C for 8 h. The reaction mixture was then cool to room temperature and filtered through a thin pad of celite (eluted with EA). The filtrate was washed with saturated aqueous NaHCO<sub>3</sub> and the organic layers were combined and dried over anhydrous Na<sub>2</sub>SO<sub>4</sub>. The solvent was removed under reduced pressure and the crude product was purified by column chromatography (eluent: PE/EA = 10/1 to 4/1).

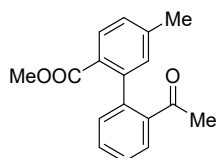

**Methyl 2'-acetyl-5-methyl-[1,1'-biphenyl]-2-carboxylate (3b)**<sup>3</sup>: <sup>1</sup>H NMR (600 MHz, CDCl<sub>3</sub>) δ 7.90 (d, *J* = 8.0 Hz, 1H), 7.71 (d, *J* = 8.5 Hz, 1H), 7.48 – 7.39 (m, 2H), 7.23 (d, *J* = 8.0 Hz, 1H), 7.15 (d, *J* = 7.5 Hz, 1H), 7.01 (s, 1H), 3.63 (s, 3H), 2.39 (s, 3H), 2.18 (s, 3H). <sup>13</sup>C NMR (151 MHz, CDCl<sub>3</sub>) δ 201.86, 167.37, 142.97, 142.34, 141.15, 138.70, 131.64, 130.73, 130.47, 130.12, 128.34, 128.15, 127.27, 126.70, 51.81, 29.38, 21.48.

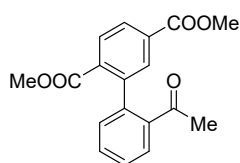

**Dimethyl 2'-acetyl-[1,1'-biphenyl]-2,5-dicarboxylate (3i)**<sup>3</sup>: <sup>1</sup>H NMR (600 MHz, CDCl<sub>3</sub>) δ 8.07 (dd, *J* = 8.1, 1.7 Hz, 1H), 8.02 (d, *J* = 8.2 Hz, 1H), 7.87 (d, *J* = 1.3 Hz, 1H), 7.79 (dd, *J* = 7.7, 1.4 Hz, 1H), 7.48 (dtd, *J* = 33.1, 7.5, 1.4 Hz, 2H), 7.17 (dd, *J* = 7.7, 1.2 Hz, 1H), 3.90 (s, 3H), 3.64 (s, 3H), 2.30 (s, 3H). <sup>13</sup>C NMR (151 MHz, CDCl<sub>3</sub>) δ 200.50, 166.72, 166.06, 143.29, 140.29, 137.73, 133.33, 132.70, 131.52, 131.22, 130.34, 130.09, 128.68, 128.34, 127.73, 52.42, 52.17, 28.98.

**3o**, **3p** and **3q** are prepared with the following steps.

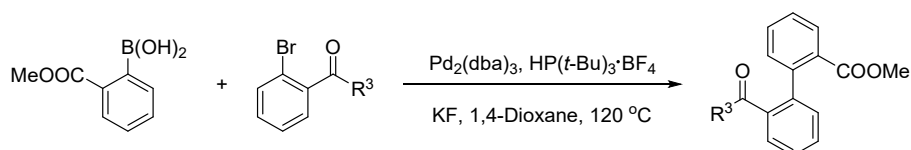

An oven-dried 25 mL Schlenk tube was charged with arylboronic acid (1.1 equiv), 2'-bromoacetophenone (1.0 equiv), Pd<sub>2</sub>dba<sub>3</sub> (0.01 equiv), HP(*t*-Bu)<sub>3</sub>·BF<sub>4</sub> (0.024 equiv) and KF (3.3 equiv). The Schlenk tube was capped with a rubber stopper and then evacuated and backfilled with argon for two times. 1,4-Dioxane (5.0 mL) was added via syringe and the reaction mixture was heated to 120 °C for 24 h. The resulted mixture was then cool to room temperature and filtered through a thin pad of celite (eluted with EA. The filtrate was washed with saturated aqueous NaHCO<sub>3</sub> and the organic layer was separated. The aqueous layer was extracted with EA (2 × 15 mL) and then the organic layers were combined and dried over anhydrous Na<sub>2</sub>SO<sub>4</sub>. The solvent was removed under reduced pressure and the crude product was purified by column chromatography (eluent: PE/EA = 10/1 to 4/1).

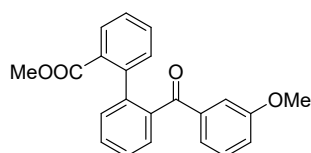

**Methyl 2'-(3-methoxybenzoyl)-[1,1'-biphenyl]-2-carboxylate (3o)**<sup>3</sup>: <sup>1</sup>H NMR (600 MHz, CDCl<sub>3</sub>) δ 7.74 (dd, *J* = 7.8, 1.4 Hz, 1H), 7.69 (dd, *J* = 7.9, 1.4 Hz, 2H), 7.40 (t, *J* = 7.4 Hz, 1H), 7.35 – 7.32 (m, 1H), 7.28 – 7.25 (m, 2H), 7.24 (d, *J* = 5.5 Hz, 1H), 7.23 – 7.21 (m, 1H), 7.19 (dd, *J* = 7.9, 1.4 Hz, 1H), 7.08 (dd, *J* = 8.5, 2.7 Hz, 1H),

7.04 (d,  $J = 2.6$  Hz, 1H), 3.86 (s, 3H), 3.65 (s, 3H).  $^{13}\text{C}$  NMR (151 MHz,  $\text{CDCl}_3$ )  $\delta$  167.65, 158.36, 139.40, 137.44, 133.19, 132.68, 131.97, 131.44, 131.20, 130.10, 130.07, 127.89, 127.14, 115.86, 113.98, 55.48, 51.91.

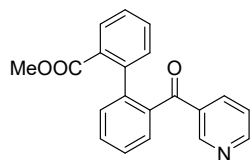

**Methyl 2'-nicotinoyl-[1,1'-biphenyl]-2-carboxylate (3p):**  $^1\text{H}$  NMR (400 MHz,  $\text{CDCl}_3$ )  $\delta$  8.83 (d,  $J = 2.1$  Hz, 1H), 8.60 (dd,  $J = 4.9, 1.8$  Hz, 1H), 7.97 (dt,  $J = 7.9, 2.0$  Hz, 1H), 7.80 (d,  $J = 7.1$  Hz, 1H), 7.58 (dd,  $J = 14.4, 6.9$  Hz, 2H), 7.52 – 7.47 (m, 1H), 7.40 (t,  $J = 7.6$  Hz, 1H), 7.34 (d,  $J = 7.8$  Hz, 1H), 7.30 – 7.26 (m, 1H), 7.24 – 7.18 (m, 2H), 3.65 (s, 3H).  $^{13}\text{C}$  NMR (101 MHz,  $\text{CDCl}_3$ )  $\delta$  196.67, 167.46, 152.93, 151.31, 141.30, 137.57, 137.02, 133.32, 131.73, 131.62, 130.91, 130.46, 130.39, 129.81, 129.14, 127.79, 127.33, 123.00, 52.17. **HRMS (ESI)**  $m/z$ :  $[\text{M}+\text{H}]^+$  Calcd for  $\text{C}_{20}\text{H}_{16}\text{NO}_3^+$  318.1125; Found 318.1125.

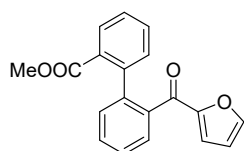

**Methyl 2'-(furan-2-carbonyl)-[1,1'-biphenyl]-2-carboxylate (3q):**  $^1\text{H}$  NMR (400 MHz,  $\text{CDCl}_3$ )  $\delta$  7.86 (dd,  $J = 7.8, 1.5$  Hz, 1H), 7.84 – 7.79 (m, 1H), 7.58 (dd,  $J = 7.5, 1.5$  Hz, 1H), 7.52 (td,  $J = 7.5, 1.5$  Hz, 1H), 7.44 (tdd,  $J = 7.5, 3.1, 1.4$  Hz, 2H), 7.33 (td,  $J = 7.6, 1.4$  Hz, 1H), 7.30 (t,  $J = 1.7$  Hz, 1H), 7.28 (dd,  $J = 7.5, 1.3$  Hz, 1H), 7.26 – 7.23 (m, 1H), 6.69 (dd,  $J = 2.0, 0.8$  Hz, 1H), 3.64 (s, 3H).  $^{13}\text{C}$  NMR (101 MHz,  $\text{CDCl}_3$ )  $\delta$  191.15, 167.80, 150.28, 143.83, 141.48, 140.35, 139.15, 131.55, 131.50, 130.42, 130.25, 130.14, 129.94, 128.19, 127.87, 127.57, 127.14, 109.38, 52.00. **HRMS (ESI)**  $m/z$ :  $[\text{M}+\text{H}]^+$  Calcd for  $\text{C}_{19}\text{H}_{15}\text{O}_4^+$  307.0965; Found 307.0964.



## 5. General procedure for asymmetric hydrogenation of bibenzoic-fused ketoesters

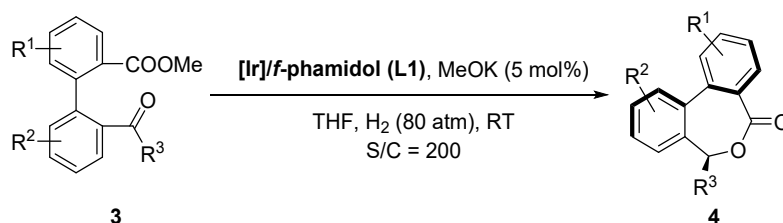

To a 4.0 mL vial was added the catalyst precursor  $[\text{Ir}(\text{COD})\text{Cl}]_2$  (6.72 mg,  $1.0 \times 10^{-2}$  mmol), ligand ( $R_C, S_C, R_C, S_{FC}$ )-*f*-amphol (16.9 mg,  $2.2 \times 10^{-2}$  mmol) and anhydrous IPA (2.0 mL) in the argon-filled glovebox. The mixture was stirred for 2.0 h at 25 °C giving orange solution. And then 0.1 mmol of biaryl ketoesters, MeOK (0.35 mg, 0.01 mmol) were added into a 5 mL hydrogenation vessel. 1.0 mL anhydrous DCM was added as solvent and a solution of Ir/( $R_C, S_C, R_C, S_{FC}$ )-*f*-amphol in anhydrous IPA (50  $\mu\text{L}$ ) was added via an injection port. Then the vessel was placed in an autoclave, closed it and moved it out from glovebox. The autoclave quickly purged with hydrogen gas for three times, then pressurized to 80 atm  $\text{H}_2$ . The reaction solution was stirred at room temperature (25 °C - 30 °C) until for 24 h, then released pressure carefully. DCM was removed under reduced pressure. The solution of reaction mixture was purified by a flash chromatography on a silica gel with ethyl acetate and the solvent was removed under reduced pressure. The ee value were determined by chiral HPLC analysis of the hydrogenation product chiral lactones directly. The absolute configurations of chiral lactones were assigned by analogy.

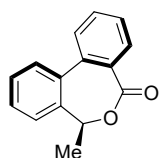

**(S)-7-methyldibenzo[*c,e*]oxepin-5(7H)-one (4a):** 99% yield, 99% ee.  $^1\text{H NMR}$  (600 MHz,  $\text{CDCl}_3$ )  $\delta$  7.98 (d,  $J = 7.7$  Hz, 1H), 7.66 (t,  $J = 7.6$  Hz, 1H), 7.60 (t,  $J = 9.0$  Hz, 2H), 7.53 (dt,  $J = 15.3, 7.7$  Hz, 3H), 7.47 (t,  $J = 7.5$  Hz, 1H), 5.29 (q,  $J = 6.7$  Hz, 1H), 1.85 (d,  $J = 6.6$  Hz, 3H).  $^{13}\text{C NMR}$  (151 MHz,  $\text{CDCl}_3$ )  $\delta$  170.01, 138.71, 137.58,

137.38, 132.54, 131.35, 130.93, 129.61, 128.99, 128.83, 128.59, 128.40, 123.97, 73.14, 29.72, 16.90. **HRMS (ESI)**  $m/z$ :  $[M+H]^+$  Calcd for  $C_{15}H_{13}O_2^+$  225.0910; Found 225.0907. **Optical Rotation**:  $[\alpha]_D^{23} = +91.5$  ( $c = 1.00$ ,  $CHCl_3$ ). The enantiomeric excess was determined by HPLC on Chiral OD-3 column, 254 nm, 25 °C,  $n$ -hexane:  $i$ -PrOH = 90:10; flow 1.0 mL/min;  $t_R$  (major) = 9.46 min,  $t_R$  (minor) = 11.07 min

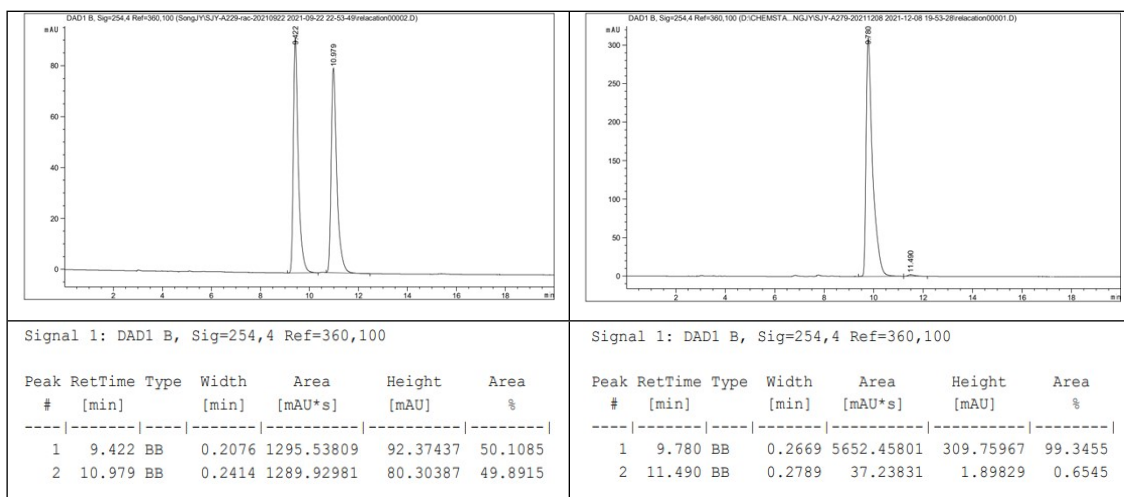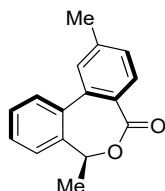

**(S)-2,7-dimethyldibenzo[*c,e*]oxepin-5(7H)-one (4b)**: 99% yield, 98% ee.  $^1H$  NMR (400 MHz,  $CDCl_3$ )  $\delta$  7.88 (d,  $J = 7.9$  Hz, 1H), 7.60 (d,  $J = 7.4$  Hz, 1H), 7.56 – 7.43 (m, 3H), 7.39 (s, 1H), 7.33 (d,  $J = 8.0$  Hz, 1H), 5.27 (q,  $J = 6.6$  Hz, 1H), 2.49 (s, 3H), 1.84 (d,  $J = 6.6$  Hz, 3H).  $^{13}C$  NMR (101 MHz,  $CDCl_3$ )  $\delta$  170.14, 143.13, 138.81, 137.64, 137.38, 131.51, 129.50, 129.41, 129.26, 128.93, 128.47, 128.18, 123.91, 73.05, 21.67, 16.92. **HRMS (ESI)**  $m/z$ :  $[M+H]^+$  Calcd for  $C_{16}H_{15}O_2^+$  239.1067; Found 239.1062. **Optical Rotation**:  $[\alpha]_D^{23} = +110.0$  ( $c = 1.00$ ,  $CHCl_3$ ). The enantiomeric excess was determined by HPLC on Chiral OD-3 column, 254 nm, 25 °C,  $n$ -hexane:  $i$ -PrOH = 90:10; flow 1.0 mL/min;  $t_R$  (major) = 8.88 min,  $t_R$  (minor) = 9.82 min.

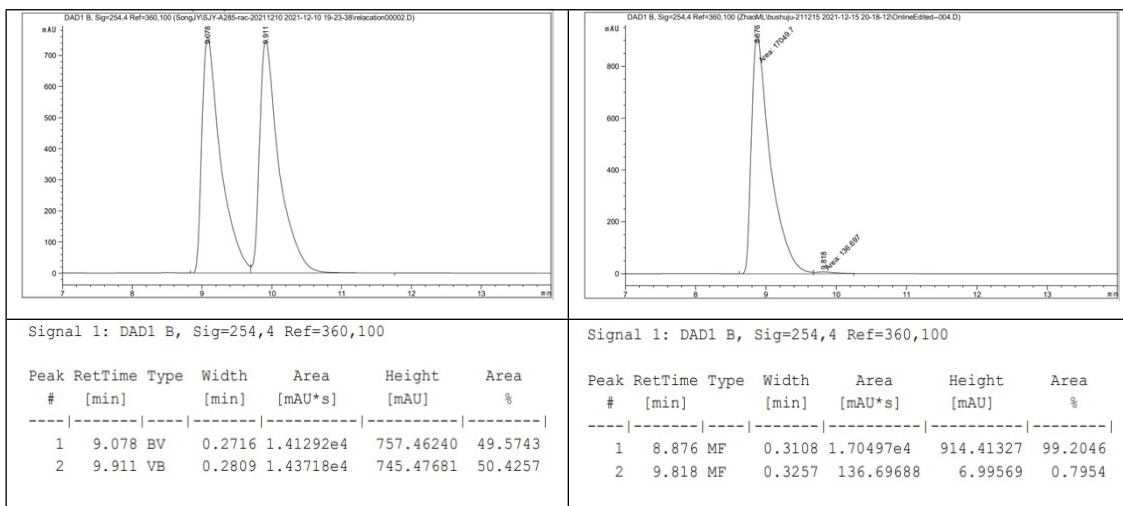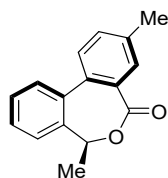

**(S)-3,7-dimethyldibenzo[*c,e*]oxepin-5(7*H*)-one (4c)**: 99% yield, 97% ee.  $^1\text{H}$  NMR (400 MHz,  $\text{CDCl}_3$ )  $\delta$  7.80 (s, 1H), 7.59 (dd,  $J = 7.5, 1.5$  Hz, 1H), 7.57 – 7.38 (m, 5H), 5.30 – 5.22 (m, 1H), 2.46 (s, 3H), 1.85 (d,  $J = 6.6$  Hz, 3H).  $^{13}\text{C}$  NMR (101 MHz,  $\text{CDCl}_3$ )  $\delta$  170.36, 138.84, 138.70, 137.54, 134.75, 133.59, 131.78, 130.78, 129.65, 128.91, 128.38, 124.05, 73.29, 21.13, 17.04. **HRMS (ESI)**  $m/z$ :  $[\text{M}+\text{H}]^+$  Calcd for  $\text{C}_{16}\text{H}_{15}\text{O}_2^+$  239.1067; Found 239.1062. **Optical Rotation**:  $[\alpha]_{\text{D}}^{23} = +144.3$  ( $c = 1.00$ ,  $\text{CHCl}_3$ ). The enantiomeric excess was determined by HPLC on Chiral OD-3 column, 254 nm, 25 °C, *n*-hexane: *i*-PrOH = 90:10; flow 1.0 mL/min;  $t_{\text{R}}$  (major) = 8.50 min,  $t_{\text{R}}$  (minor) = 9.83 min.

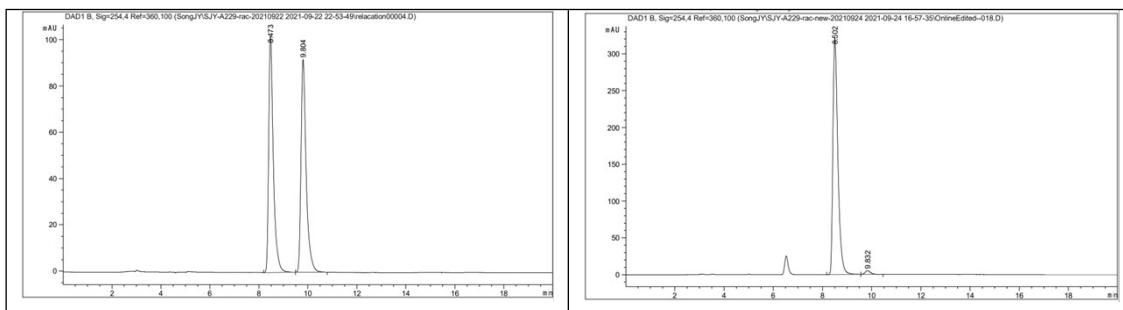

| Signal 1: DAD1 B, Sig=254,4 Ref=360,100 |               |      |             |              |              |         | Signal 1: DAD1 B, Sig=254,4 Ref=360,100 |               |      |             |              |              |         |
|-----------------------------------------|---------------|------|-------------|--------------|--------------|---------|-----------------------------------------|---------------|------|-------------|--------------|--------------|---------|
| Peak #                                  | RetTime [min] | Type | Width [min] | Area [mAU*s] | Height [mAU] | Area %  | Peak #                                  | RetTime [min] | Type | Width [min] | Area [mAU*s] | Height [mAU] | Area %  |
| 1                                       | 8.473         | BB   | 0.1959      | 1345.63965   | 102.03900    | 50.0411 | 1                                       | 8.502         | BB   | 0.2109      | 4488.01025   | 321.38776    | 98.3733 |
| 2                                       | 9.804         | BB   | 0.2186      | 1343.42822   | 91.86837     | 49.9589 | 2                                       | 9.832         | BB   | 0.2298      | 74.21227     | 4.92580      | 1.6267  |

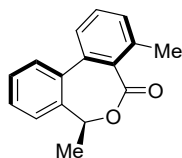

**(S)-4,7-dimethyldibenzo[*c,e*]oxepin-5(7H)-one (4d):** 99% yield, 98% ee. <sup>1</sup>H NMR (600 MHz, CDCl<sub>3</sub>) δ 7.61 (dd, *J* = 7.6, 1.4 Hz, 1H), 7.53 – 7.43 (m, 4H), 7.37 – 7.33 (m, 2H), 5.25 (q, *J* = 6.5 Hz, 1H), 2.58 (s, 3H), 1.83 (d, *J* = 6.5 Hz, 3H). <sup>13</sup>C NMR (151 MHz, CDCl<sub>3</sub>) δ 168.82, 139.23, 138.85, 138.03, 137.44, 131.02, 130.97, 130.71, 129.63, 129.09, 128.48, 126.59, 123.89, 72.77, 21.38, 16.71. **Optical Rotation:** [α]<sub>D</sub><sup>23</sup> = +254.2 (*c* = 1.00, CHCl<sub>3</sub>). The enantiomeric excess was determined by HPLC on Chiral OD-3 column, 254 nm, 25 °C, *n*-hexane: *i*-PrOH = 90:10; flow 1.0 mL/min; *t*<sub>R</sub> (major) = 7.73 min, *t*<sub>R</sub> (minor) = 10.44 min.

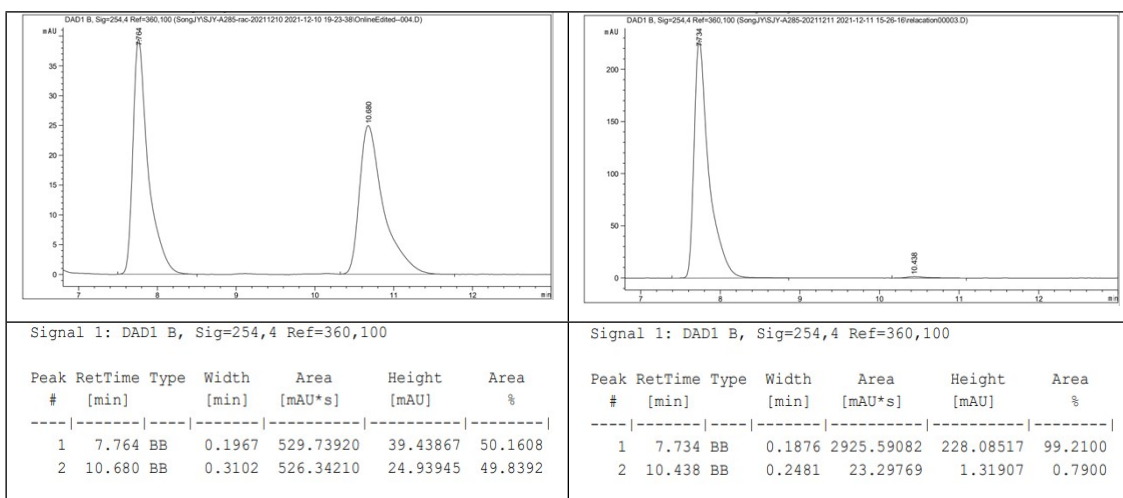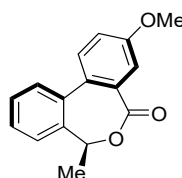

**(S)-3-methoxy-7-methyldibenzo[*c,e*]oxepin-5(7H)-one (4e):** 71% yield, 91% ee. <sup>1</sup>H NMR (600 MHz, CDCl<sub>3</sub>) δ 7.58 – 7.46 (m, 5H), 7.42 (t, *J* = 7.3 Hz, 1H), 7.21 (d, *J* =

8.6 Hz, 1H), 5.27 (q,  $J = 7.0, 6.5$  Hz, 1H), 3.90 (s, 3H), 1.85 (d,  $J = 6.6$  Hz, 3H).  $^{13}\text{C}$  NMR (151 MHz,  $\text{CDCl}_3$ )  $\delta$  169.90, 159.57, 138.58, 137.19, 131.95, 130.43, 130.17, 129.60, 128.69, 128.01, 123.99, 120.12, 114.69, 73.42, 55.76, 17.01. **HRMS (ESI)**  $m/z$ :  $[\text{M}+\text{H}]^+$  Calcd for  $\text{C}_{16}\text{H}_{15}\text{O}_3^+$  255.1016; Found 255.1012. **Optical Rotation**:  $[\alpha]_{\text{D}}^{23} = +27.4$  ( $c = 1.00$ ,  $\text{CHCl}_3$ ). The enantiomeric excess was determined by HPLC on Chiral OD-3 column, 254 nm, 25 °C,  $n$ -hexane:  $i$ -PrOH = 90:10; flow 1.0 mL/min;  $t_{\text{R}}$  (major) = 10.26 min,  $t_{\text{R}}$  (minor) = 14.46 min.

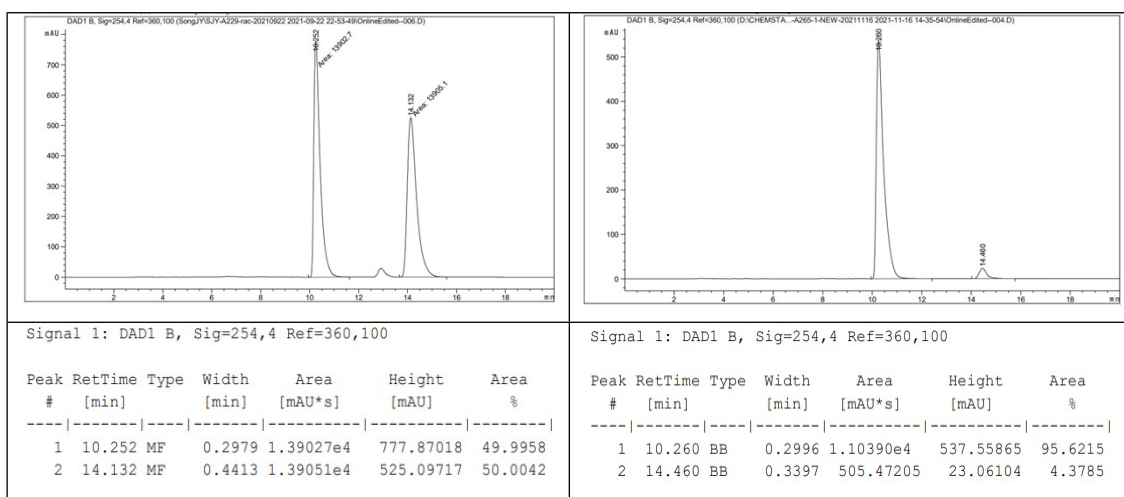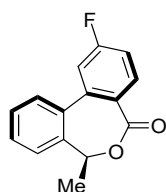

**(S)-2-fluoro-7-methyldibenzo[*c,e*]oxepin-5(7H)-one (4f)**: 68% yield, 87% ee.  $^1\text{H}$  NMR (400 MHz,  $\text{CDCl}_3$ )  $\delta$  8.02 (dd,  $J = 8.7, 5.8$  Hz, 1H), 7.61 – 7.48 (m, 4H), 7.29 (dd,  $J = 9.6, 2.6$  Hz, 1H), 7.21 (td,  $J = 8.2, 2.6$  Hz, 1H), 5.29 (q,  $J = 6.6$  Hz, 1H), 1.86 (d,  $J = 6.6$  Hz, 3H).  $^{13}\text{C}$  NMR (101 MHz,  $\text{CDCl}_3$ )  $\delta$  169.21, 166.28, 163.76, 140.39, 140.30, 137.77, 137.65, 134.50, 134.40, 129.90, 129.34, 129.08, 127.30, 124.29, 116.03, 115.81, 115.72, 115.49, 73.28, 17.03. **HRMS (ESI)**  $m/z$ :  $[\text{M}+\text{H}]^+$  Calcd for  $\text{C}_{15}\text{H}_{12}\text{FO}_2^+$  243.0816; Found 243.0813. **Optical Rotation**:  $[\alpha]_{\text{D}}^{23} = +73.4$  ( $c = 1.00$ ,  $\text{CHCl}_3$ ). The enantiomeric excess was determined by HPLC on Chiral AD-3 column, 254 nm, 25 °C,  $n$ -hexane:  $i$ -PrOH = 90:10; flow 1.0 mL/min;  $t_{\text{R}}$  (major) = 10.64 min,  $t_{\text{R}}$  (minor) = 12.22 min.

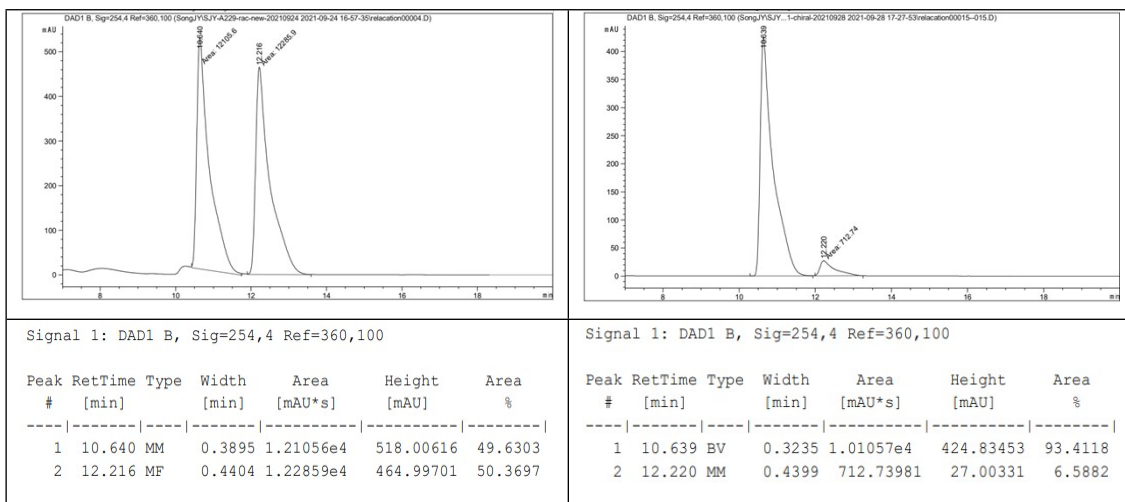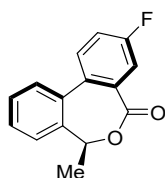

**(S)-3-fluoro-7-methyldibenzo[*c,e*]oxepin-5(7*H*)-one (4g):** 89% yield, 99% ee. <sup>1</sup>H NMR (600 MHz, CDCl<sub>3</sub>) δ 7.69 (dd, *J* = 8.8, 2.8 Hz, 1H), 7.65 – 7.44 (m, 5H), 7.38 (td, *J* = 8.2, 2.8 Hz, 1H), 5.29 (q, *J* = 6.4 Hz, 1H), 1.87 (d, *J* = 6.7 Hz, 3H). <sup>13</sup>C NMR (151 MHz, CDCl<sub>3</sub>) δ 168.74, 163.19, 161.53, 137.89, 137.37, 133.76, 132.79, 131.13, 131.08, 129.87, 129.02, 128.79, 124.24, 120.19, 120.05, 118.13, 117.98, 73.56, 17.02. HRMS (ESI) *m/z*: [M+H]<sup>+</sup> Calcd for C<sub>15</sub>H<sub>12</sub>FO<sub>2</sub><sup>+</sup> 243.0816; Found 243.0813. **Optical Rotation:** [α]<sub>D</sub><sup>23</sup> = +1.6 (*c* = 1.00, CHCl<sub>3</sub>). The enantiomeric excess was determined by HPLC on Chiral OD-3 column, 254 nm, 25 °C, *n*-hexane: *i*-PrOH = 90:10; flow 1.0 mL/min; *t*<sub>R</sub> (major) = 8.31 min.

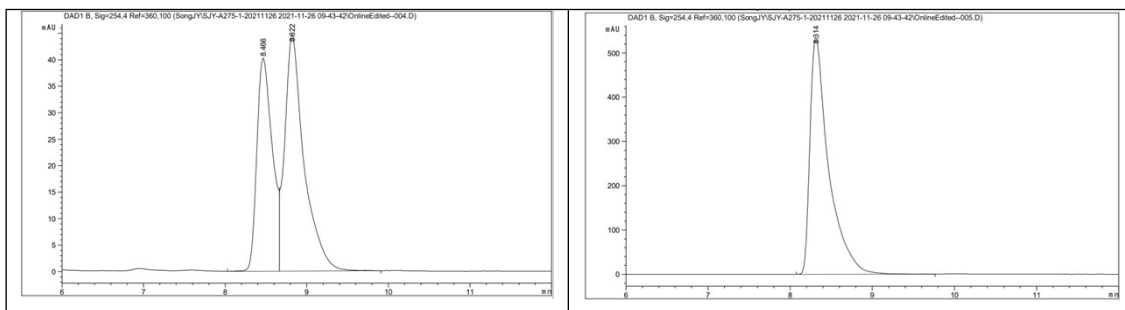

| Signal 1: DAD1 B, Sig=254,4 Ref=360,100 |               |      |             |              |              |         | Signal 1: DAD1 B, Sig=254,4 Ref=360,100 |               |      |             |              |              |          |
|-----------------------------------------|---------------|------|-------------|--------------|--------------|---------|-----------------------------------------|---------------|------|-------------|--------------|--------------|----------|
| Peak #                                  | RetTime [min] | Type | Width [min] | Area [mAU*s] | Height [mAU] | Area %  | Peak #                                  | RetTime [min] | Type | Width [min] | Area [mAU*s] | Height [mAU] | Area %   |
| 1                                       | 8.466         | BV   | 0.1993      | 528.49121    | 40.21690     | 41.8912 | 1                                       | 8.314         | BB   | 0.2283      | 8451.03125   | 535.11279    | 100.0000 |
| 2                                       | 8.822         | VB   | 0.2343      | 733.08832    | 44.47321     | 58.1088 |                                         |               |      |             |              |              |          |

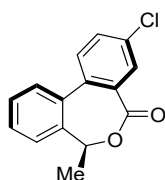

**(S)-3-chloro-7-methyldibenzo[*c,e*]oxepin-5(7H)-one (4h):** 77% yield, 97% ee (S/C = 100). <sup>1</sup>H NMR (400 MHz, CDCl<sub>3</sub>) δ 7.97 (d, J = 2.3 Hz, 1H), 7.65 – 7.47 (m, 6H), 5.28 (q, J = 6.6 Hz, 1H), 1.86 (d, J = 6.6 Hz, 3H). <sup>13</sup>C NMR (101 MHz, CDCl<sub>3</sub>) δ 168.75, 137.76, 137.45, 135.88, 134.74, 132.79, 132.36, 131.24, 130.40, 129.92, 129.06, 128.97, 124.30, 73.49, 17.00. **HRMS (ESI)** m/z: [M+H]<sup>+</sup> Calcd for C<sub>15</sub>H<sub>12</sub>ClO<sub>2</sub><sup>+</sup> 259.0520; Found 259.0517. **Optical Rotation:** [α]<sub>D</sub><sup>23</sup> = +11.8 (c = 1.00, CHCl<sub>3</sub>). The enantiomeric excess was determined by HPLC on Chiral OJ-3 column, 254 nm, 25 °C, *n*-hexane: *i*-PrOH = 90:10; flow 1.0 mL/min; t<sub>R</sub> (major) = 16.97 min, t<sub>R</sub> (minor) = 14.86 min.

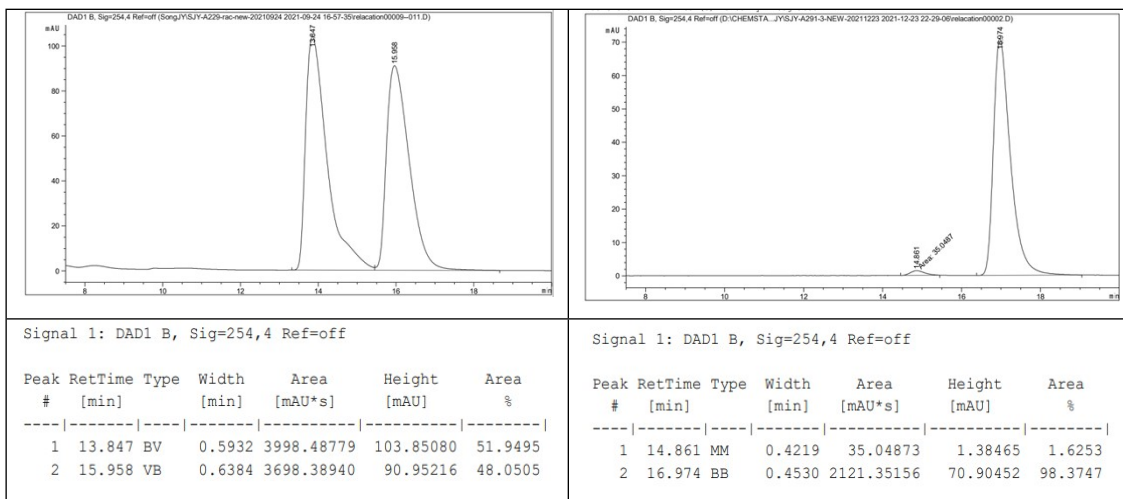

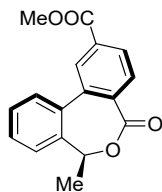

**Methyl (*S*)-7-methyl-5-oxo-5,7-dihydrodibenzo[*c,e*]oxepine-2-carboxylate (4i):** 87% yield, 90% ee.  $^1\text{H NMR}$  (400 MHz,  $\text{CDCl}_3$ )  $\delta$  8.27 (dd,  $J = 8.6, 1.7$  Hz, 1H), 8.15 (dd,  $J = 8.1, 1.6$  Hz, 1H), 8.05 (d,  $J = 8.1$  Hz, 1H), 7.69 (d,  $J = 7.6$  Hz, 1H), 7.60 – 7.48 (m, 3H), 5.27 (t,  $J = 6.6$  Hz, 1H), 3.99 (s, 3H), 1.87 (d,  $J = 6.6$  Hz, 3H).  $^{13}\text{C NMR}$  (101 MHz,  $\text{CDCl}_3$ )  $\delta$  168.10, 164.92, 136.84, 136.51, 136.37, 133.51, 132.66, 130.56, 129.05, 128.83, 128.11, 128.05, 127.89, 123.10, 72.30, 51.63, 15.83.  $^1\text{H NMR}$  (400 MHz,  $\text{CDCl}_3$ )  $\delta$  8.28 (d,  $J = 1.6$  Hz, 1H), 8.15 (dd,  $J = 8.1, 1.7$  Hz, 1H), 8.05 (d,  $J = 8.1$  Hz, 1H), 7.69 (dd,  $J = 7.9, 1.5$  Hz, 1H), 7.60 – 7.47 (m, 3H), 5.28 (q,  $J = 6.5$  Hz, 1H), 3.99 (s, 3H), 1.87 (d,  $J = 6.6$  Hz, 3H).  $^{13}\text{C NMR}$  (101 MHz,  $\text{CDCl}_3$ )  $\delta$  169.29, 166.08, 137.98, 137.66, 137.50, 134.64, 133.80, 131.72, 130.21, 129.99, 129.27, 129.21, 129.05, 124.26, 73.47, 52.80, 17.00. **HRMS (ESI)**  $m/z$ :  $[\text{M}+\text{H}]^+$  Calcd for  $\text{C}_{17}\text{H}_{15}\text{O}_4^+$  283.0965; Found 283.0962. **Optical Rotation:**  $[\alpha]_{\text{D}}^{23} = +34.5$  ( $c = 1.00$ ,  $\text{CHCl}_3$ ). The enantiomeric excess was determined by HPLC on Chiral OD-3 column, 254 nm, 25 °C, *n*-hexane: *i*-PrOH = 90:10; flow 1.0 mL/min;  $t_{\text{R}}$  (major) = 12.72 min,  $t_{\text{R}}$  (minor) = 11.43 min.

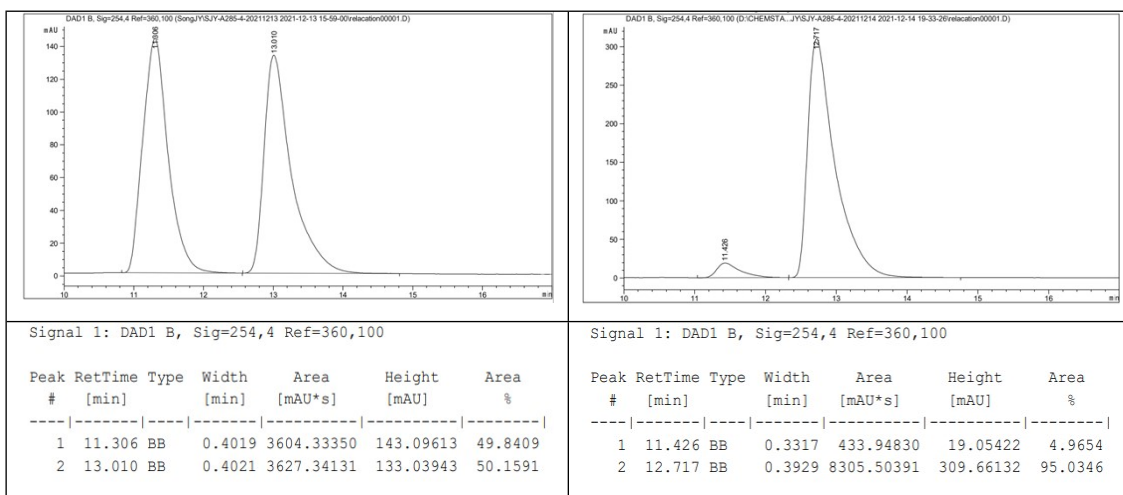



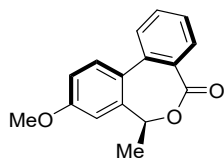

**(S)-9-methoxy-7-methyldibenzo[*c,e*]oxepin-5(7H)-one (4j):** 92% yield, 77% ee (S/C = 100).  $^1\text{H NMR}$  (400 MHz,  $\text{CDCl}_3$ )  $\delta$  7.97 (d,  $J = 7.8$  Hz, 1H), 7.64 (t,  $J = 7.6$  Hz, 1H), 7.54 (dd,  $J = 8.2, 3.6$  Hz, 2H), 7.47 (t,  $J = 7.6$  Hz, 1H), 7.13 – 6.98 (m, 2H), 5.27 (q,  $J = 6.6$  Hz, 1H), 3.90 (s, 3H), 1.83 (d,  $J = 6.6$  Hz, 3H).  $^{13}\text{C NMR}$  (101 MHz,  $\text{CDCl}_3$ )  $\delta$  160.06, 139.17, 137.45, 132.63, 131.57, 130.42, 128.63, 127.88, 114.49, 110.39, 73.14, 55.67, 17.00. **HRMS (ESI)**  $m/z$ :  $[\text{M}+\text{H}]^+$  Calcd for  $\text{C}_{16}\text{H}_{15}\text{O}_3^+$  255.1016; Found 255.1012. **Optical Rotation:**  $[\alpha]_{\text{D}}^{23} = +34.5$  ( $c = 1.00$ ,  $\text{CHCl}_3$ ). The enantiomeric excess was determined by HPLC on Chiral OD-3 column, 254 nm, 25  $^\circ\text{C}$ , *n*-hexane: *i*-PrOH = 90:10; flow 1.0 mL/min;  $t_{\text{R}}$  (major) = 11.07 min,  $t_{\text{R}}$  (minor) = 16.75 min.

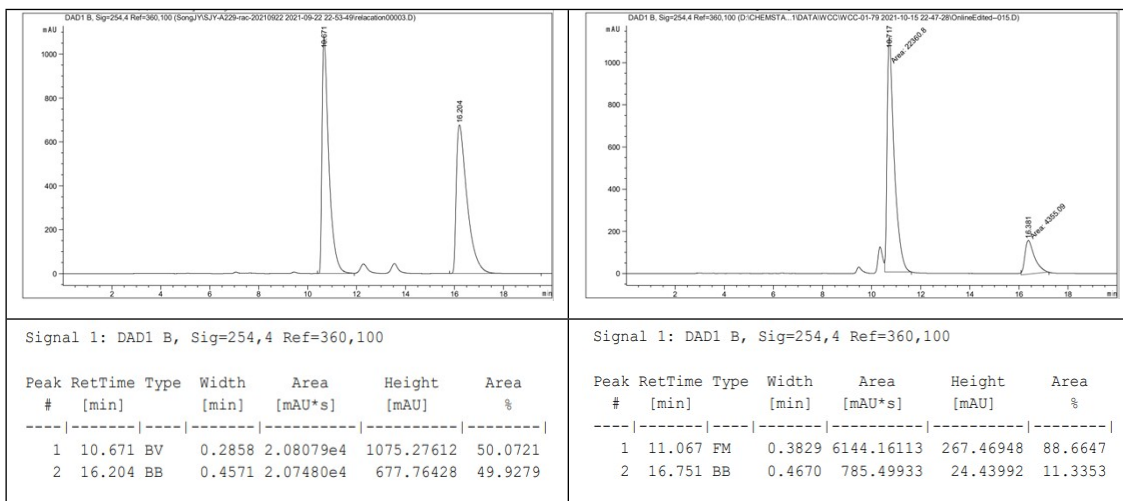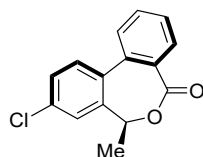

**(S)-9-chloro-7-methyldibenzo[*c,e*]oxepin-5(7H)-one (4k):** 96% yield, 90% ee (S/C = 100).  $^1\text{H NMR}$  (400 MHz,  $\text{CDCl}_3$ )  $\delta$  7.99 (d,  $J = 8.1$  Hz, 1H), 7.70 – 7.64 (m, 1H), 7.58 – 7.48 (m, 5H), 5.25 (q,  $J = 6.6$  Hz, 1H), 1.84 (d,  $J = 6.6$  Hz, 3H).  $^{13}\text{C NMR}$  (101 MHz,  $\text{CDCl}_3$ )  $\delta$  139.35, 137.21, 136.41, 134.95, 132.84, 131.71, 130.84, 130.44, 129.85, 128.89, 128.80, 124.66, 72.72, 16.97. **HRMS (ESI)**  $m/z$ :  $[\text{M}+\text{H}]^+$  Calcd for

$C_{15}H_{12}ClO_2^+$  259.0520; Found 259.0517. **Optical Rotation:**  $[\alpha]_D^{23} = +6.1$  ( $c = 1.00$ ,  $CHCl_3$ ). The enantiomeric excess was determined by HPLC on Chiral OJ-3 column, 254 nm, 25 °C, *n*-hexane: *i*-PrOH = 90:10; flow 1.0 mL/min;  $t_R$  (major) = 21.17 min,  $t_R$  (minor) = 19.40 min.

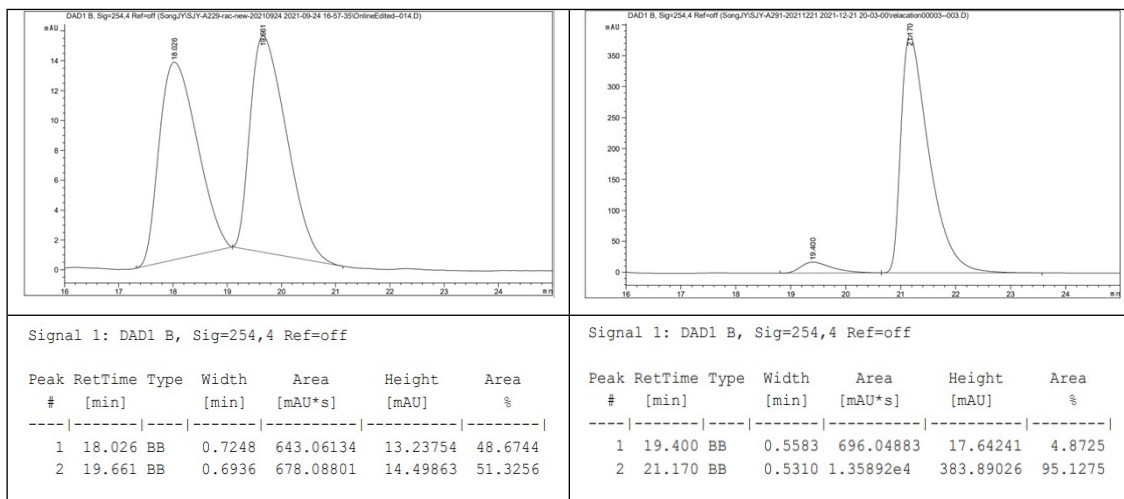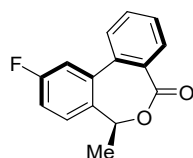

**(S)-10-fluoro-7-methyldibenzo[*c,e*]oxepin-5(7*H*)-one (4):** 91% yield, 98% ee (S/C = 100).  $^1H$  NMR (400 MHz,  $CDCl_3$ )  $\delta$  7.99 (d,  $J = 6.6$  Hz, 1H), 7.72 – 7.65 (m, 1H), 7.56 (d,  $J = 7.5$  Hz, 3H), 7.31 (dd,  $J = 9.4, 2.7$  Hz, 1H), 7.16 (td,  $J = 8.4, 2.7$  Hz, 1H), 5.24 (q,  $J = 6.6$  Hz, 1H), 1.84 (d,  $J = 6.6$  Hz, 3H).  $^{13}C$  NMR (101 MHz,  $CDCl_3$ )  $\delta$  169.78, 164.54, 162.07, 141.00, 140.91, 136.31, 136.29, 133.77, 132.83, 131.64, 131.05, 129.10, 128.82, 126.29, 126.20, 116.01, 115.79, 115.50, 115.28, 72.65, 17.22. **HRMS (ESI)**  $m/z$ :  $[M+H]^+$  Calcd for  $C_{15}H_{12}FO_2^+$  243.0816; Found 243.0812. **Optical Rotation:**  $[\alpha]_D^{23} = +122.1$  ( $c = 1.00$ ,  $CHCl_3$ ). The enantiomeric excess was determined by HPLC on Chiral OD-3 column, 254 nm, 25 °C, *n*-hexane: *i*-PrOH = 90:10; flow 1.0 mL/min;  $t_R$  (major) = 9.97 min,  $t_R$  (minor) = 9.30 min.

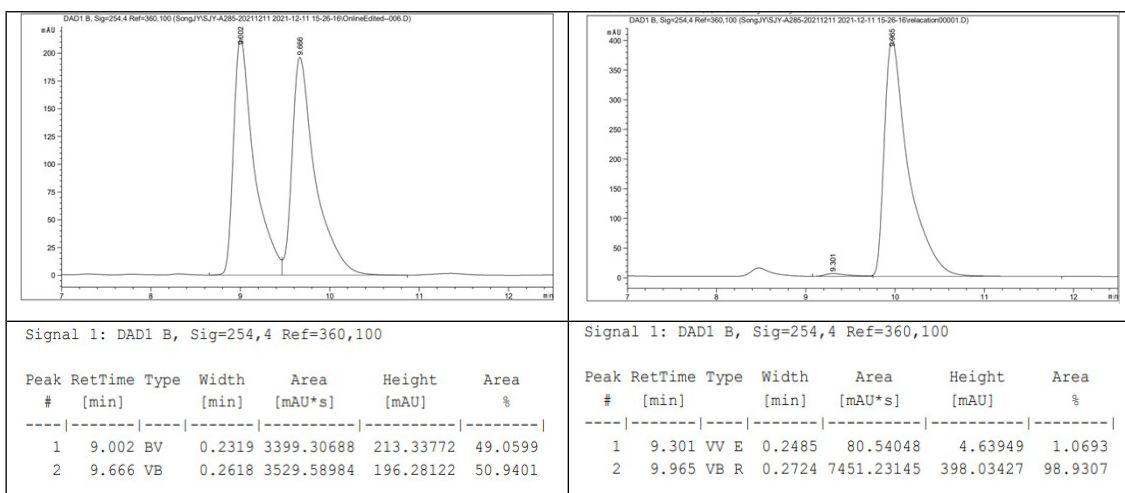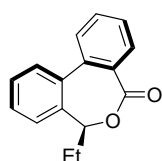

**(S)-7-ethyl-5,6,7,8-tetrahydro-1,2-dibenzocyclohexa[b][1,4]oxepin-5(7H)-one (4m):** 99% yield, 99% ee.  $^1\text{H NMR}$  (400 MHz,  $\text{CDCl}_3$ )  $\delta$  7.99 (d,  $J = 7.8$  Hz, 1H), 7.67 (t,  $J = 7.6$  Hz, 1H), 7.60 (d,  $J = 6.7$  Hz, 2H), 7.56 – 7.43 (m, 4H), 4.94 (dd,  $J = 8.8, 5.1$  Hz, 1H), 2.35 (tt,  $J = 14.6, 7.6$  Hz, 1H), 2.26 – 2.13 (m, 1H), 1.15 (t,  $J = 7.3$  Hz, 3H).  $^{13}\text{C NMR}$  (101 MHz,  $\text{CDCl}_3$ )  $\delta$  170.28, 139.05, 137.50, 136.97, 132.60, 131.37, 131.05, 129.55, 129.18, 128.82, 128.63, 128.48, 124.34, 78.56, 23.97, 10.82. **HRMS (ESI)**  $m/z$ :  $[\text{M}+\text{H}]^+$  Calcd for  $\text{C}_{16}\text{H}_{15}\text{O}_2^+$  239.1067; Found 239.1063. **Optical Rotation:**  $[\alpha]_{\text{D}}^{23} = +30.0$  ( $c = 1.00$ ,  $\text{CHCl}_3$ ). The enantiomeric excess was determined by HPLC on Chiral OD-3 column, 254 nm, 25 °C,  $n$ -hexane:  $i$ -PrOH = 90:10; flow 1.0 mL/min;  $t_{\text{R}}$  (major) = 8.39 min.

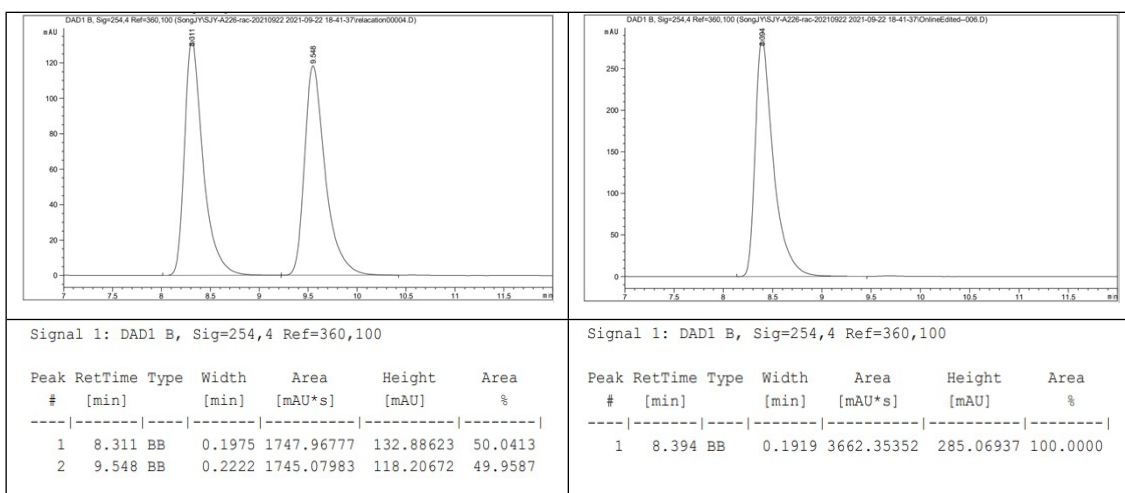

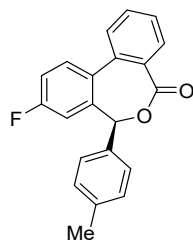

**(S)-9-fluoro-7-(p-tolyl)dibenzo[*c,e*]oxepin-5(7H)-one (4n):** 99% yield, 98% ee.  $^1\text{H}$  NMR (400 MHz,  $\text{CDCl}_3$ )  $\delta$  8.02 (d,  $J = 7.8$  Hz, 1H), 7.73 (t,  $J = 8.4$  Hz, 1H), 7.66 – 7.53 (m, 3H), 7.38 (d,  $J = 7.8$  Hz, 2H), 7.28 (d,  $J = 8.0$  Hz, 2H), 7.18 (td,  $J = 8.3, 2.7$  Hz, 1H), 6.53 (dd,  $J = 9.5, 2.7$  Hz, 1H), 6.16 (s, 1H), 2.42 (s, 3H).  $^{13}\text{C}$  NMR (101 MHz,  $\text{CDCl}_3$ )  $\delta$  169.41, 163.96, 138.80, 136.61, 134.61, 132.93, 132.23, 131.78, 130.75, 129.57, 128.94, 128.76, 127.35, 116.80, 116.59, 114.65, 114.42, 78.65, 21.42. **HRMS (ESI)  $m/z$ :**  $[\text{M}+\text{H}]^+$  Calcd for  $\text{C}_{21}\text{H}_{16}\text{FO}_2^+$  319.1129; Found 319.1125. **Optical Rotation:**  $[\alpha]_{\text{D}}^{23} = -62.1$  ( $c = 1.00$ ,  $\text{CHCl}_3$ ). The enantiomeric excess was determined by HPLC on Chiral OD-3 column, 254 nm, 25 °C, *n*-hexane: *i*-PrOH = 90:10; flow 1.0 mL/min;  $t_{\text{R}}$  (major) = 7.13 min,  $t_{\text{R}}$  (minor) = 10.69 min.

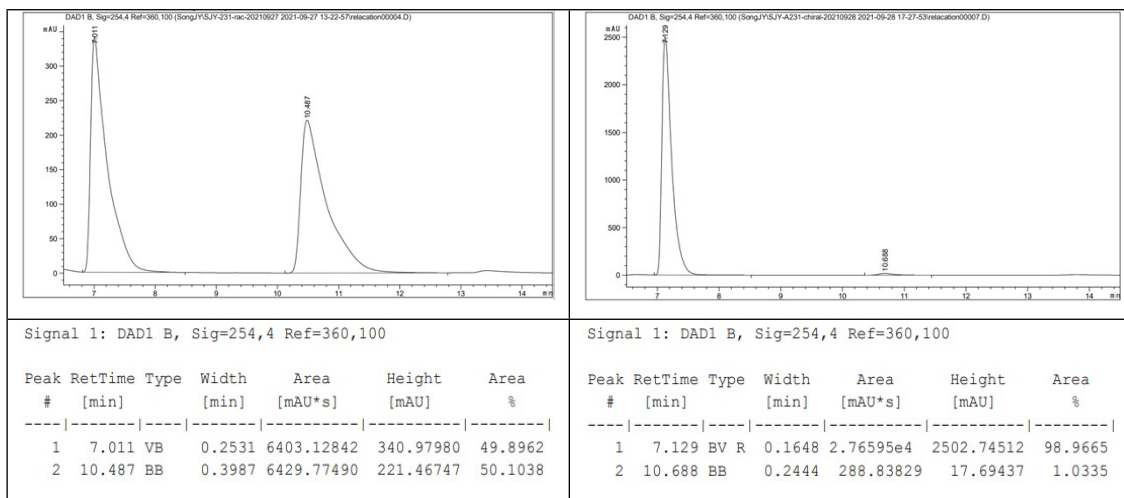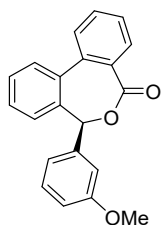

**(S)-7-(3-methoxyphenyl)dibenzo[*c,e*]oxepin-5(7H)-one (4o):** 99% yield, 89% ee.  $^1\text{H}$  NMR (400 MHz,  $\text{CDCl}_3$ )  $\delta$  8.00 (d,  $J = 7.8$  Hz, 1H), 7.70 (t,  $J = 7.6$  Hz, 1H), 7.61

(dd,  $J = 15.5, 8.2$  Hz, 2H), 7.55 – 7.38 (m, 6H), 7.01 (d,  $J = 8.6$  Hz, 1H), 6.32 (s, 1H), 6.22 (s, 1H), 3.69 (s, 3H).  $^{13}\text{C}$  NMR (101 MHz,  $\text{CDCl}_3$ )  $\delta$  169.74, 159.83, 140.25, 137.42, 135.78, 132.83, 131.73, 131.17, 130.42, 130.29, 128.76, 128.71, 128.07, 127.53, 114.49, 113.46, 79.09, 55.44. **HRMS (ESI)**  $m/z$ :  $[\text{M}+\text{H}]^+$  Calcd for  $\text{C}_{21}\text{H}_{17}\text{O}_3^+$  317.1172; Found 317.1168. **Optical Rotation:**  $[\alpha]_{\text{D}}^{23} = -20.8$  ( $c = 1.00$ ,  $\text{CHCl}_3$ ). The enantiomeric excess was determined by HPLC on Chiral OD-3 column, 254 nm, 25 °C,  $n$ -hexane:  $i$ -PrOH = 90:10; flow 1.0 mL/min;  $t_{\text{R}}$  (major) = 11.26 min,  $t_{\text{R}}$  (minor) = 12.98 min.

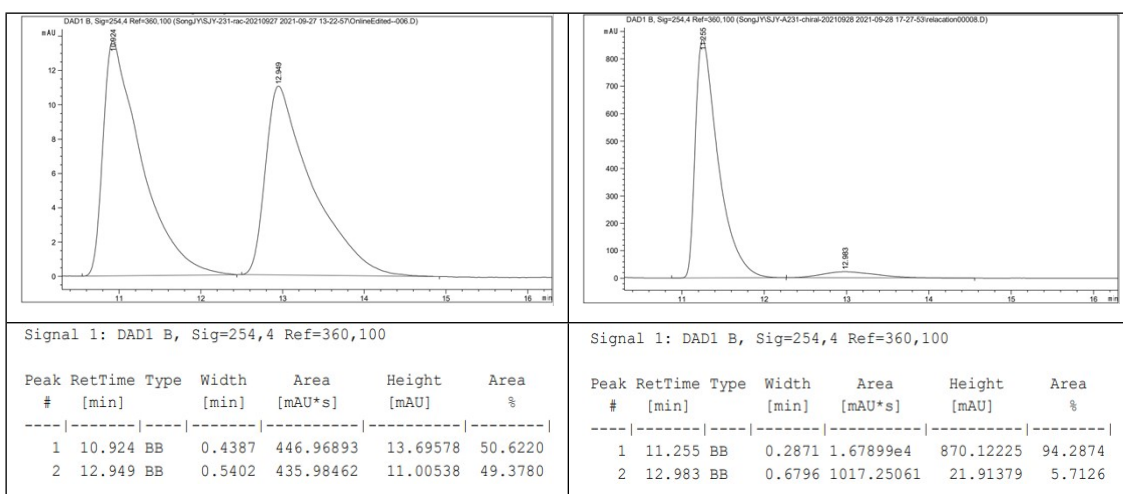

## 6. NMR Spectra

$^1\text{H}$  NMR (600 MHz,  $\text{CDCl}_3$ ) of compound **1a**

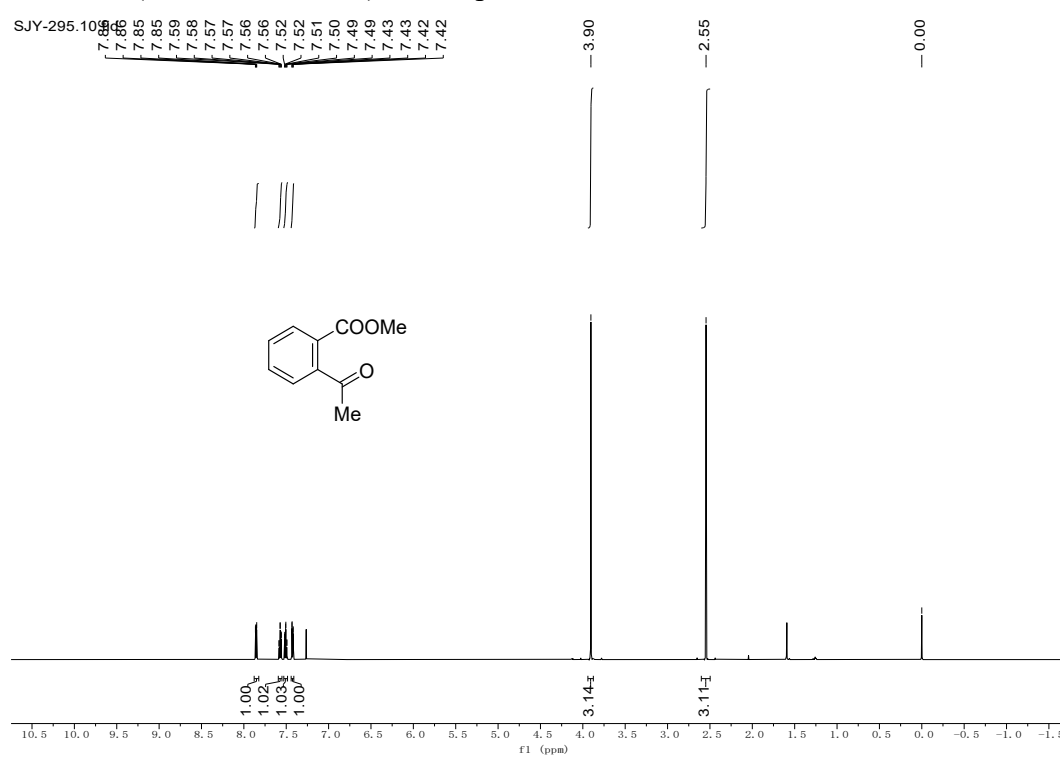

$^{13}\text{C}$  NMR (151 MHz,  $\text{CDCl}_3$ ) of compound **1a**

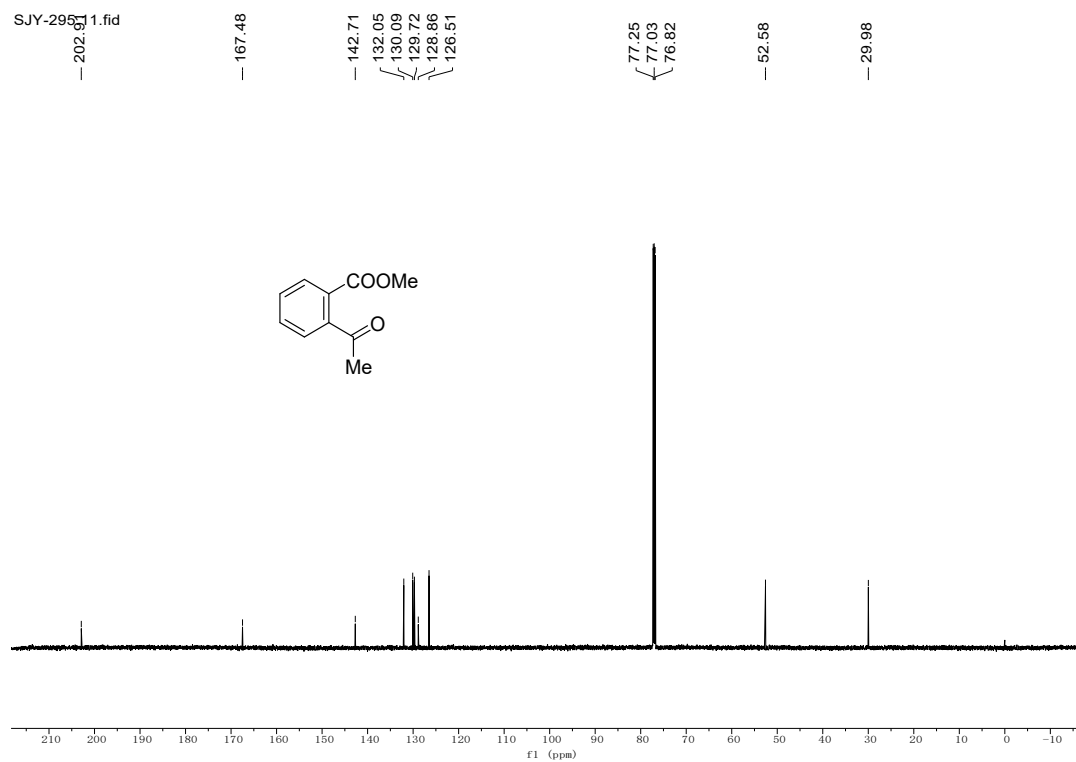

# $^1\text{H}$ NMR (400 MHz, $\text{CDCl}_3$ ) of compound **1b**

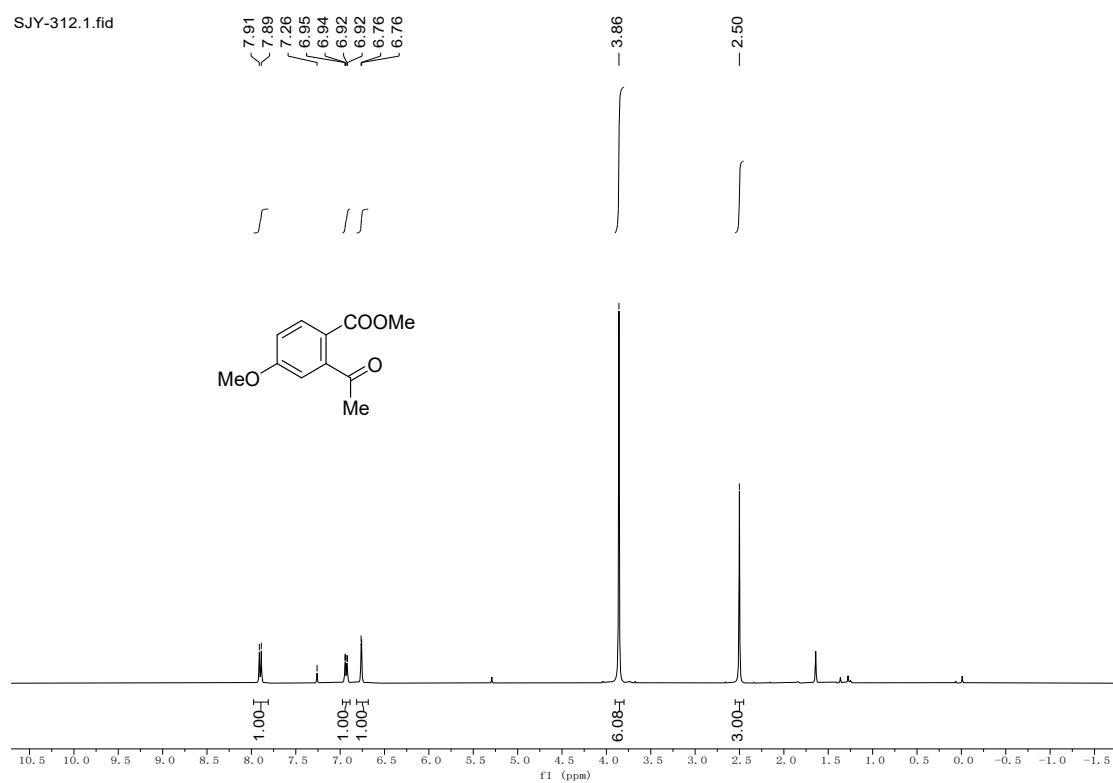

# $^{13}\text{C}$ NMR (101 MHz, $\text{CDCl}_3$ ) of compound **1b**

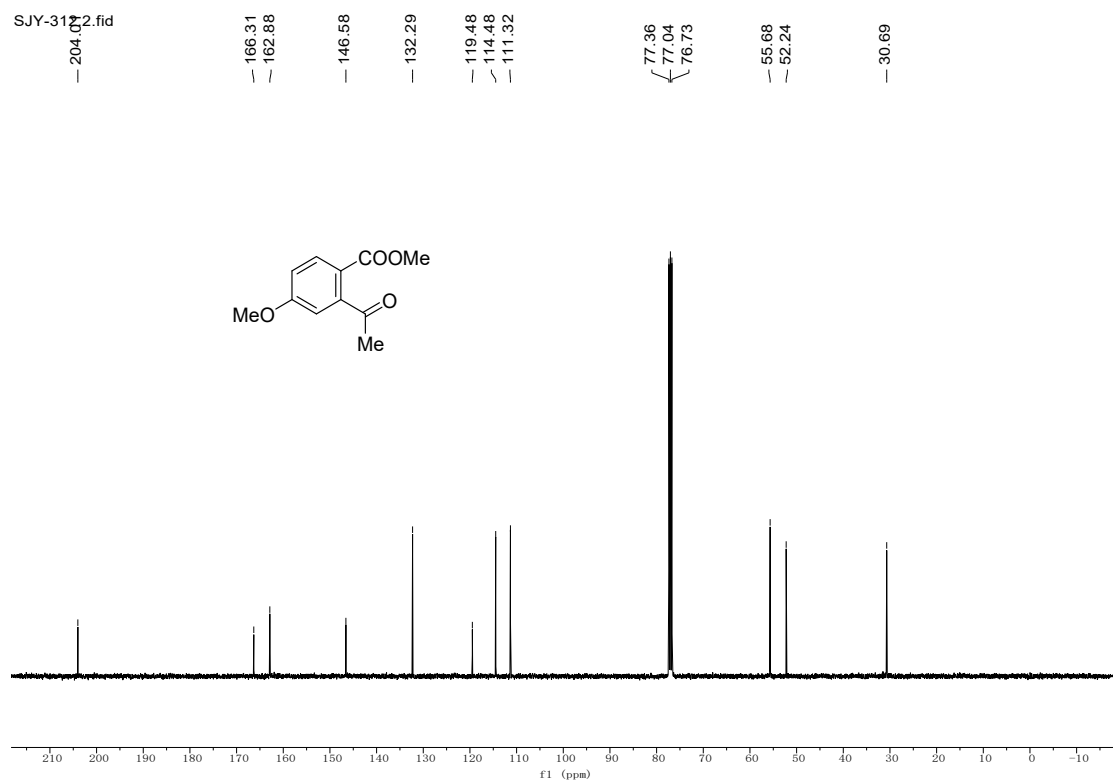

# $^1\text{H}$ NMR (600 MHz, $\text{CDCl}_3$ ) of compound **1c**

SJY-315.10.fid

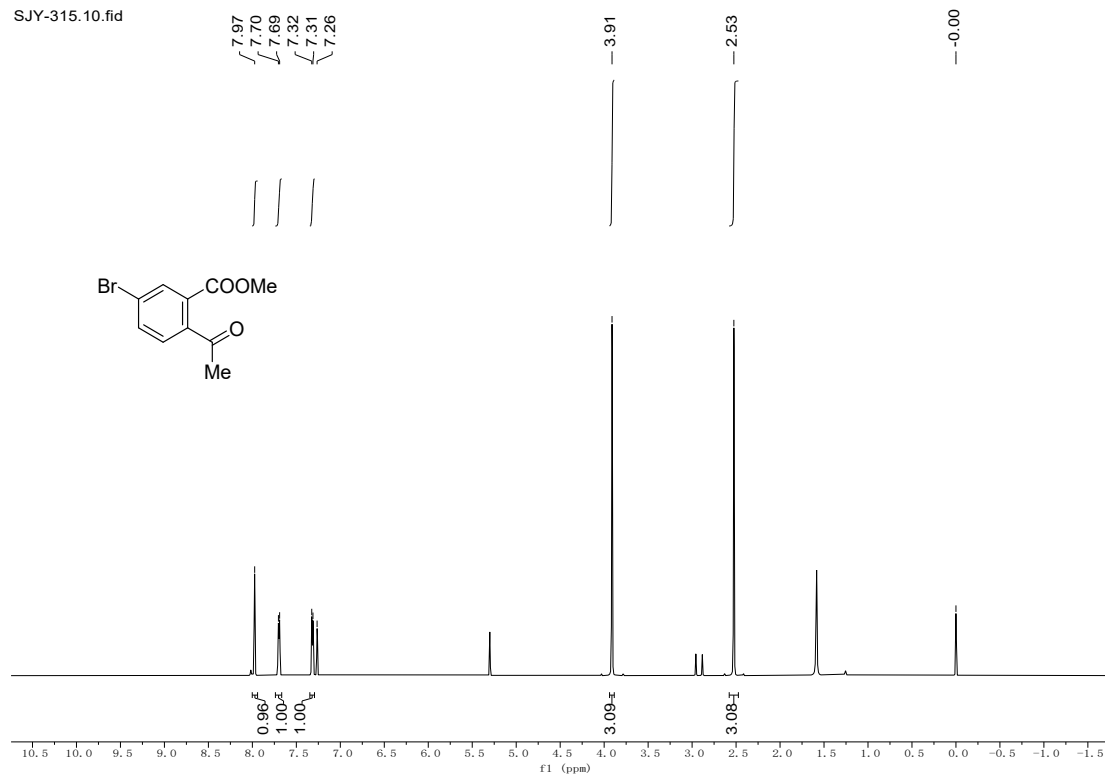

# $^{13}\text{C}$ NMR (151 MHz, $\text{CDCl}_3$ ) of compound **1c**

SJY-315.31.fid

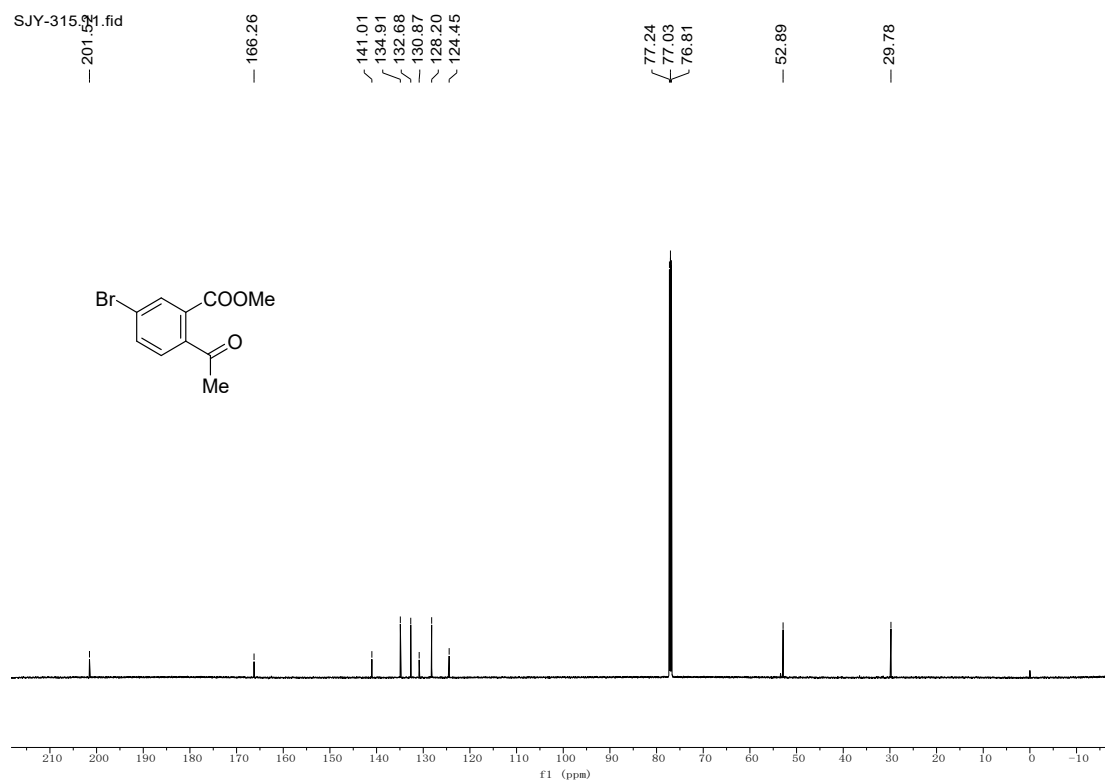



# $^1\text{H}$ NMR (600 MHz, $\text{CDCl}_3$ ) of compound **1d**

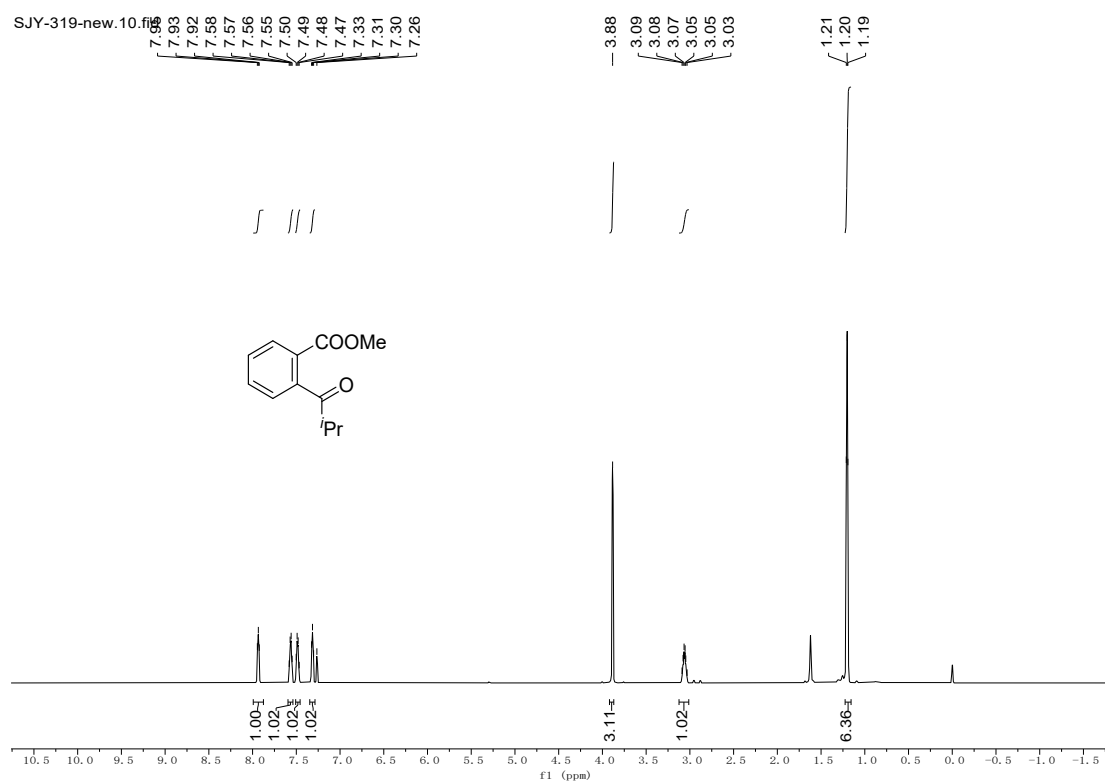

# $^{13}\text{C}$ NMR (151 MHz, $\text{CDCl}_3$ ) of compound **1d**

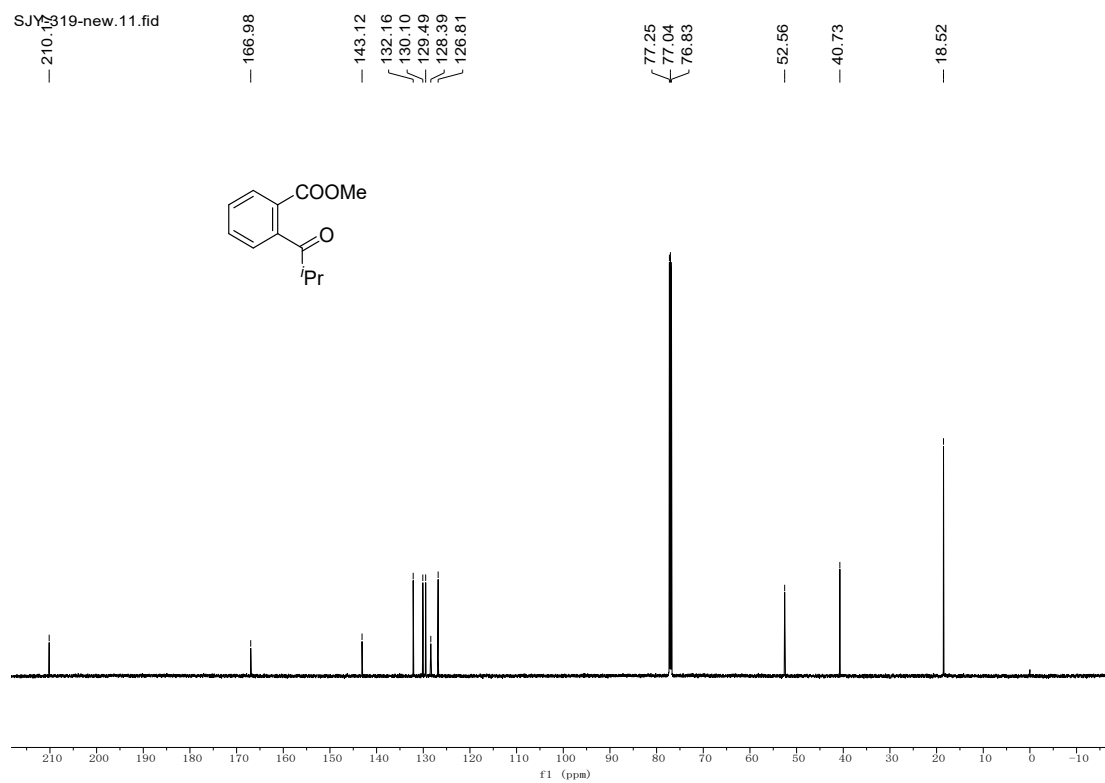

$^1\text{H}$  NMR (400 MHz,  $\text{CDCl}_3$ ) of compound **1f**

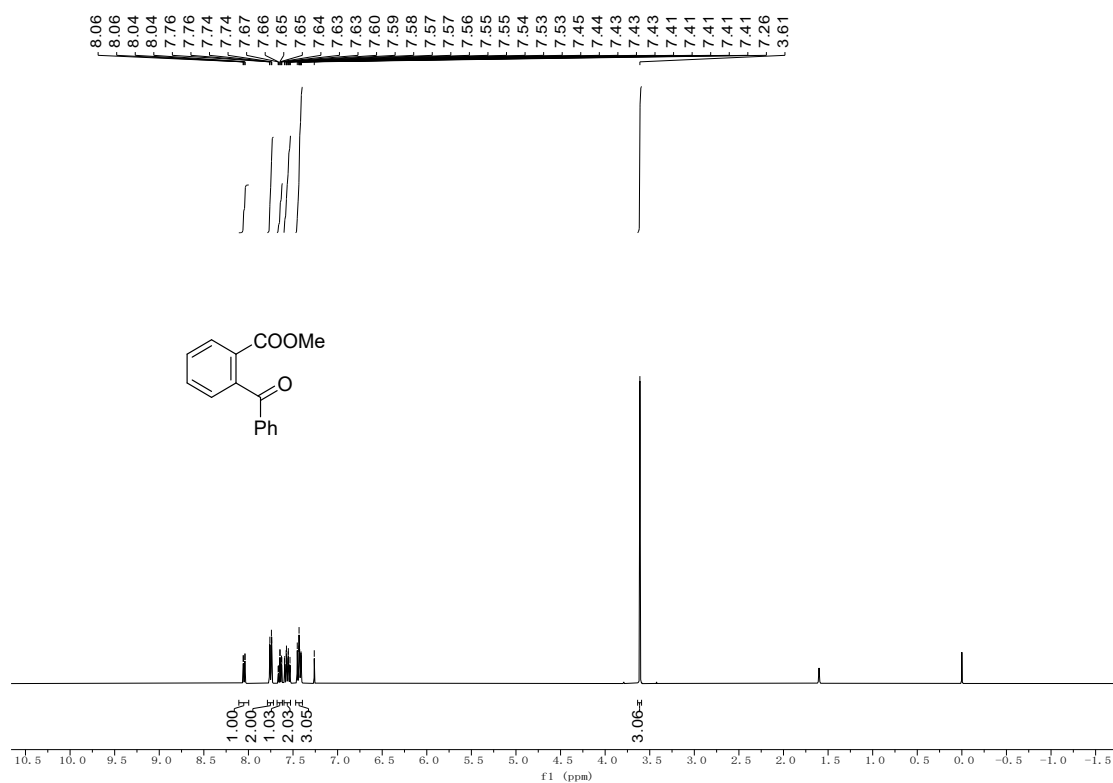

$^{13}\text{C}$  NMR (101 MHz,  $\text{CDCl}_3$ ) of compound **1f**

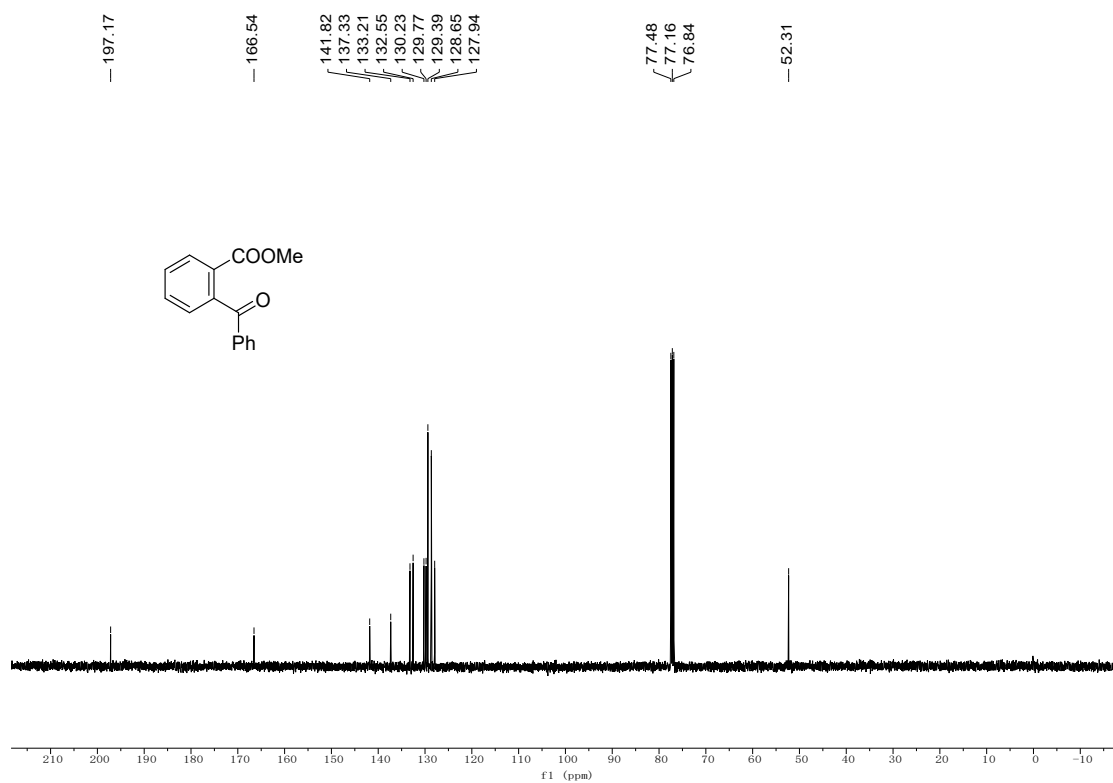

# $^1\text{H}$ NMR (400 MHz, $\text{CDCl}_3$ ) of compound **1h**

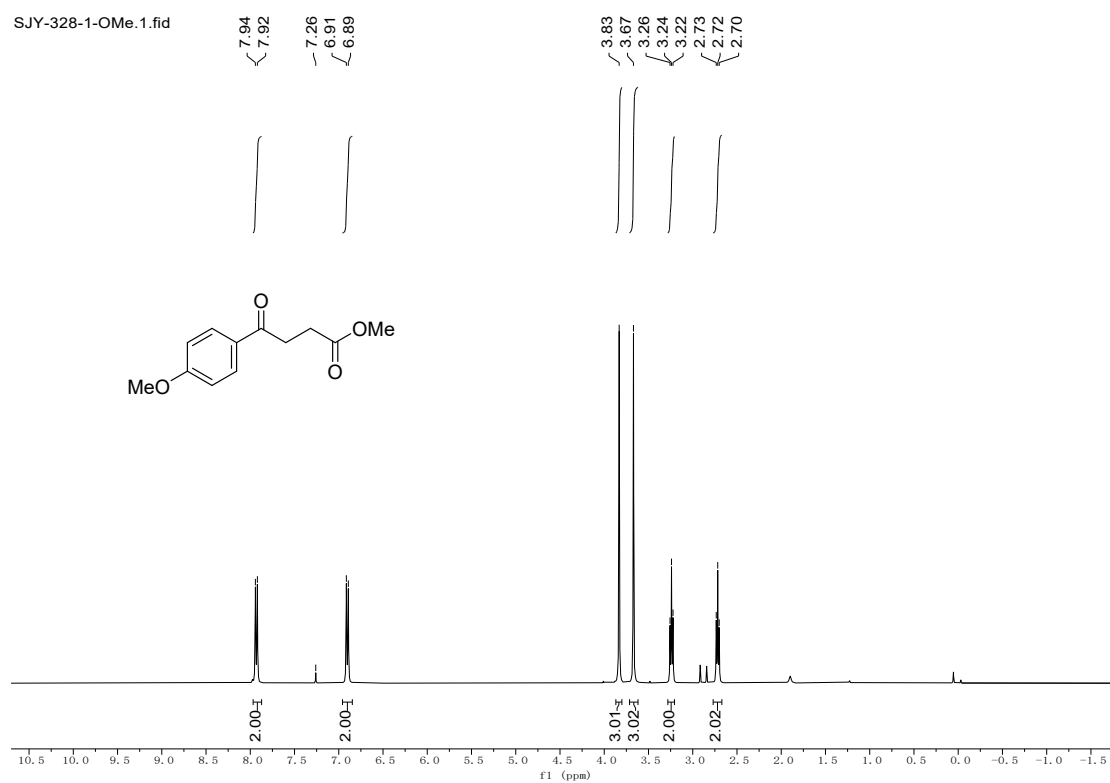

# $^{13}\text{C}$ NMR (101 MHz, $\text{CDCl}_3$ ) of compound **1h**

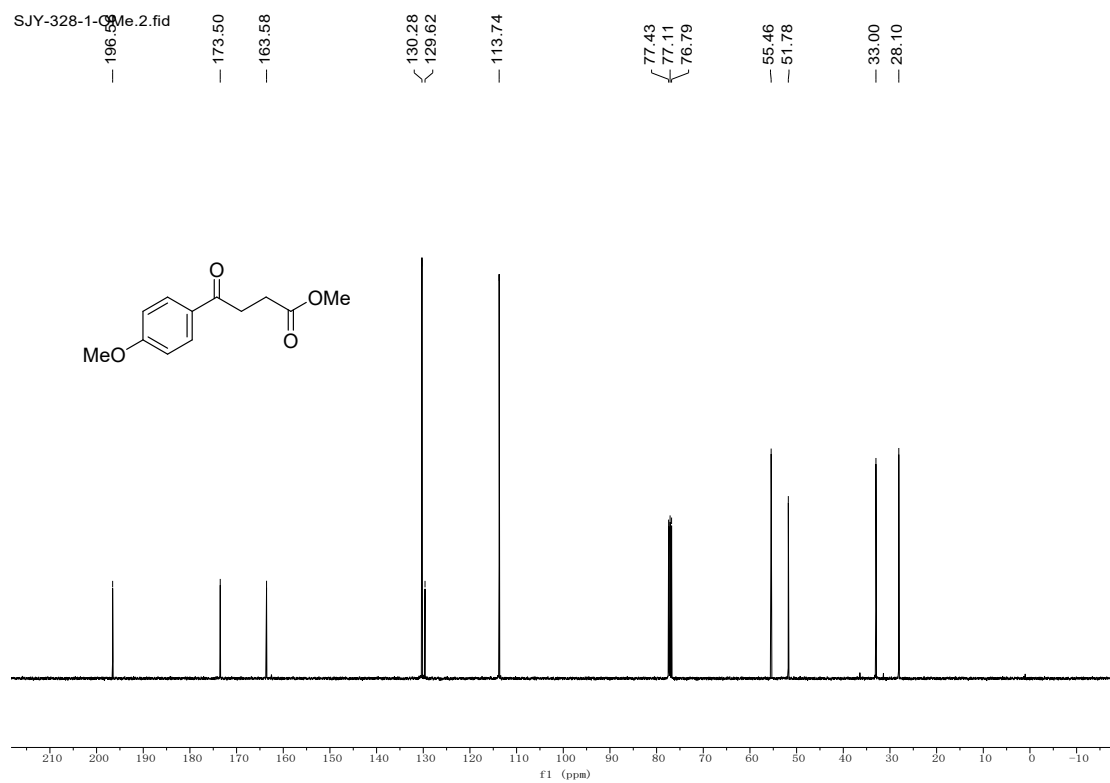

# <sup>1</sup>H NMR (400 MHz, CDCl<sub>3</sub>) of compound **1i**

SJY-328-2-F.1.fid

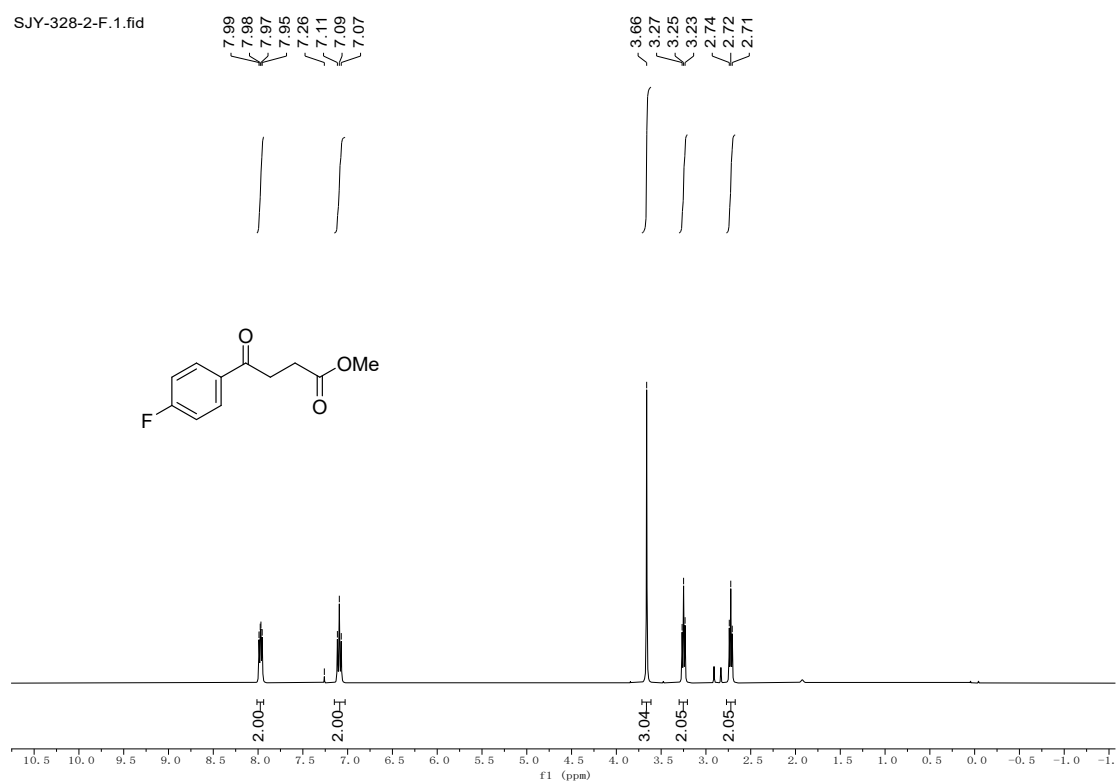

# <sup>13</sup>C NMR (101 MHz, CDCl<sub>3</sub>) of compound **1i**

SJY-328-2-F.2.fid

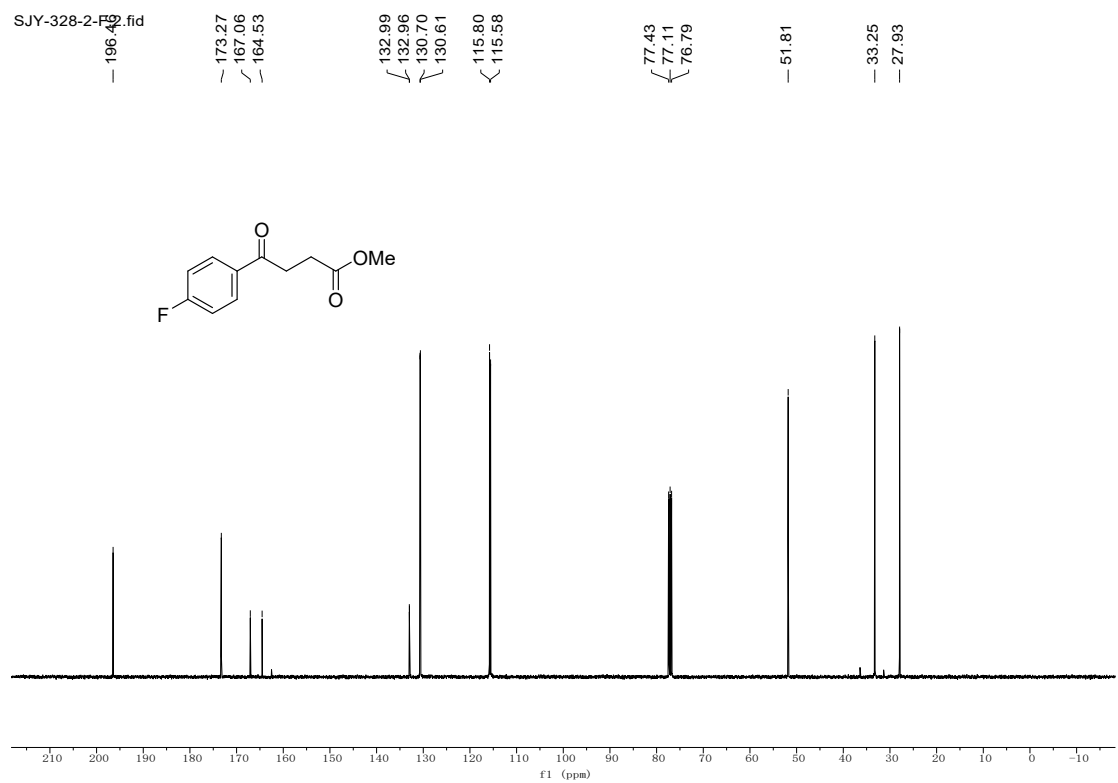

# $^1\text{H}$ NMR (400 MHz, $\text{CDCl}_3$ ) of compound **1j**

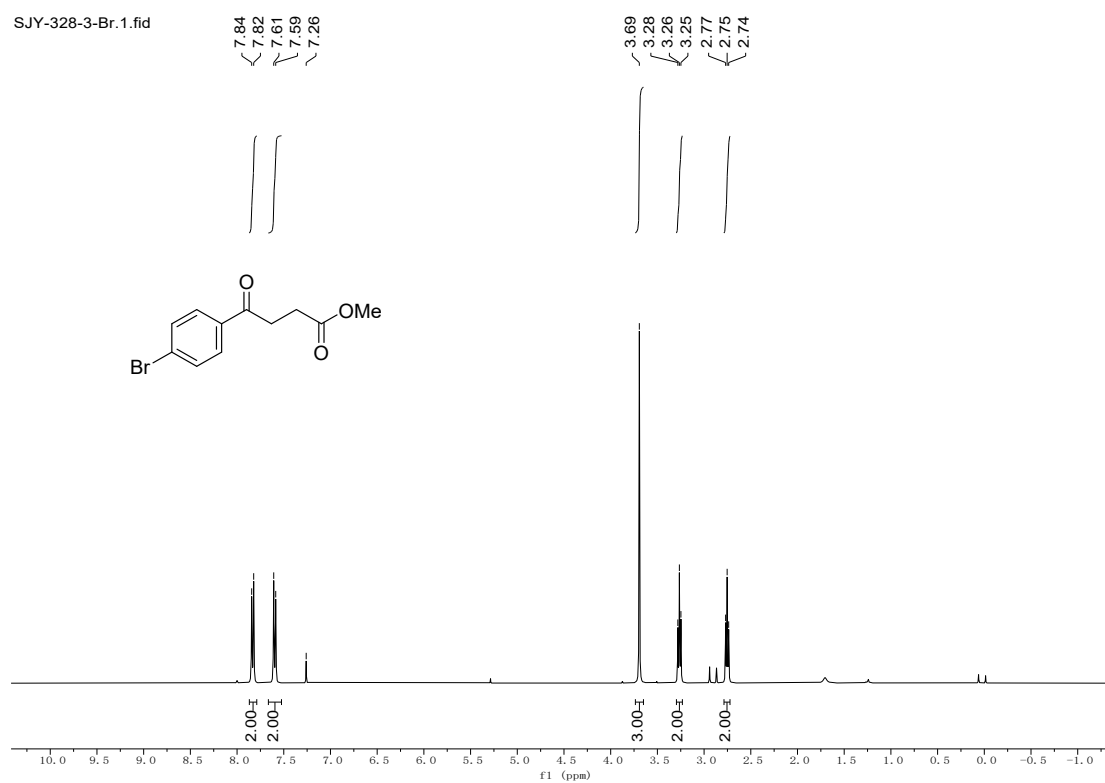

# $^{13}\text{C}$ NMR (101 MHz, $\text{CDCl}_3$ ) of compound **1j**

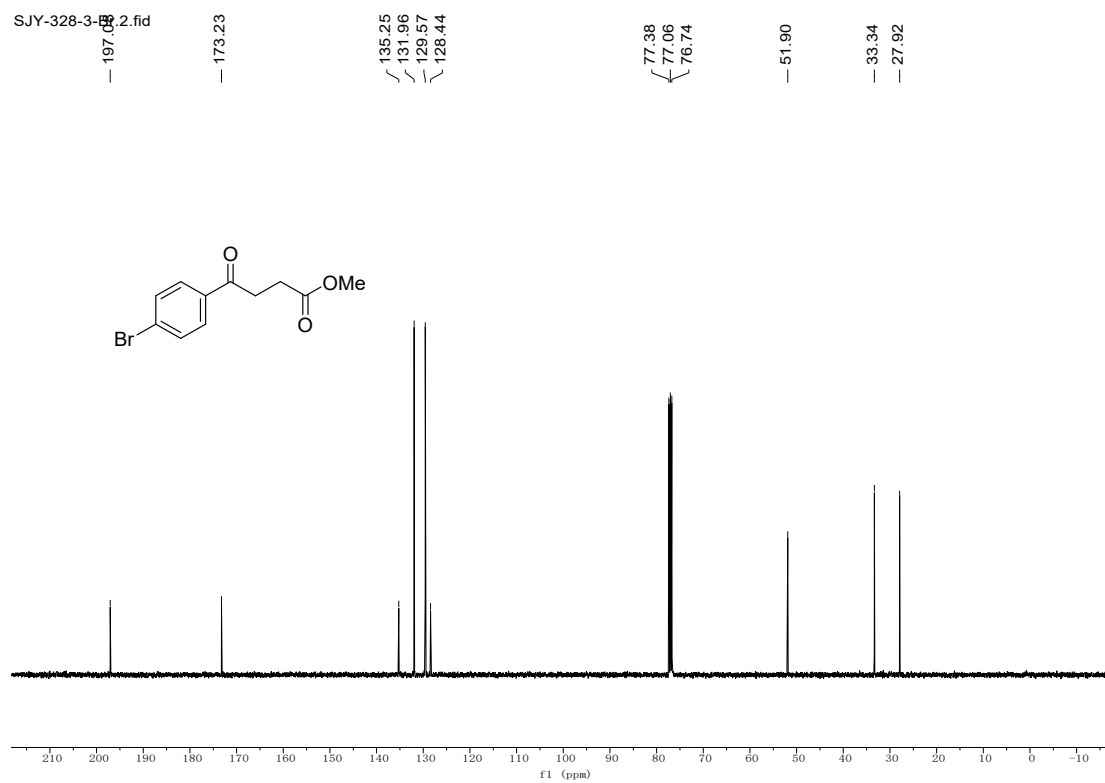

# $^1\text{H}$ NMR (400 MHz, $\text{CDCl}_3$ ) of compound **2a**

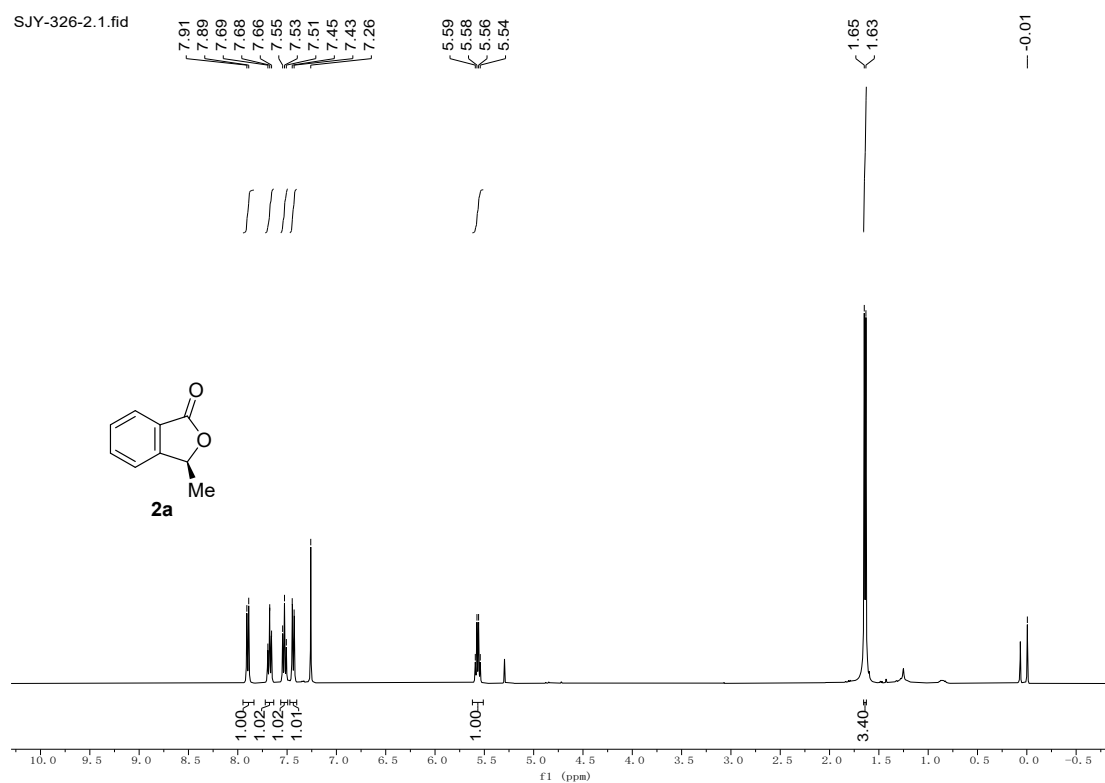

# $^{13}\text{C}$ NMR (101 MHz, $\text{CDCl}_3$ ) of compound **2a**

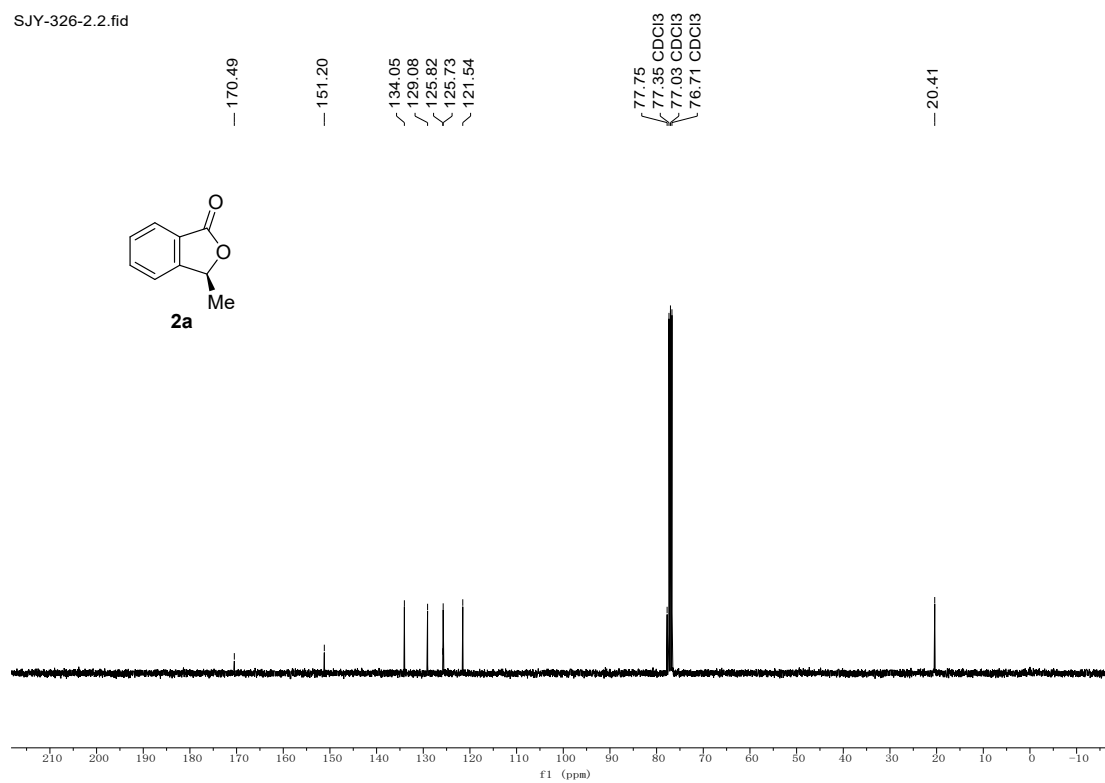

$^1\text{H}$  NMR (600 MHz,  $\text{CDCl}_3$ ) of compound **2b**

SJY-2b-01.12.fid

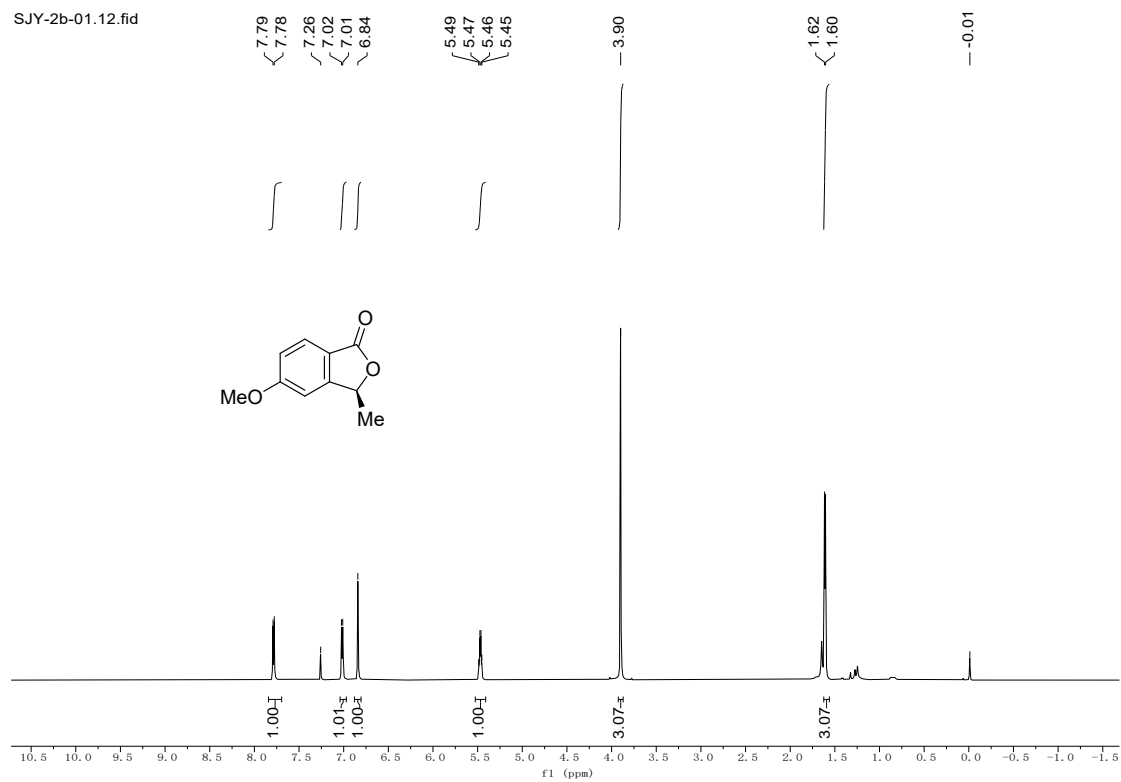

$^{13}\text{C}$  NMR (151 MHz,  $\text{CDCl}_3$ ) of compound **2b**

SJY-2b-01.13.fid

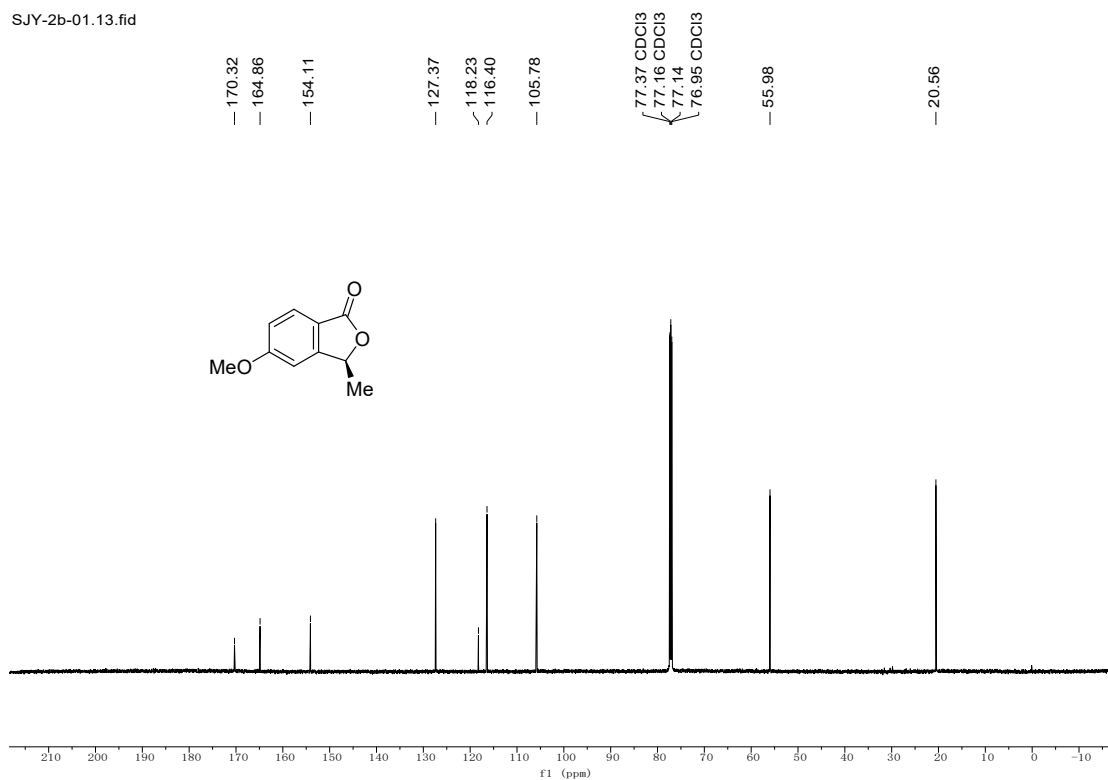

### <sup>1</sup>H NMR (400 MHz, CDCl<sub>3</sub>) of compound 2c

SJY-327-2.1.fid

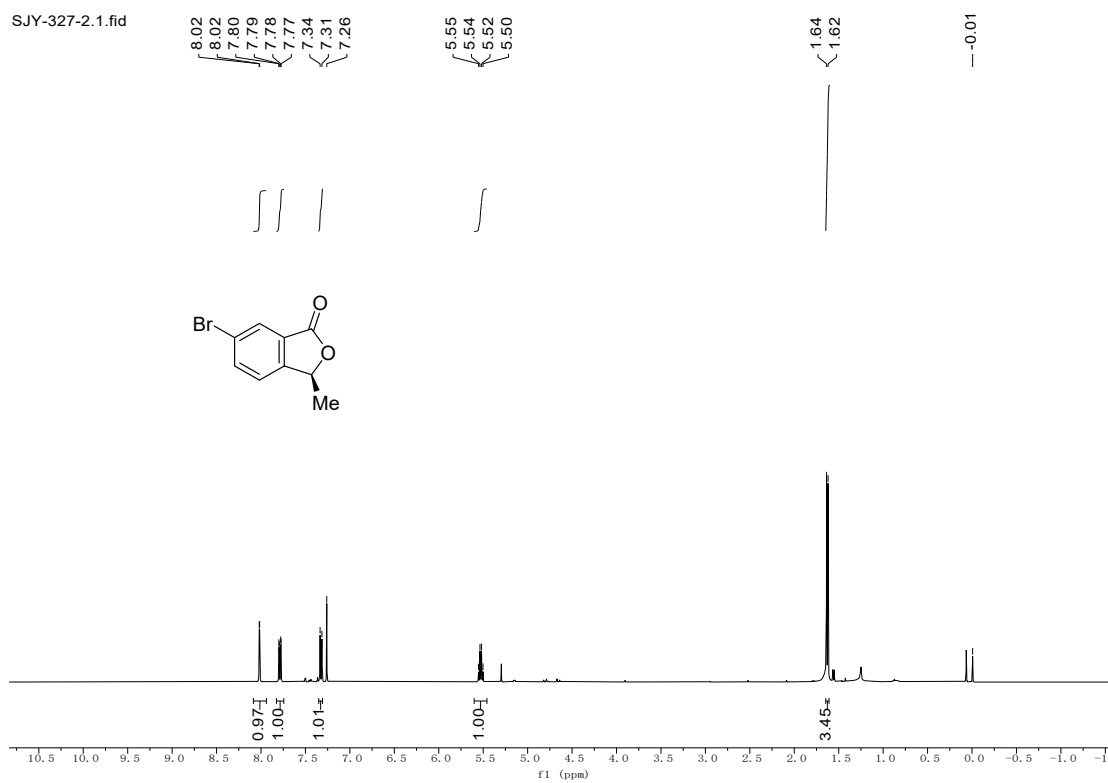



### $^{13}\text{C}$ NMR (101 MHz, $\text{CDCl}_3$ ) of compound **2c**

SJY-327-2.2.fid

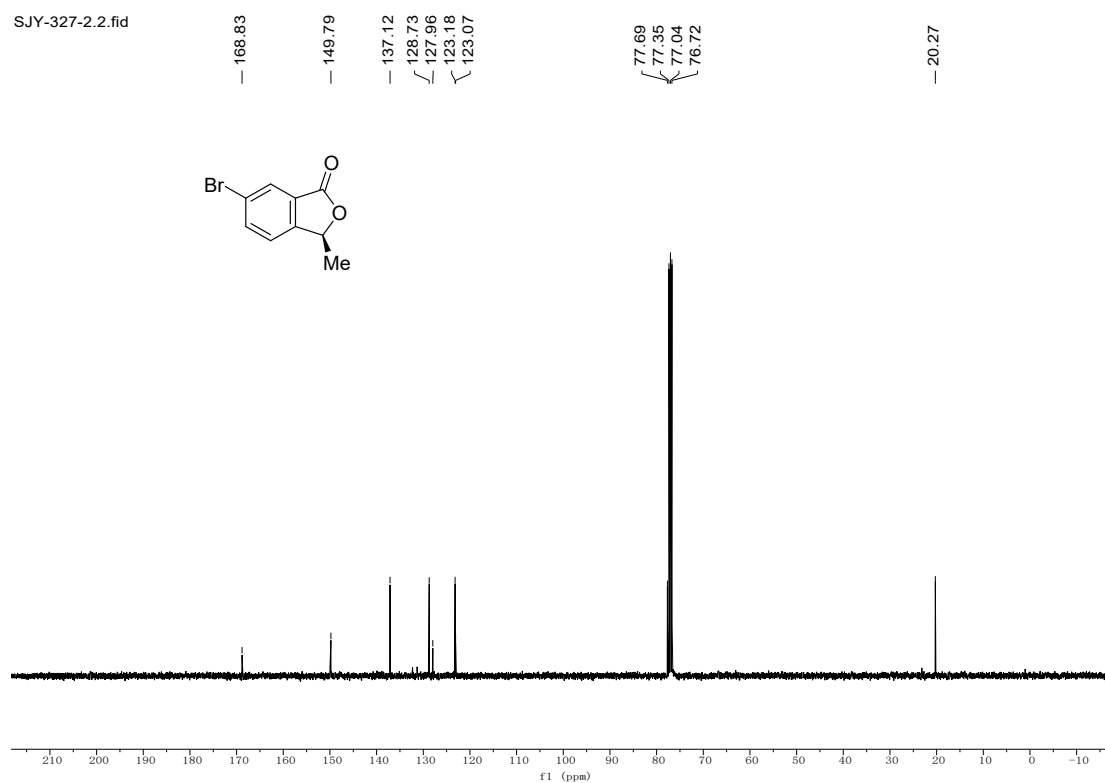

### $^1\text{H}$ NMR (600 MHz, $\text{CDCl}_3$ ) of compound **2d**

SJY-2D-0518.20.fid

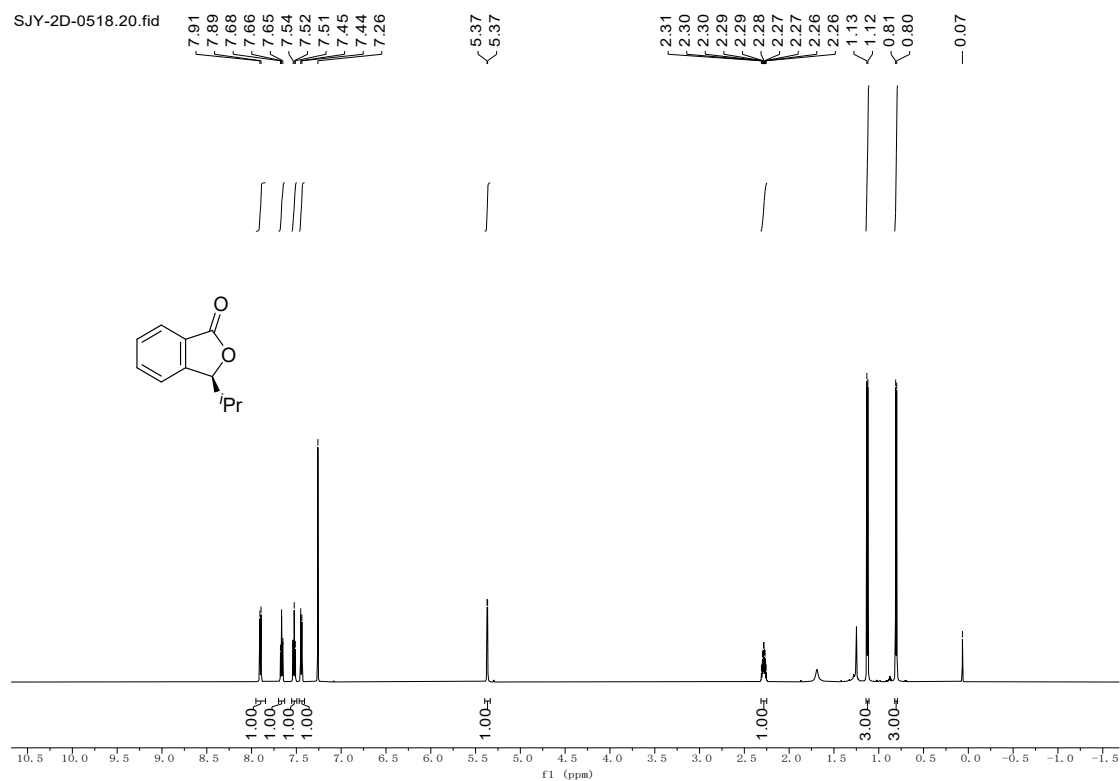

$^{13}\text{C}$  NMR (151 MHz,  $\text{CDCl}_3$ ) of compound **2d**

SJY-2d-01.11.fid

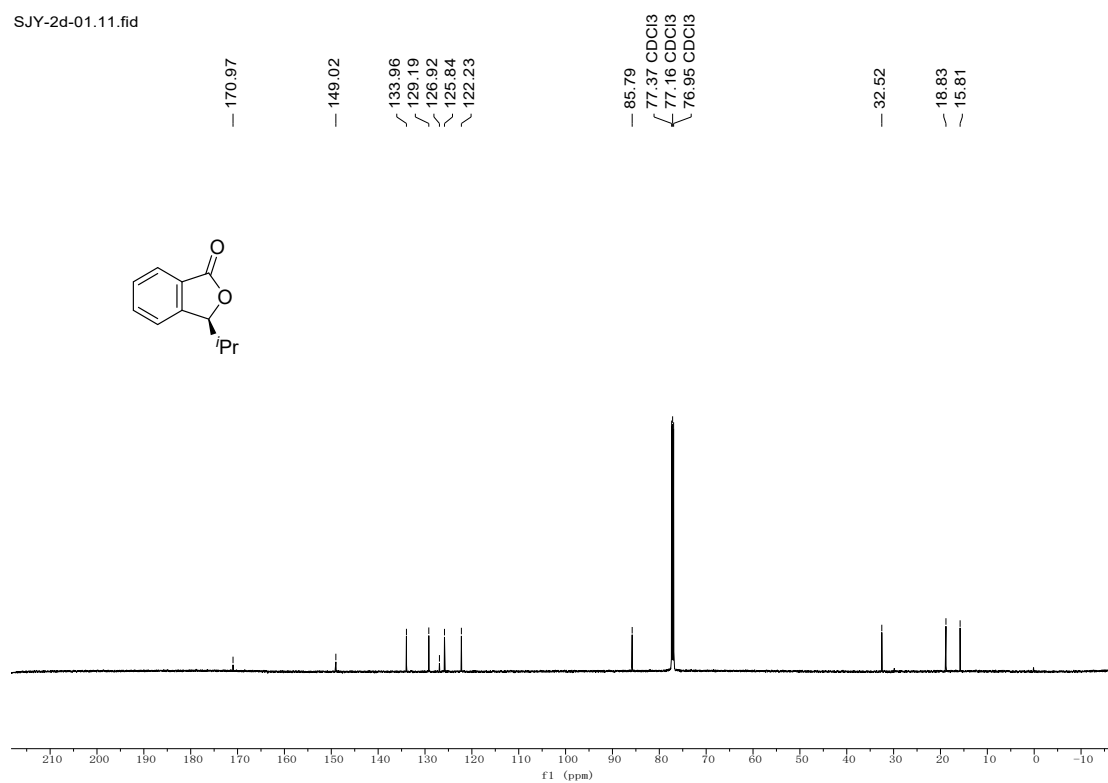

$^1\text{H}$  NMR (600 MHz,  $\text{CDCl}_3$ ) of compound **2e**

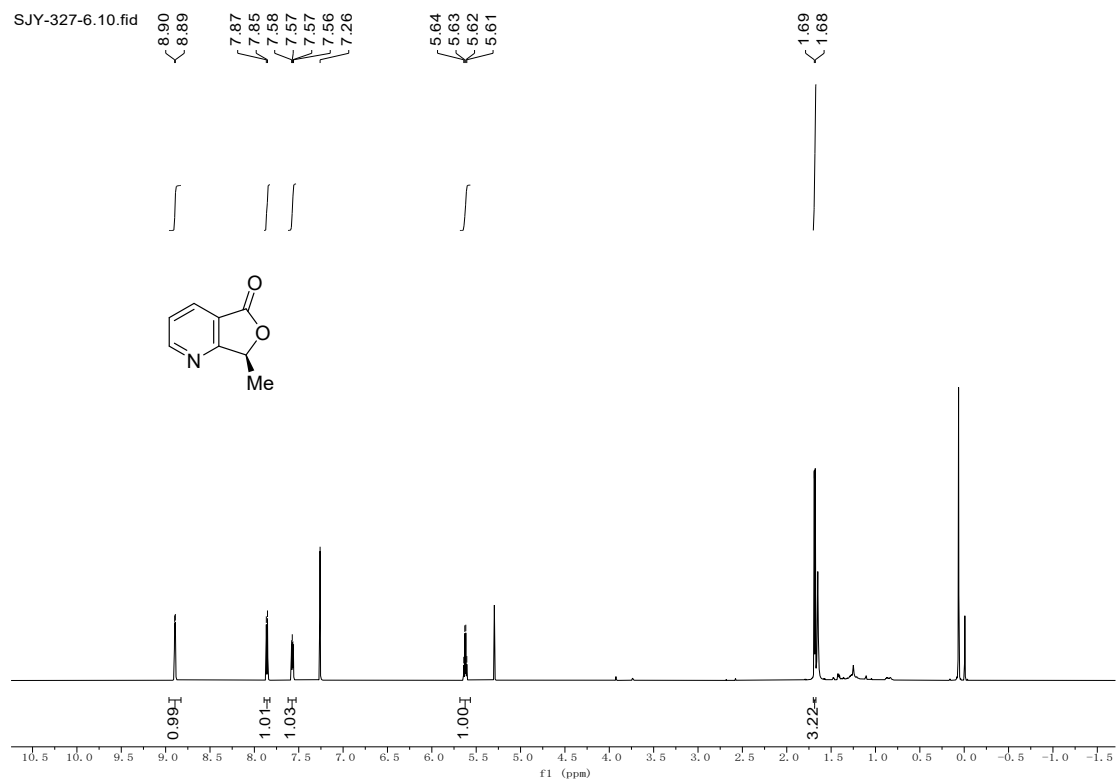

<sup>13</sup>C NMR (151 MHz, CDCl<sub>3</sub>) of compound **2e**

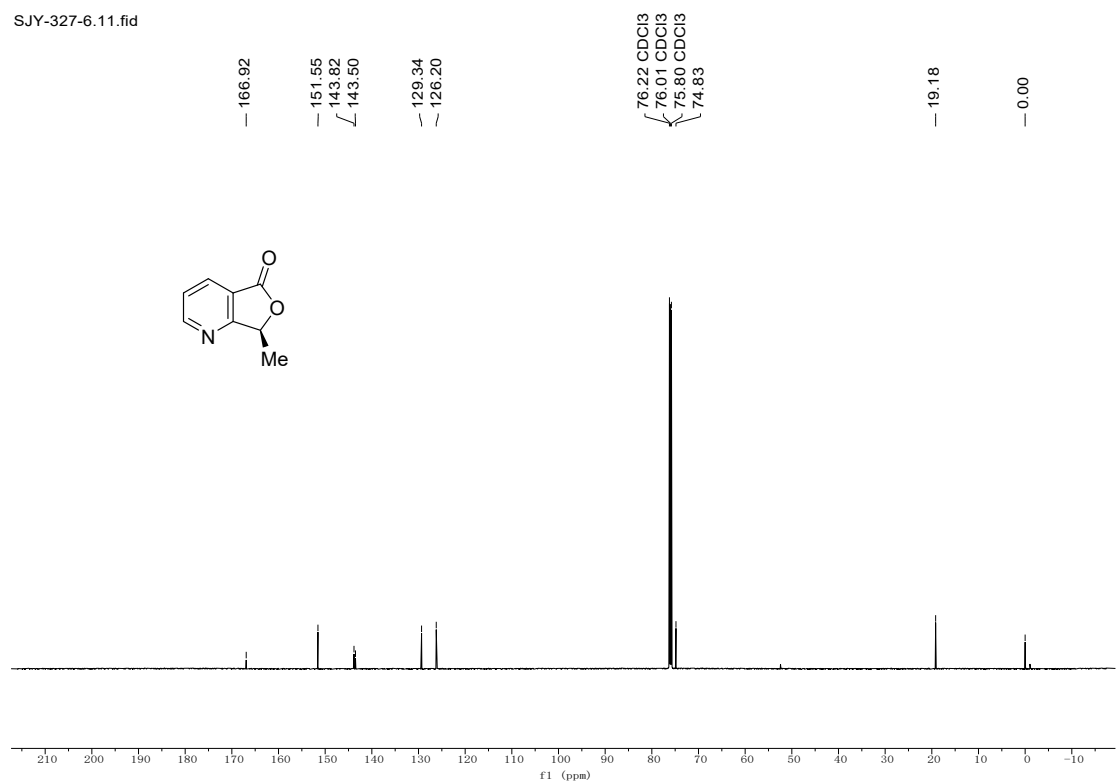

<sup>1</sup>H NMR (400 MHz, CDCl<sub>3</sub>) of compound **2g**

SJY-335-H-001.1.fid

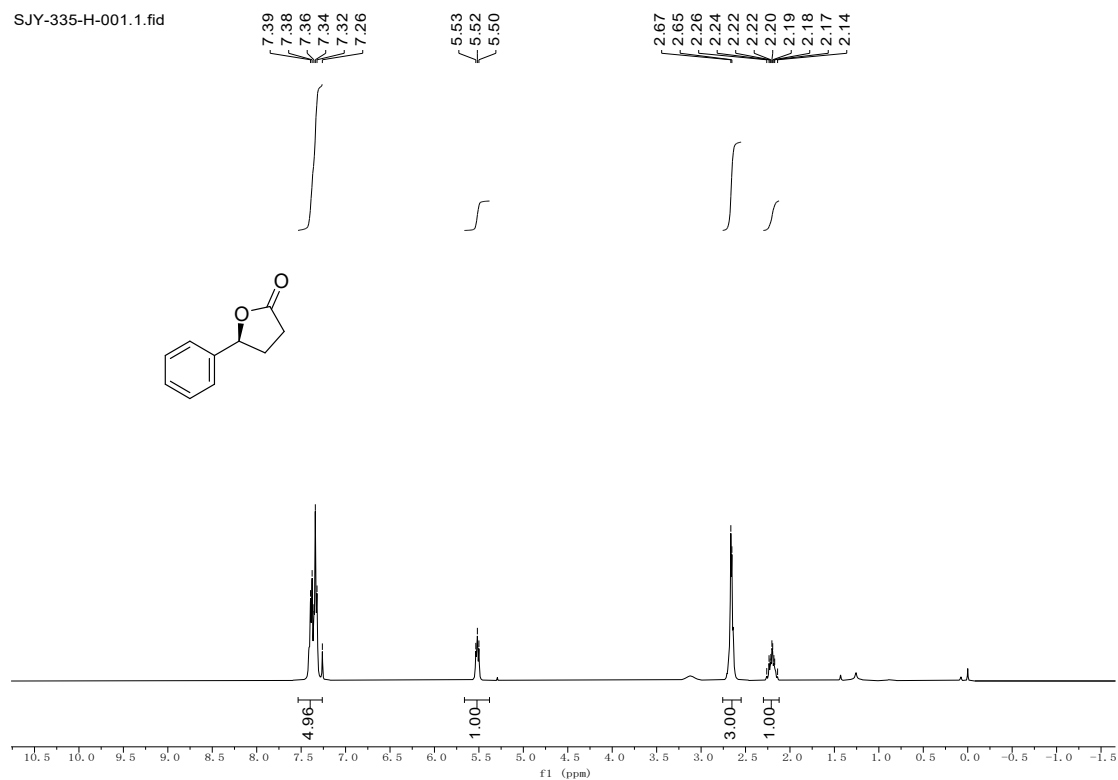

### $^{13}\text{C}$ NMR (101 MHz, $\text{CDCl}_3$ ) of compound **2g**

SJY-335-H-001.2.fid

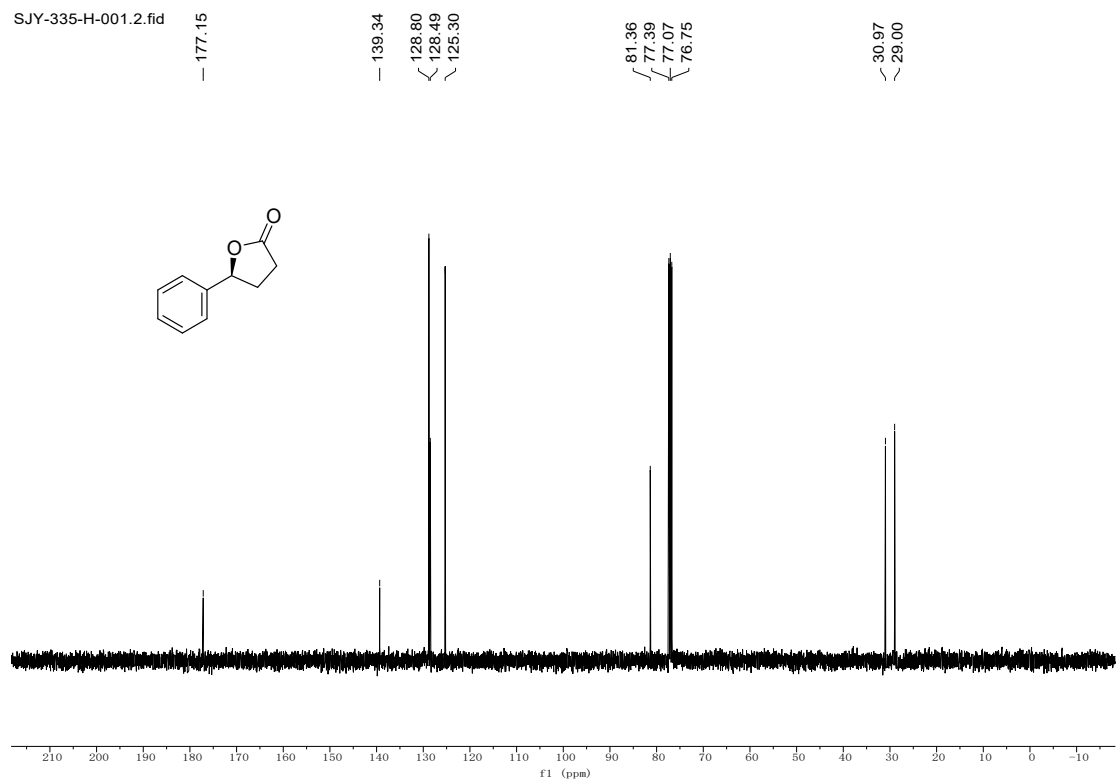

### $^1\text{H}$ NMR (400 MHz, $\text{CDCl}_3$ ) of compound **2h**

SJY-2G-0519.10.fid

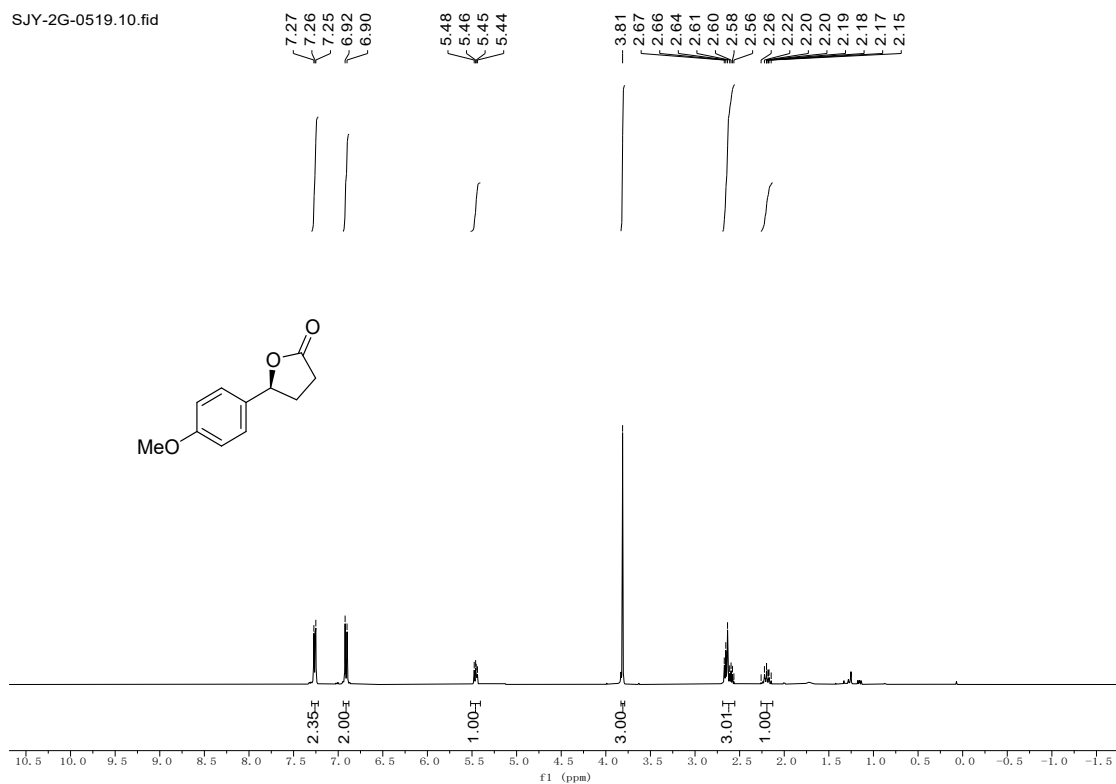

### <sup>13</sup>C NMR (101 MHz, CDCl<sub>3</sub>) of compound 2h

SJY-335-OMe-001.4.fid

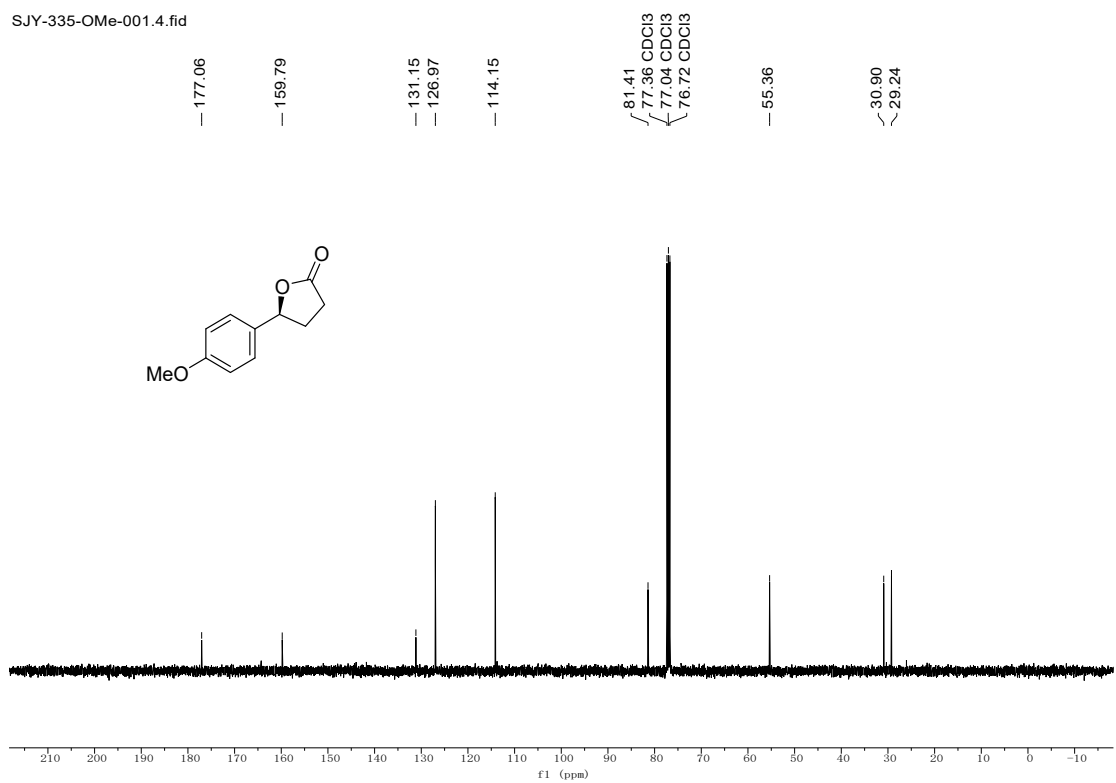

# <sup>1</sup>H NMR (400 MHz, CDCl<sub>3</sub>) of compound 2i

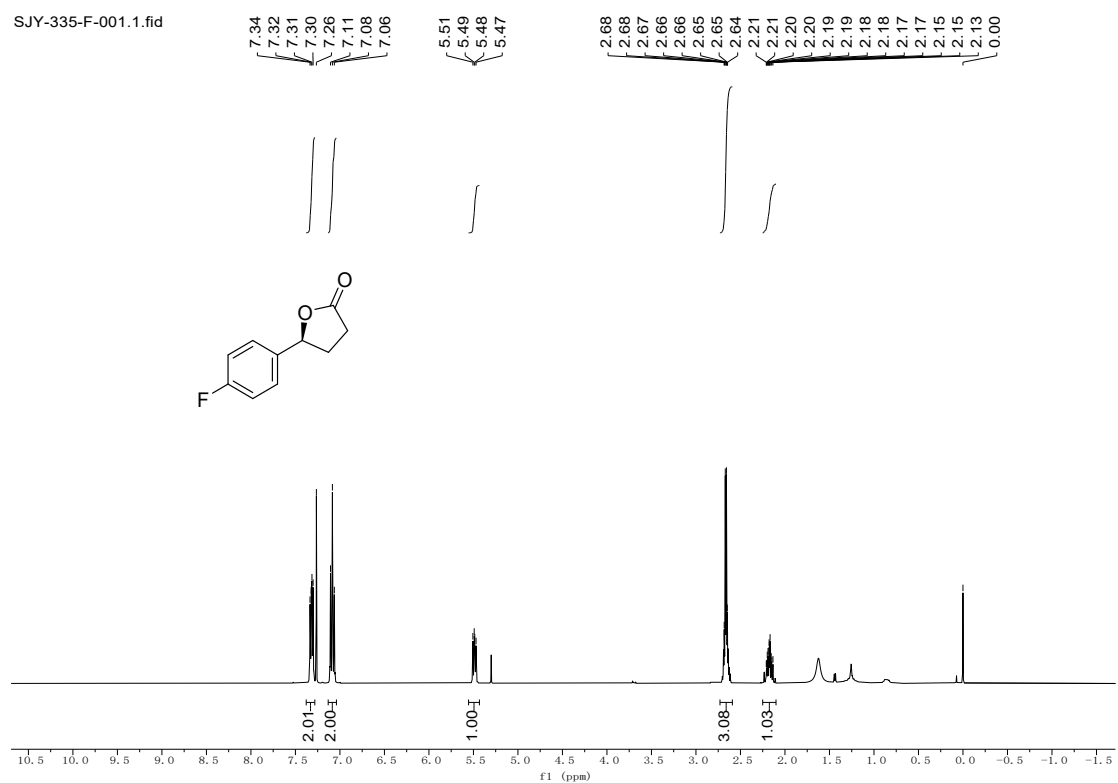

# <sup>13</sup>C NMR (101 MHz, CDCl<sub>3</sub>) of compound 2i

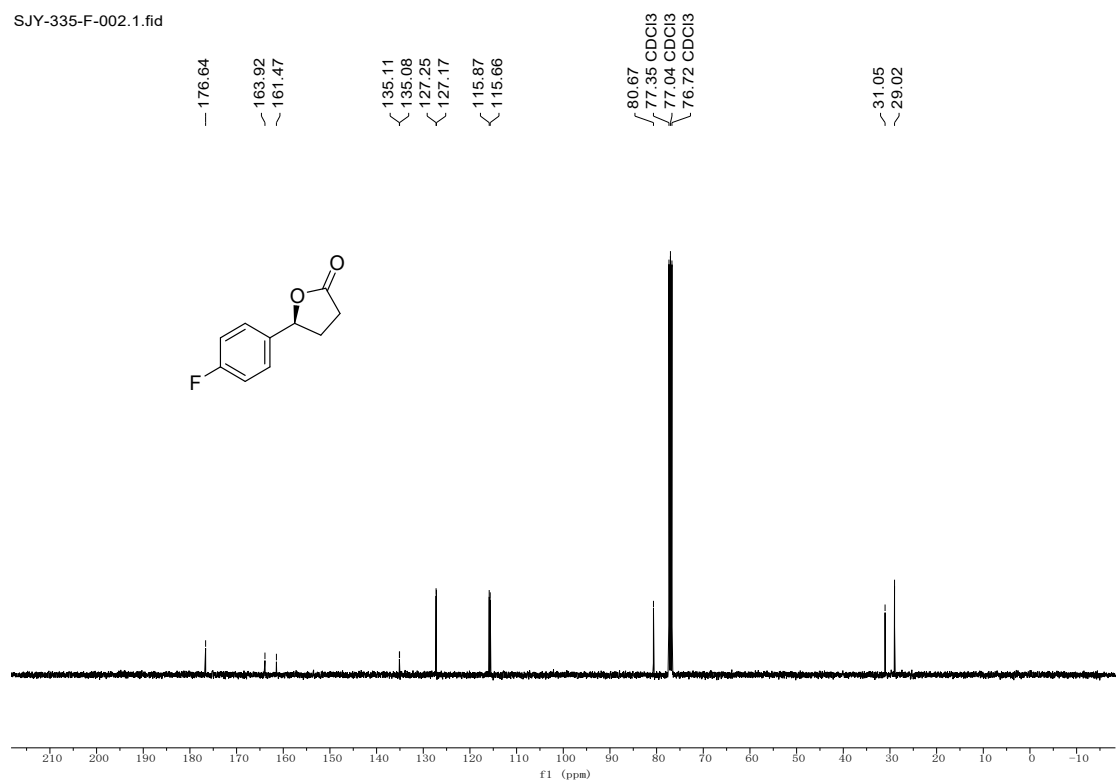

# $^1\text{H}$ NMR (400 MHz, $\text{CDCl}_3$ ) of compound **2j**

SJY-2I-0530-NEW.1.fid

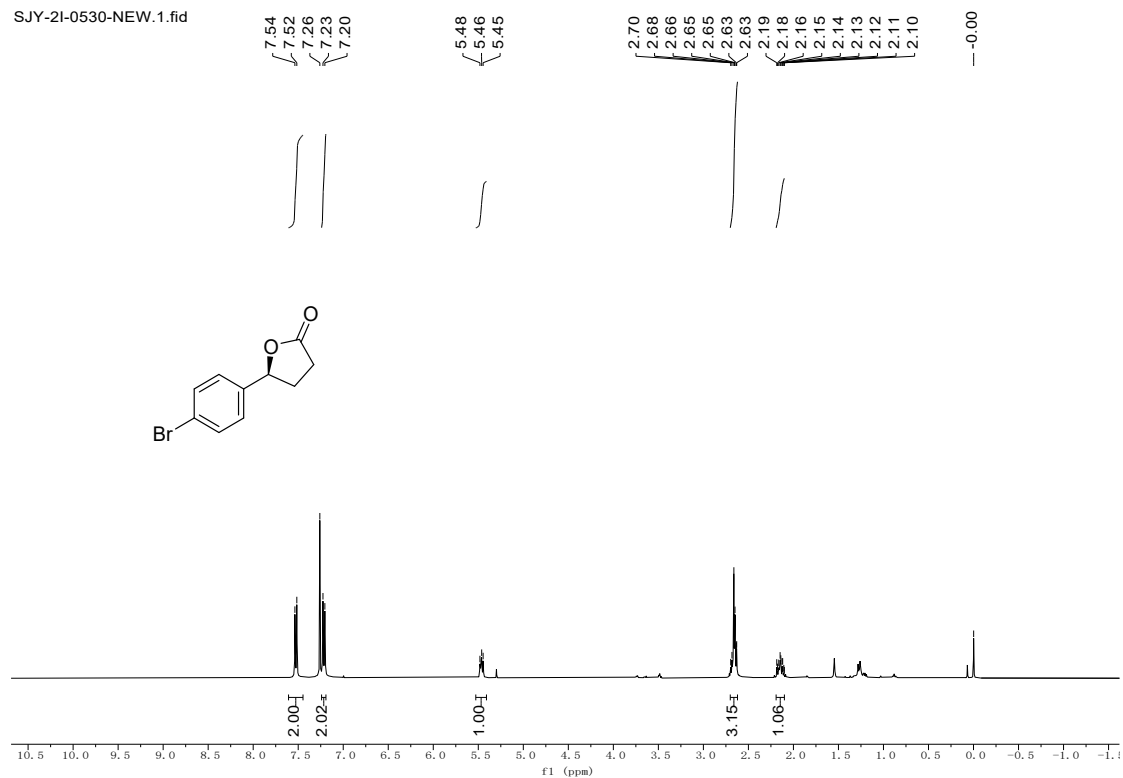

# $^{13}\text{C}$ NMR (101 MHz, $\text{CDCl}_3$ ) of compound **2j**

SJY-335-Br-001.2.fid

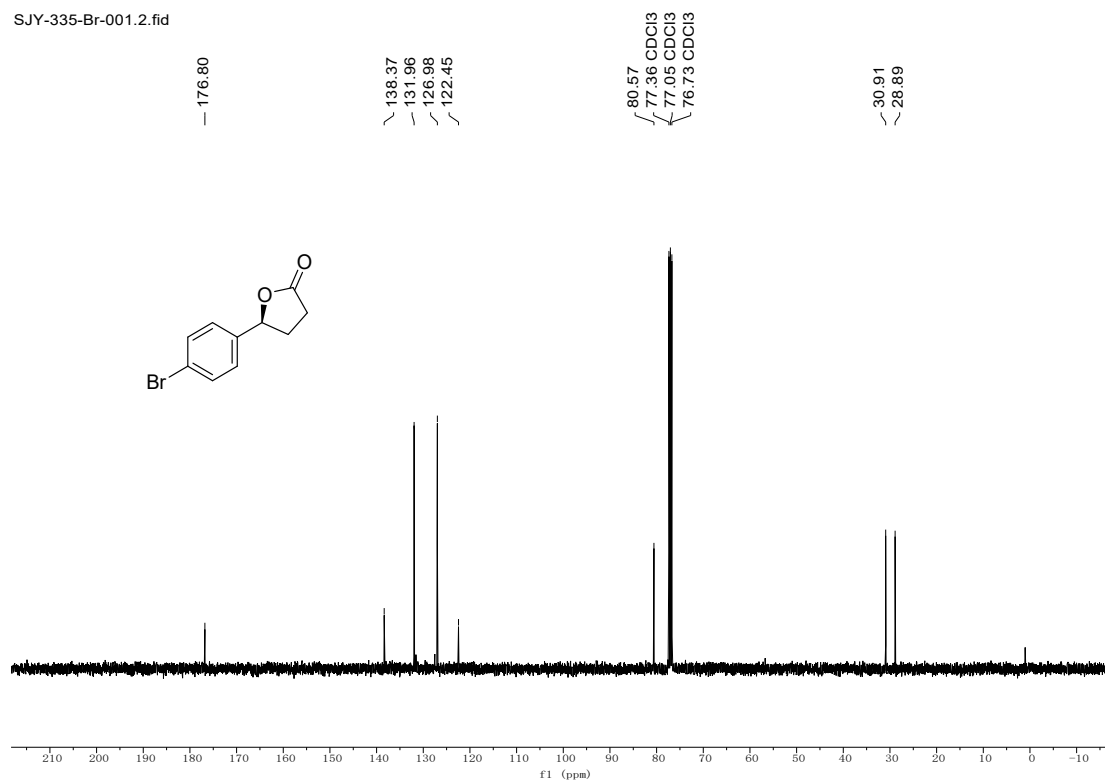

<sup>1</sup>H NMR (600 MHz, CDCl<sub>3</sub>) of compound **3b**

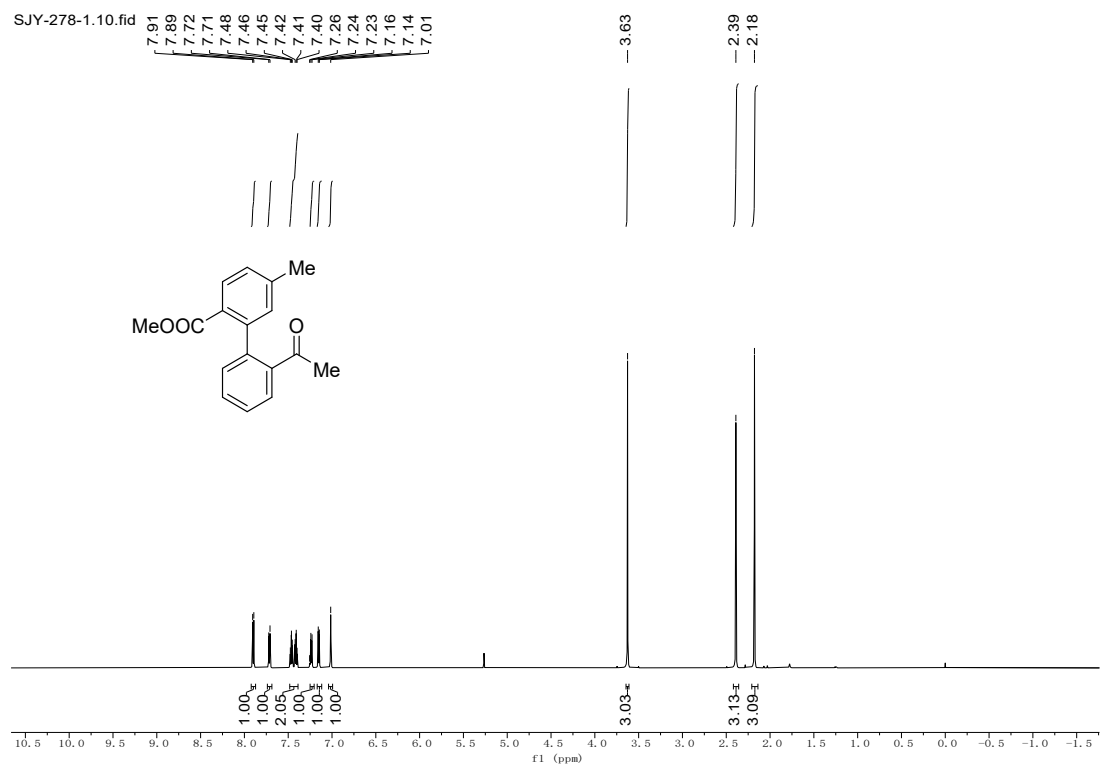

<sup>13</sup>C NMR (151 MHz, CDCl<sub>3</sub>) of compound **3b**

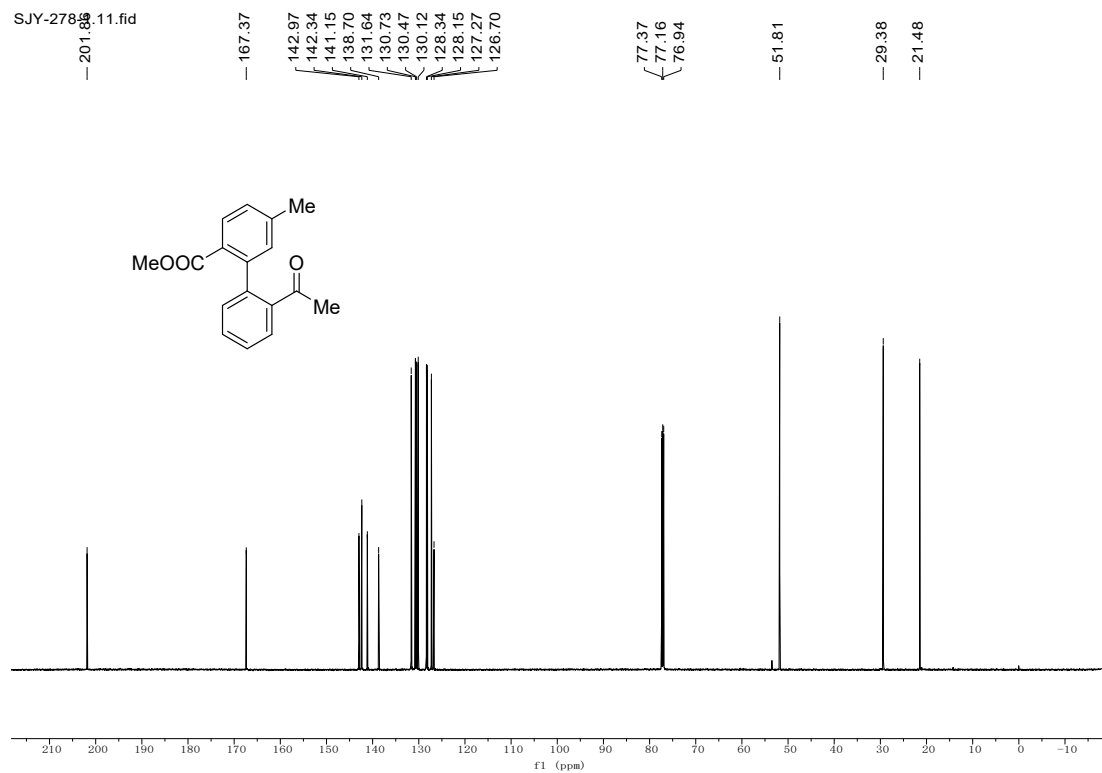



<sup>1</sup>H NMR (600 MHz, CDCl<sub>3</sub>) of compound **3i**

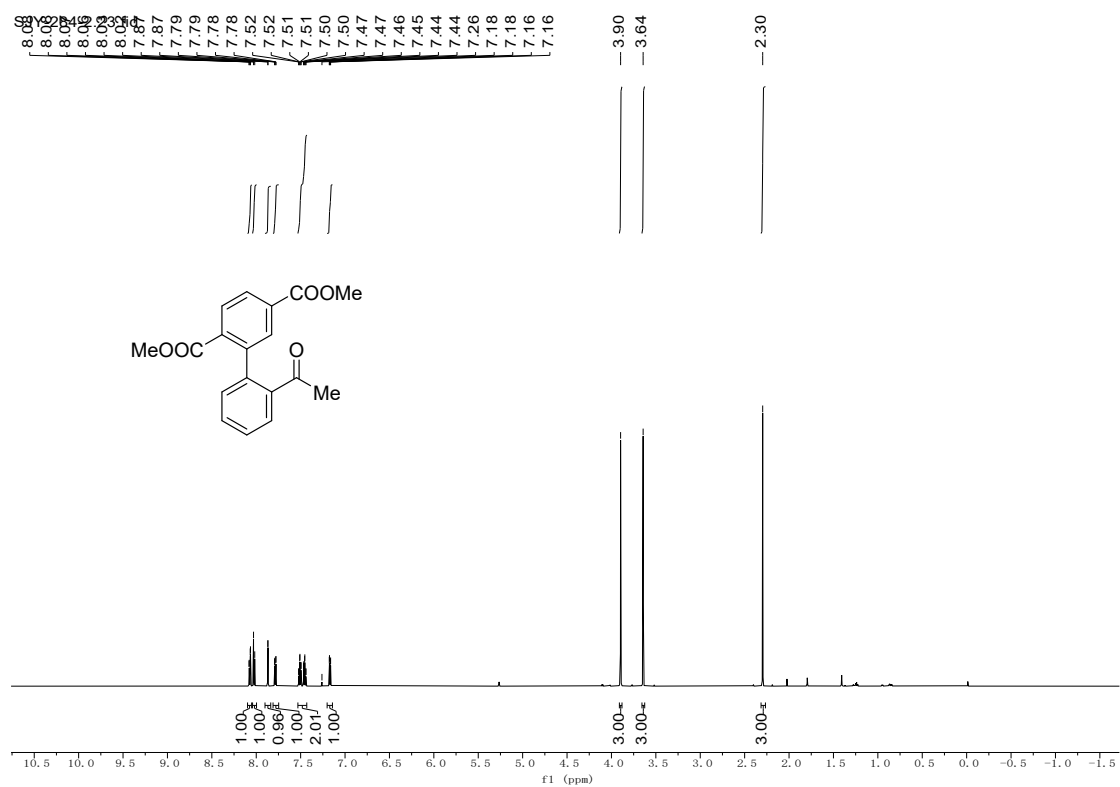

<sup>13</sup>C NMR (151 MHz, CDCl<sub>3</sub>) of compound **3i**



<sup>13</sup>C NMR (151 MHz, CDCl<sub>3</sub>) of compound **3o**

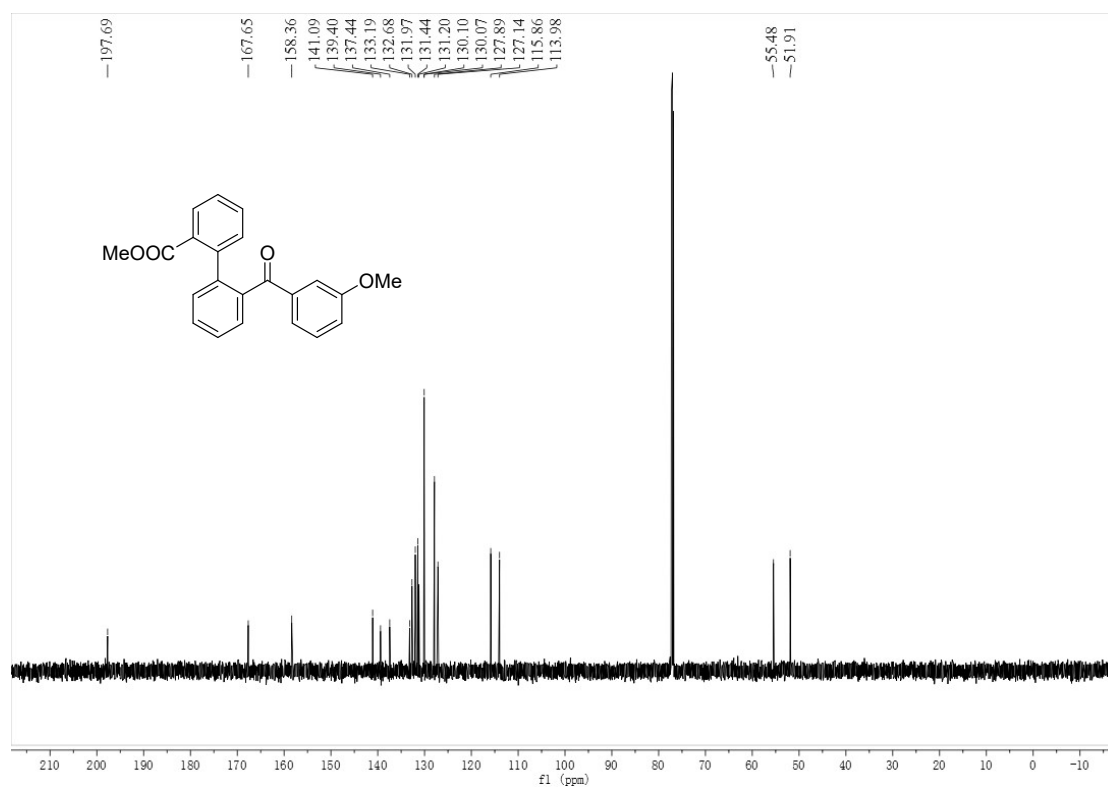

<sup>1</sup>H NMR (400 MHz, CDCl<sub>3</sub>) of compound **3p**

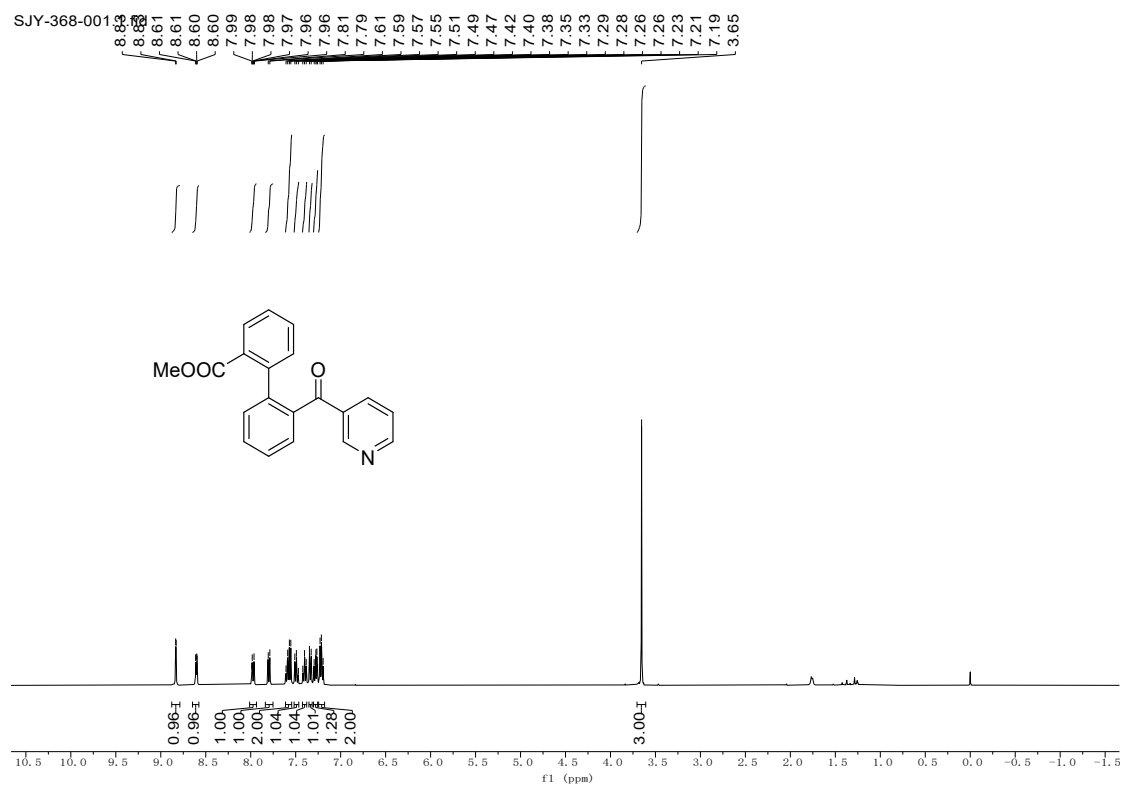

<sup>13</sup>C NMR (101 MHz, CDCl<sub>3</sub>) of compound **3p**

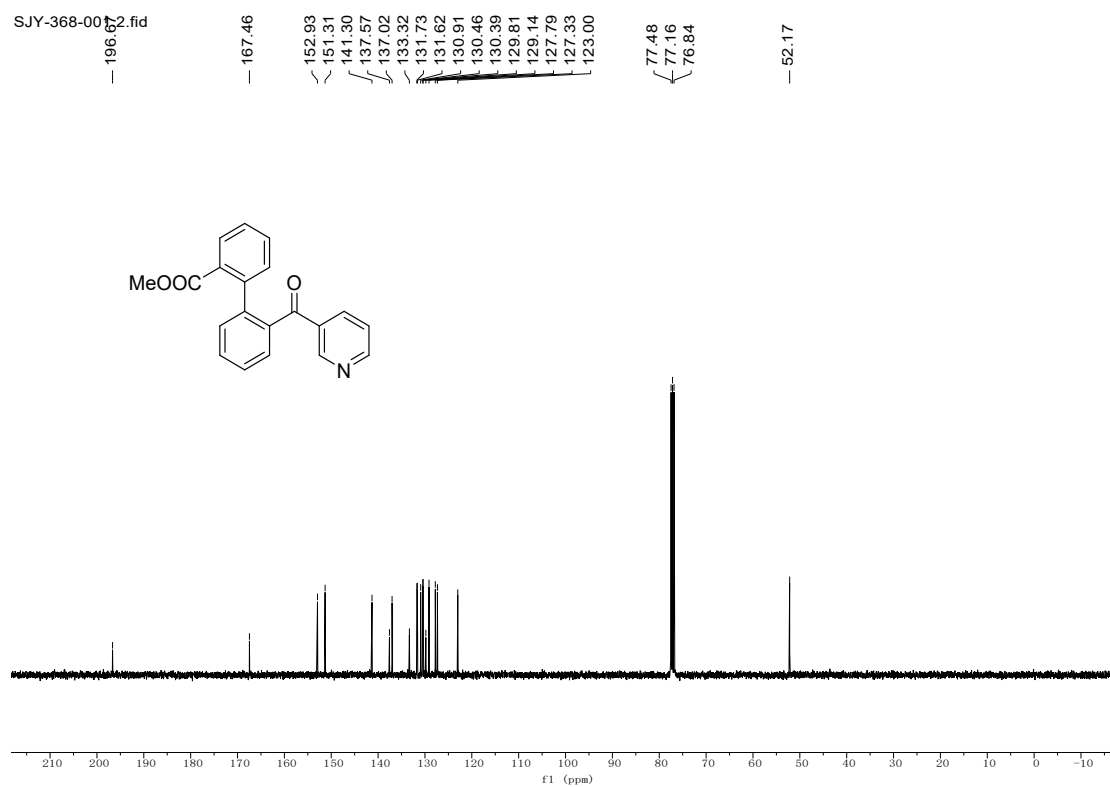

<sup>1</sup>H NMR (400 MHz, CDCl<sub>3</sub>) of compound **3q**

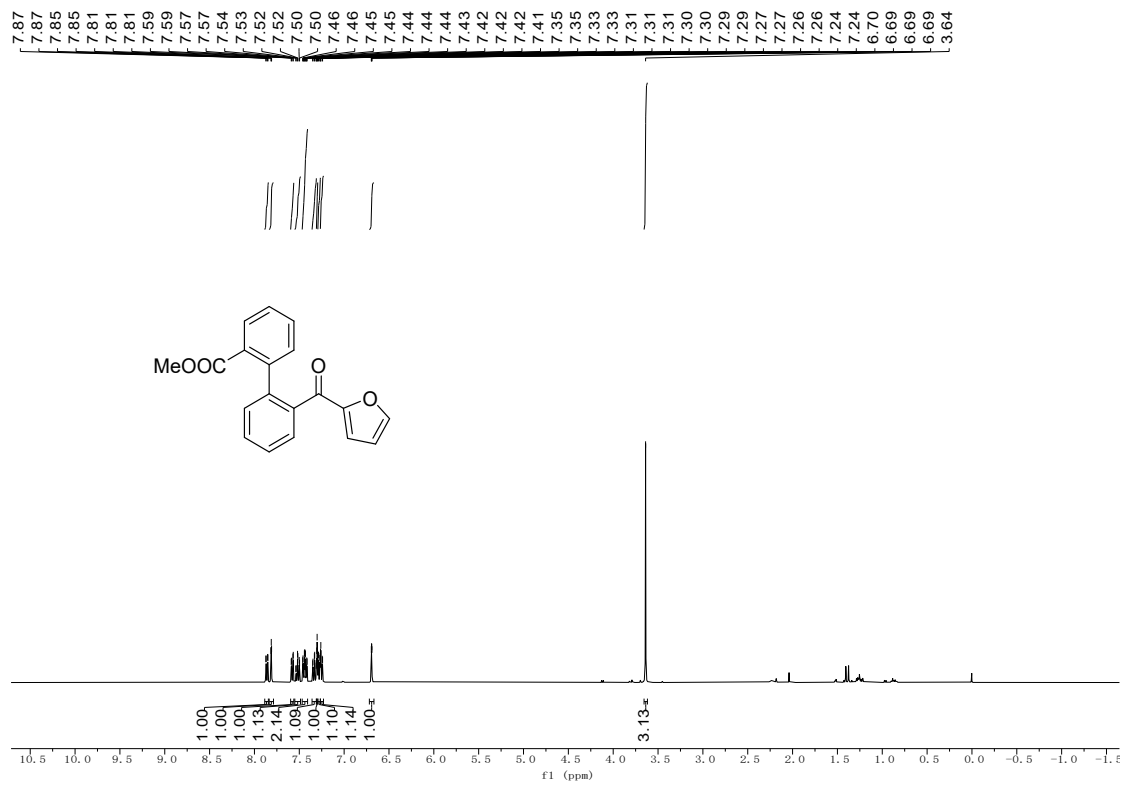

<sup>13</sup>C NMR (101 MHz, CDCl<sub>3</sub>) of compound **3q**

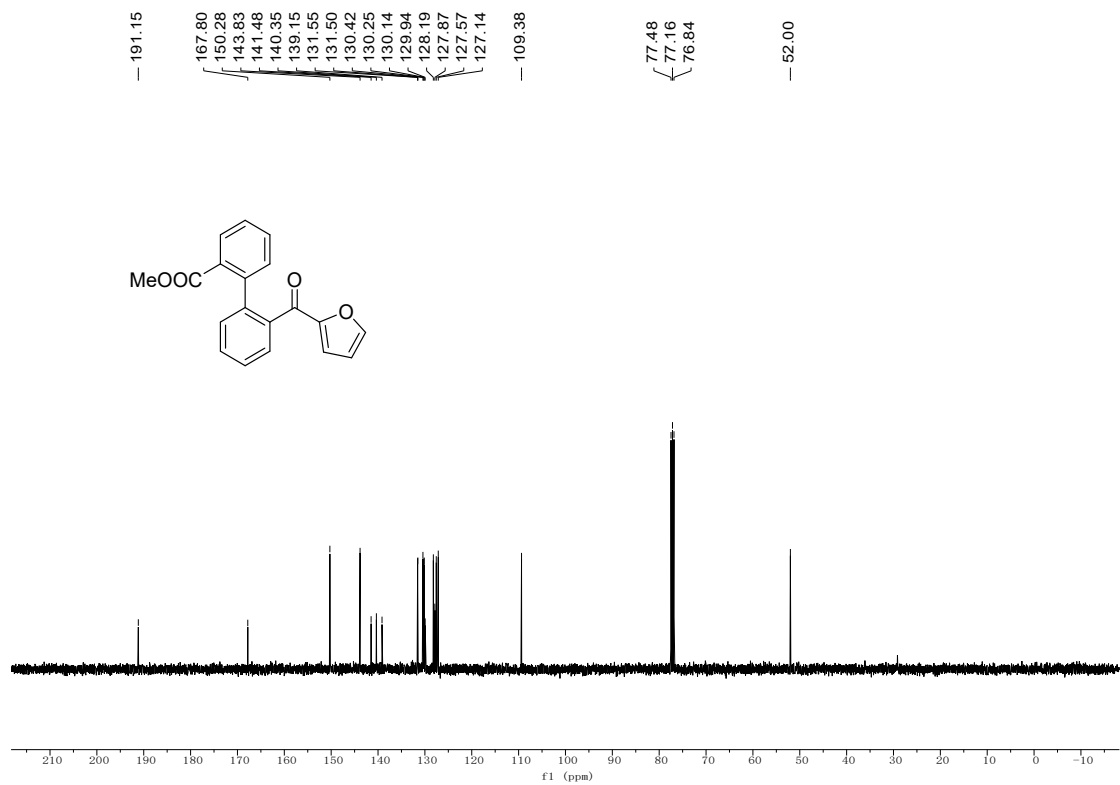

$^1\text{H}$  NMR (600 MHz,  $\text{CDCl}_3$ ) of compound **4a**

SJY-229-1.10.fid

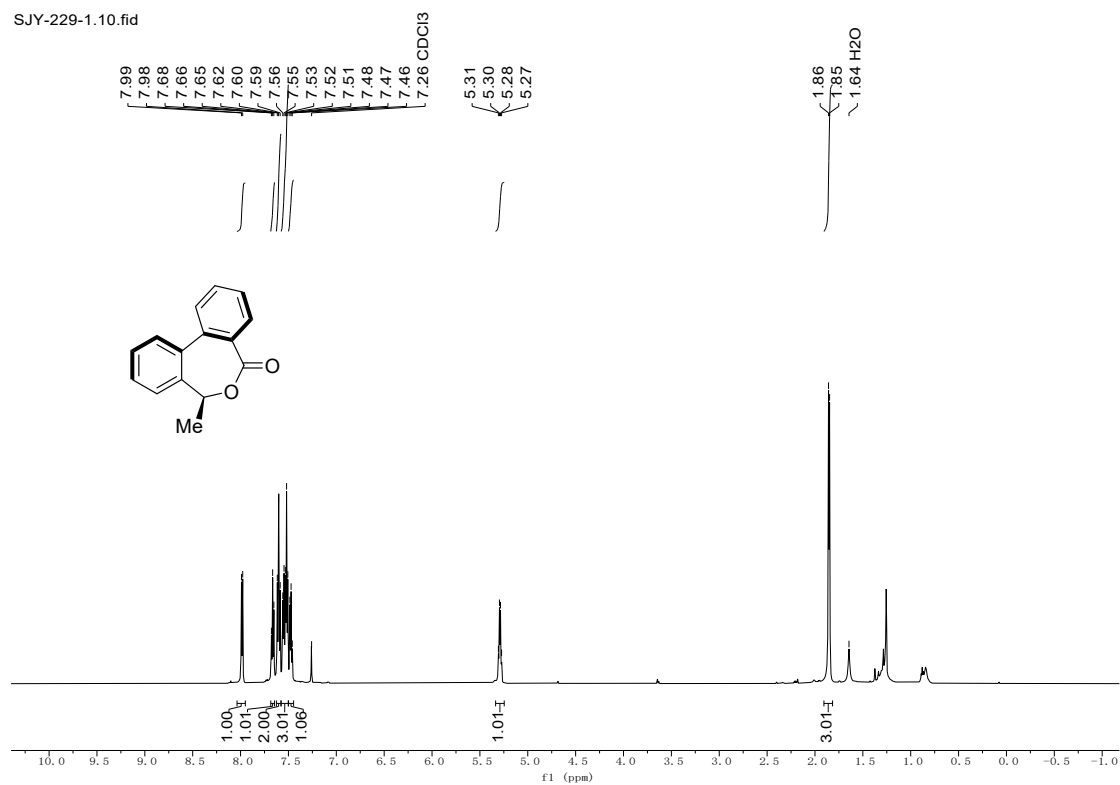

$^{13}\text{C}$  NMR (151 MHz,  $\text{CDCl}_3$ ) of compound **4a**

SJY-229-1.11.fid

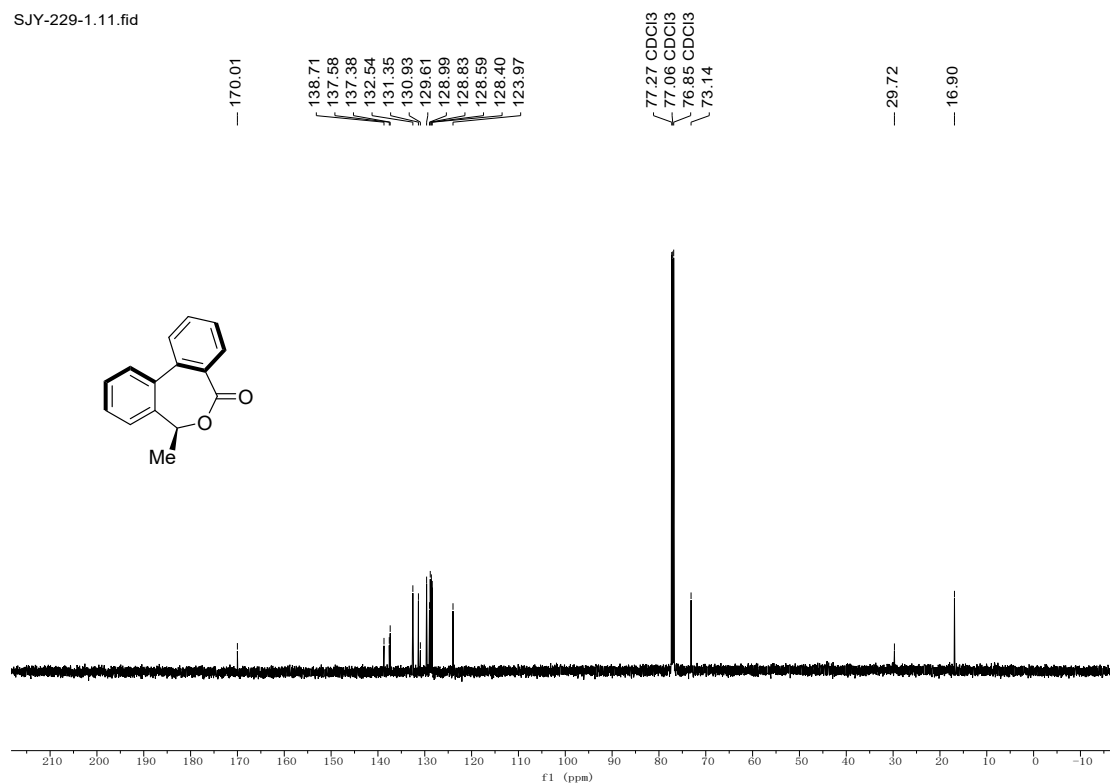

### <sup>1</sup>H NMR (400 MHz, CDCl<sub>3</sub>) of compound 4b

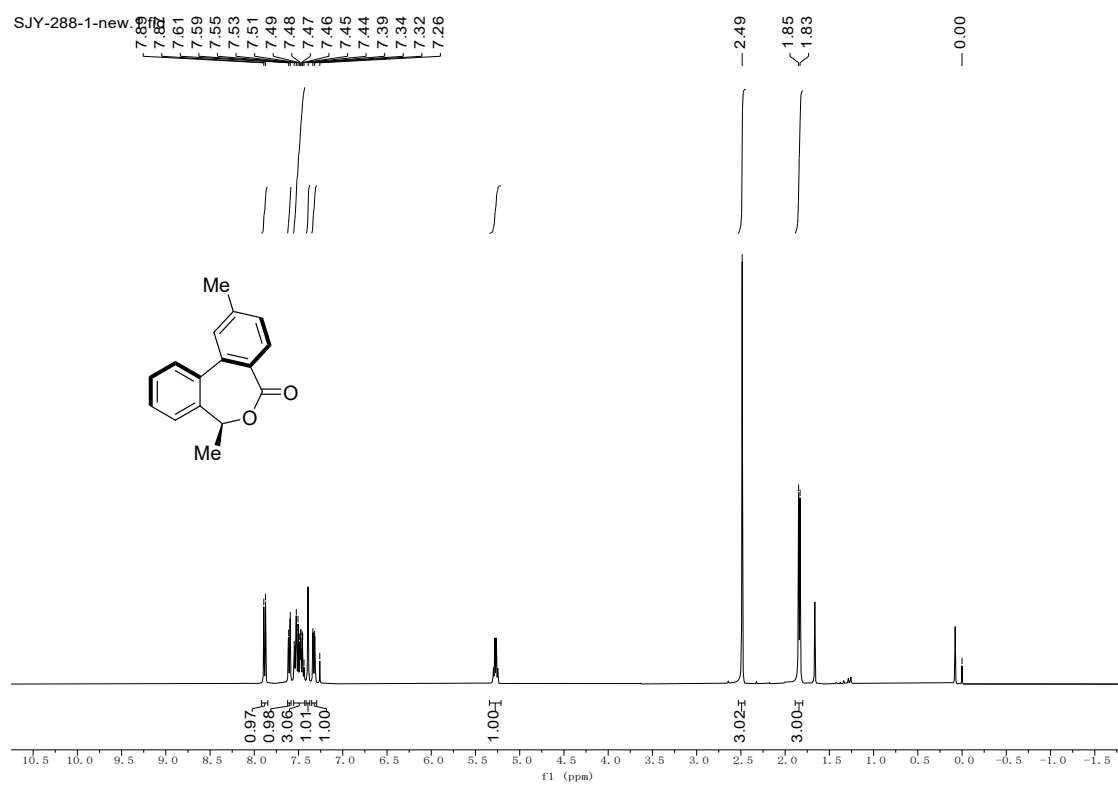

$^{13}\text{C}$  NMR (101 MHz,  $\text{CDCl}_3$ ) of compound **4b**

SJY-288-1-new.2.fid

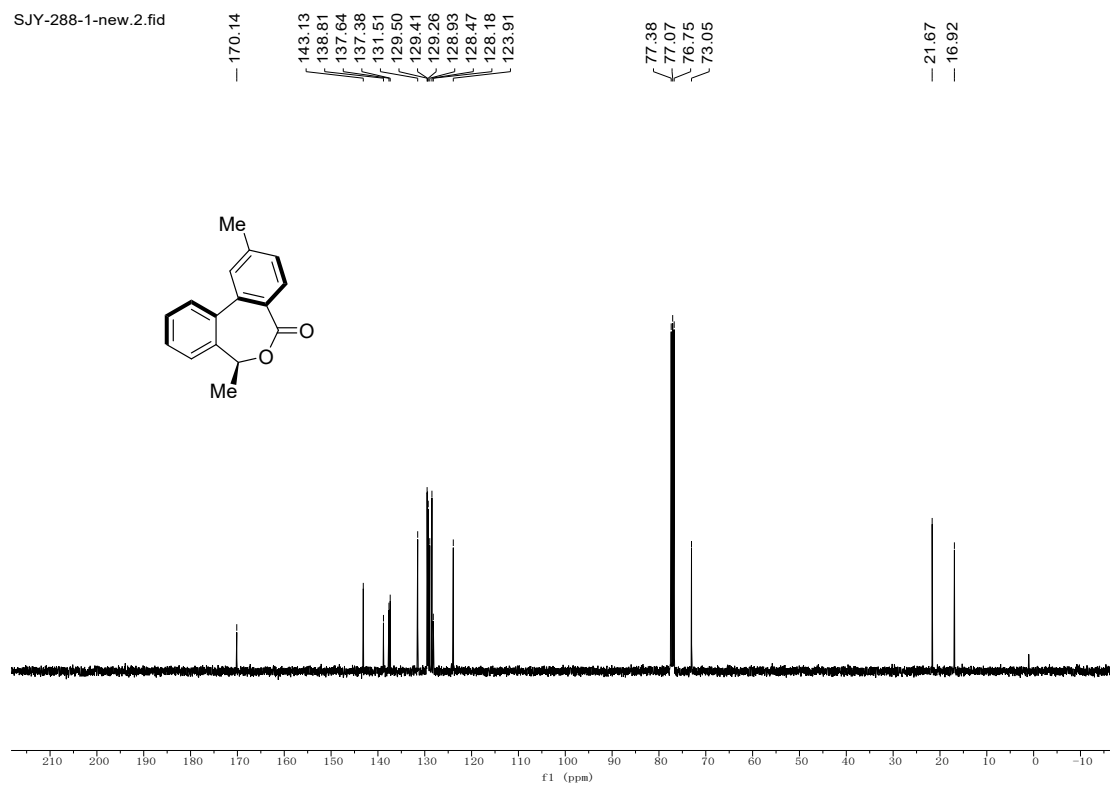

$^1\text{H}$  NMR (400 MHz,  $\text{CDCl}_3$ ) of compound **4c**



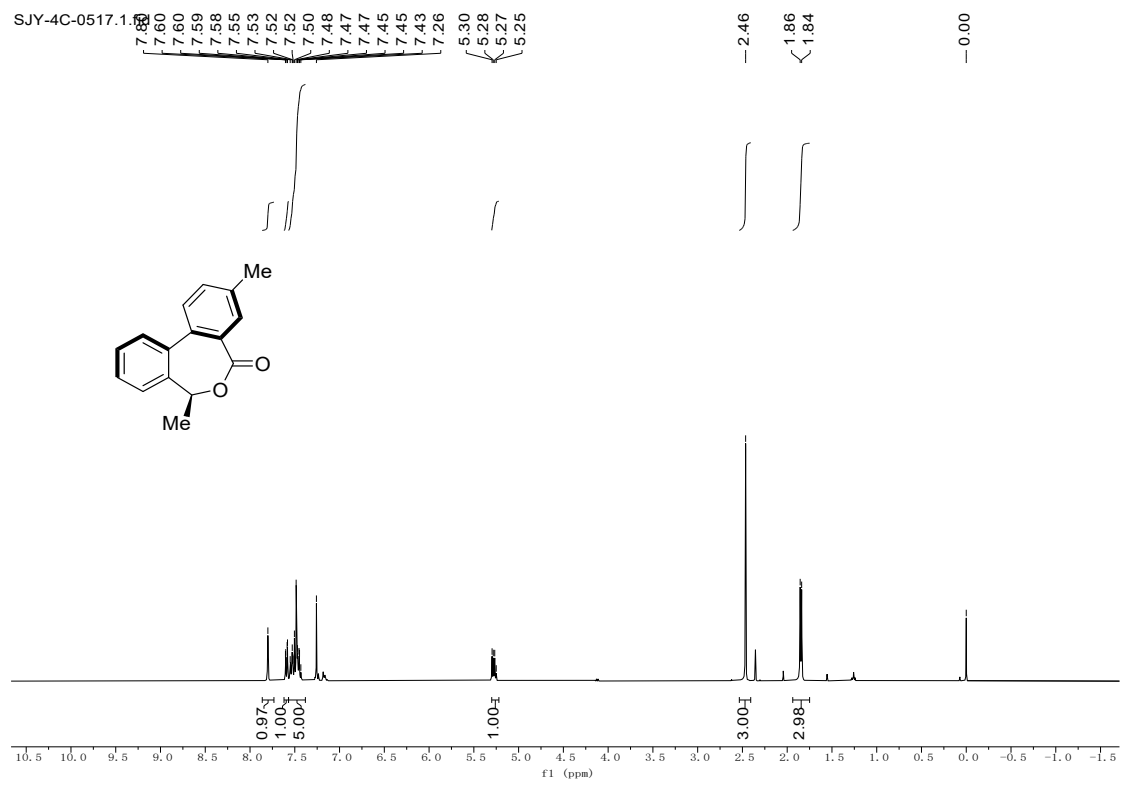

<sup>13</sup>C NMR (101 MHz, CDCl<sub>3</sub>) of compound 4c

SJY-4C-01.2.fid

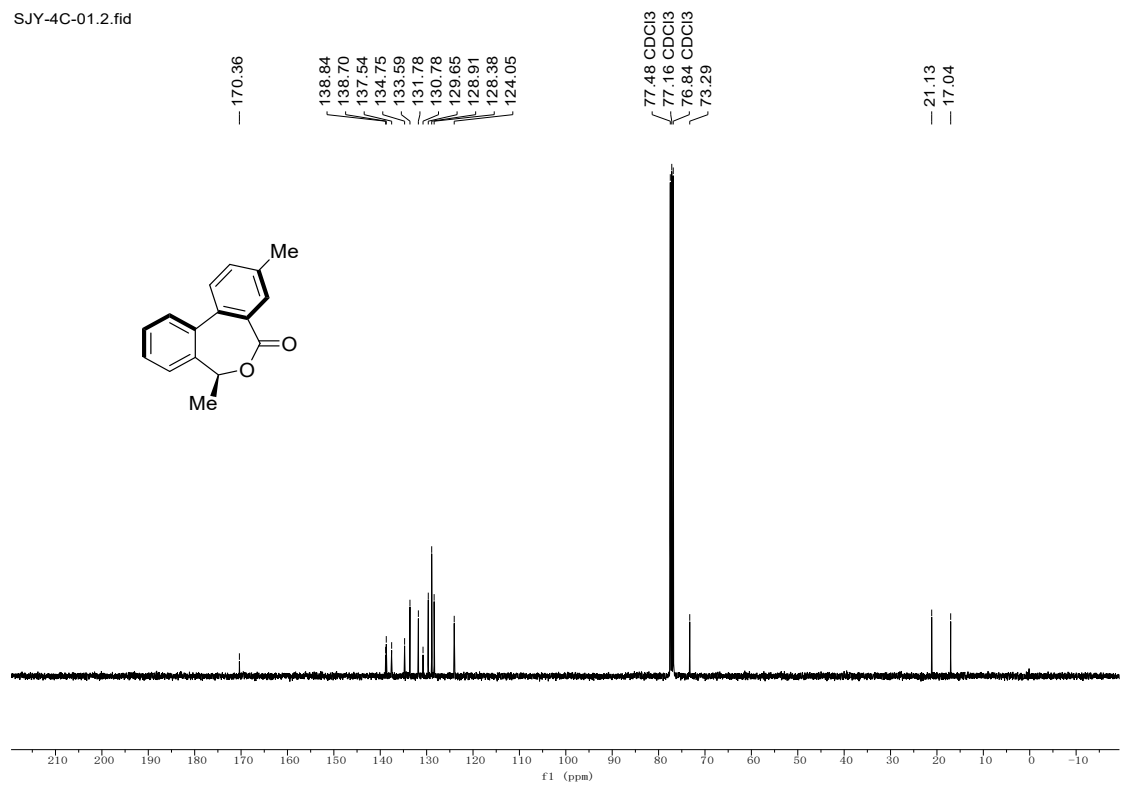

<sup>1</sup>H NMR (600 MHz, CDCl<sub>3</sub>) of compound **4d**

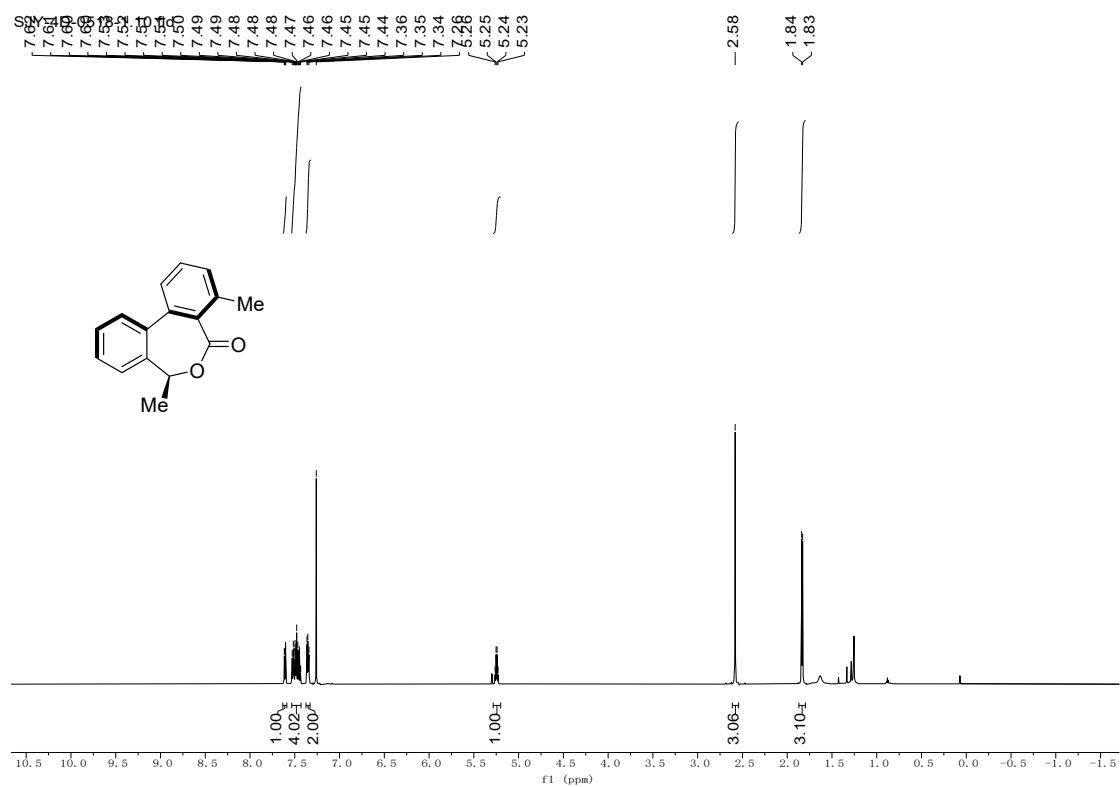

<sup>13</sup>C NMR (151 MHz, CDCl<sub>3</sub>) of compound **4d**

SJY-4d-03.23.fid

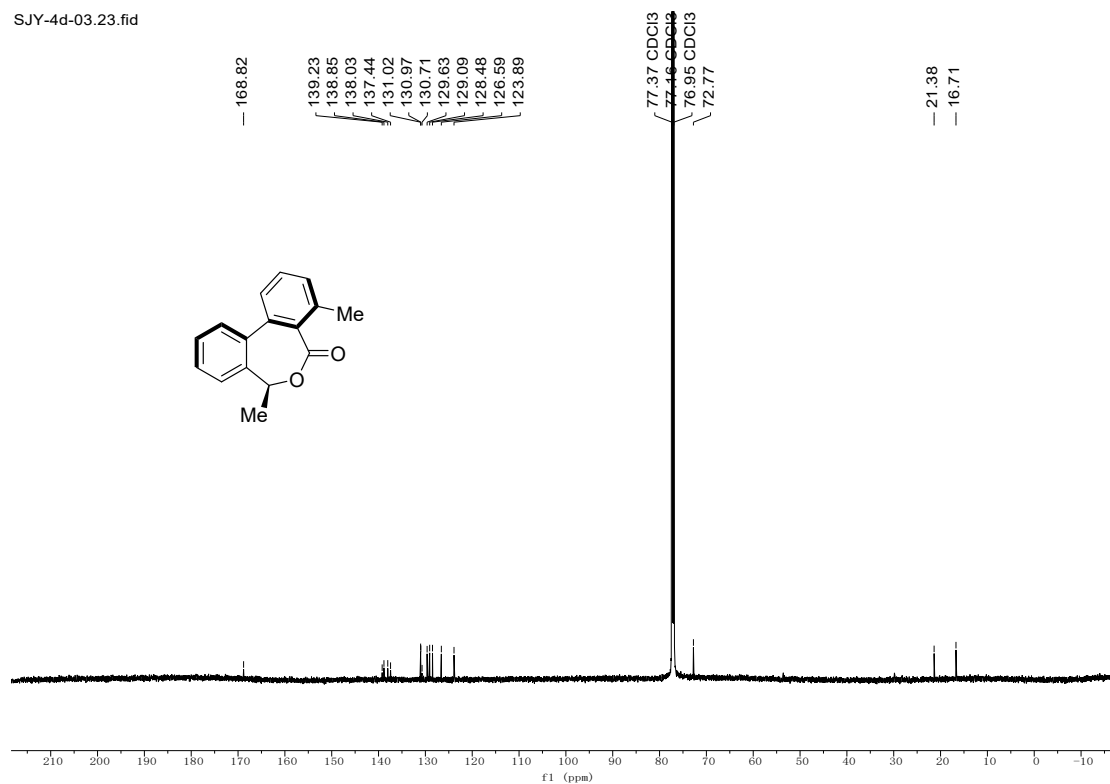

### <sup>1</sup>H NMR (600 MHz, CDCl<sub>3</sub>) of compound 4e

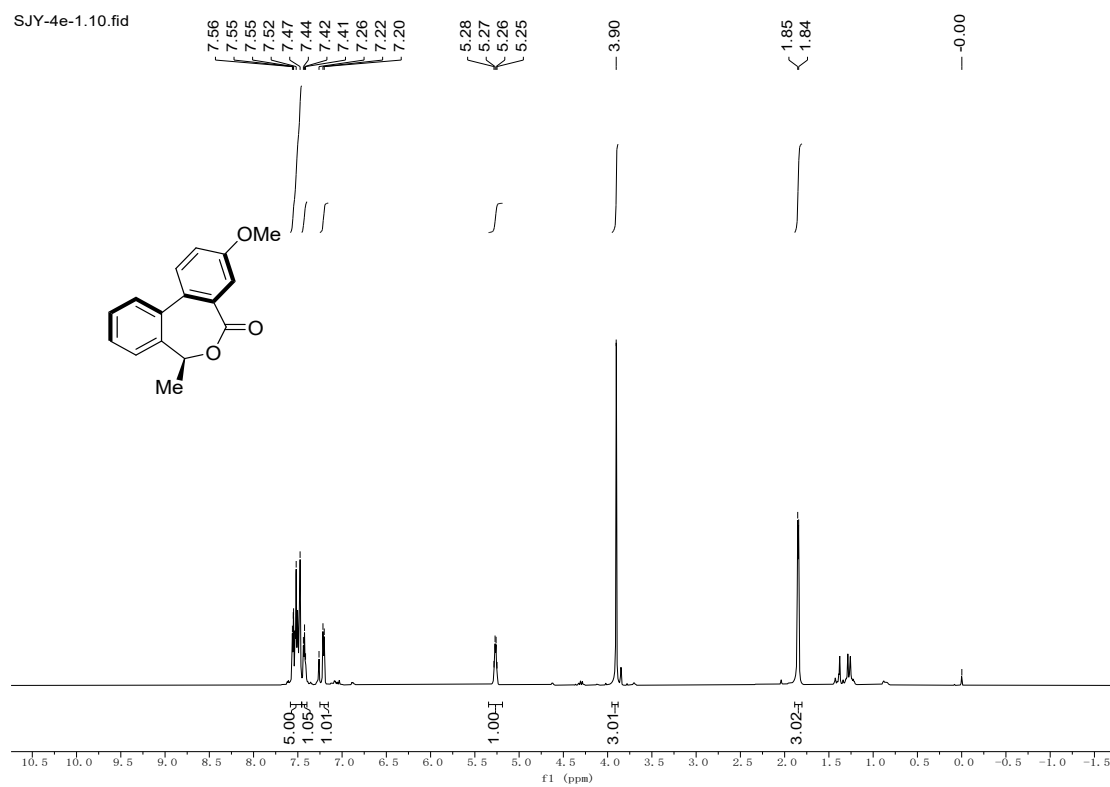

$^{13}\text{C}$  NMR (151 MHz,  $\text{CDCl}_3$ ) of compound **4e**

SJY-4e-1.11.fid

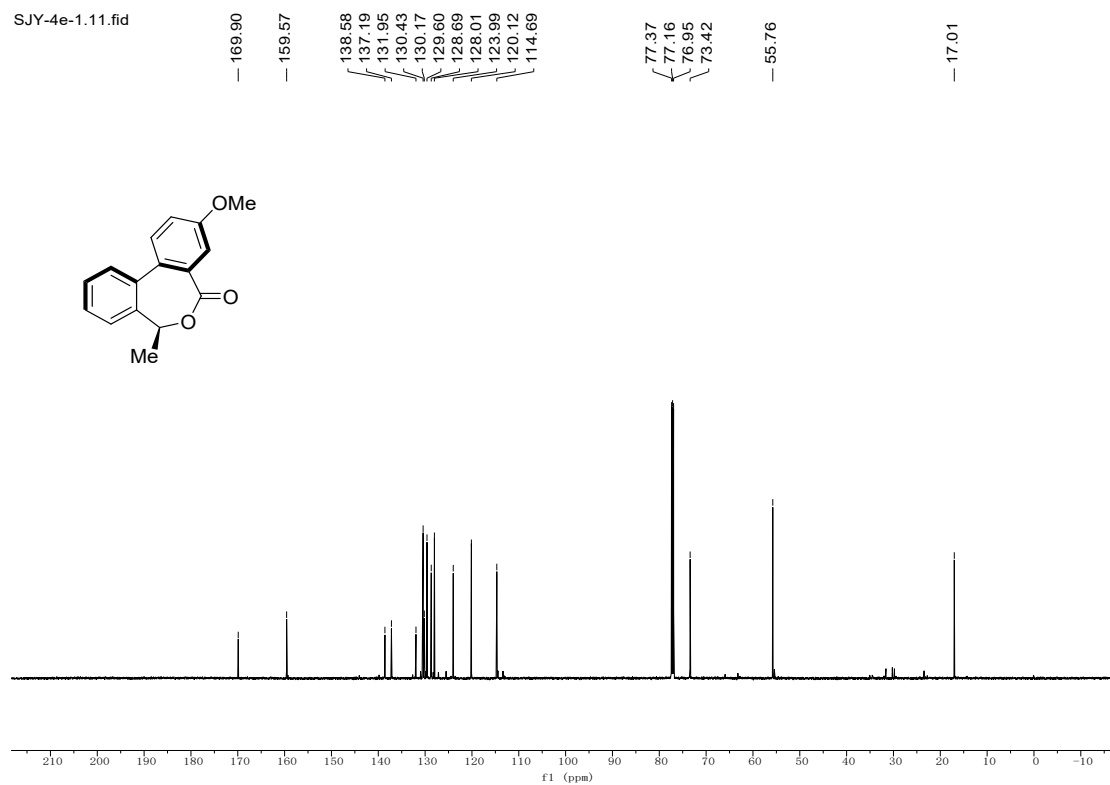

$^1\text{H}$  NMR (400 MHz,  $\text{CDCl}_3$ ) of compound **4f**

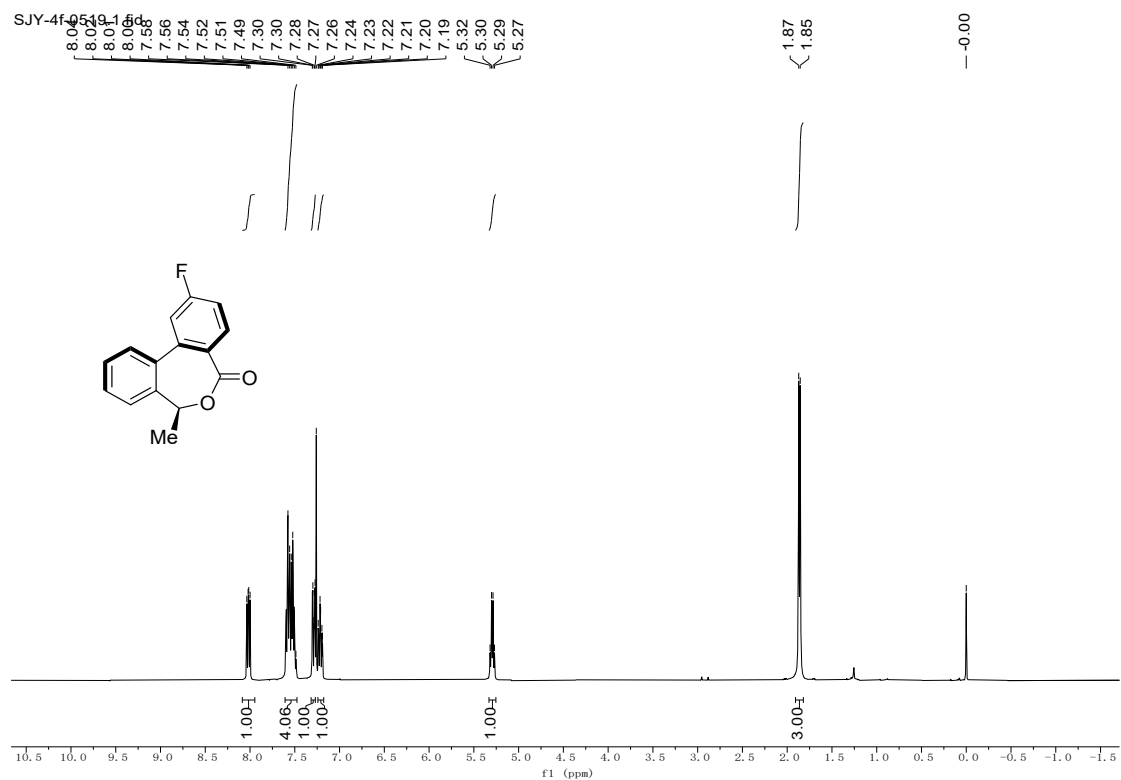

<sup>13</sup>C NMR (101 MHz, CDCl<sub>3</sub>) of compound 4f

SJY-4f-01.11.fid

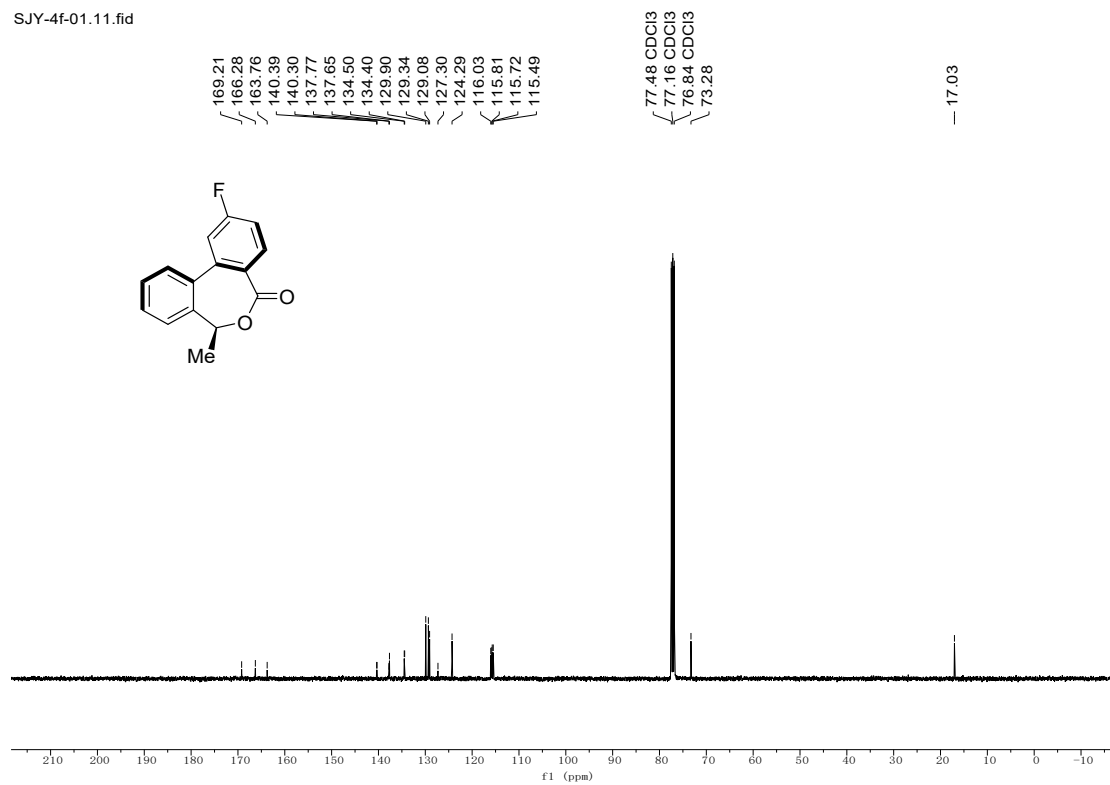

<sup>1</sup>H NMR (600 MHz, CDCl<sub>3</sub>) of compound **4g**

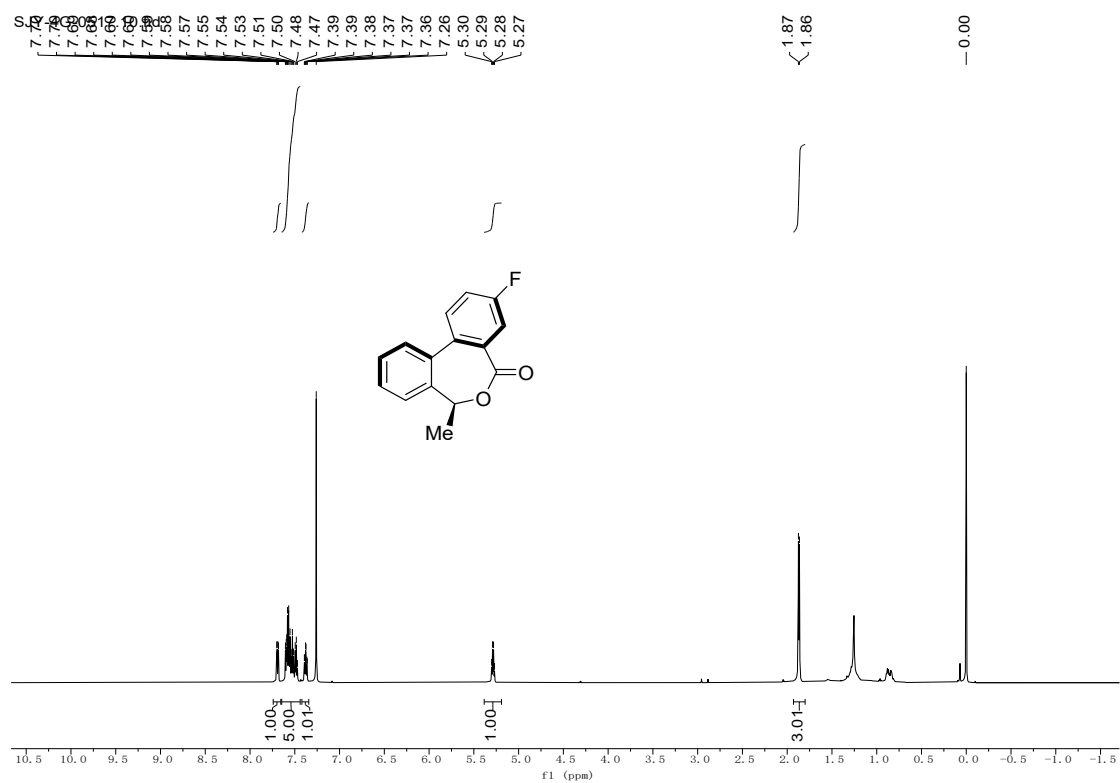

<sup>13</sup>C NMR (151 MHz, CDCl<sub>3</sub>) of compound **4g**

SJY-4g-03.21.fid

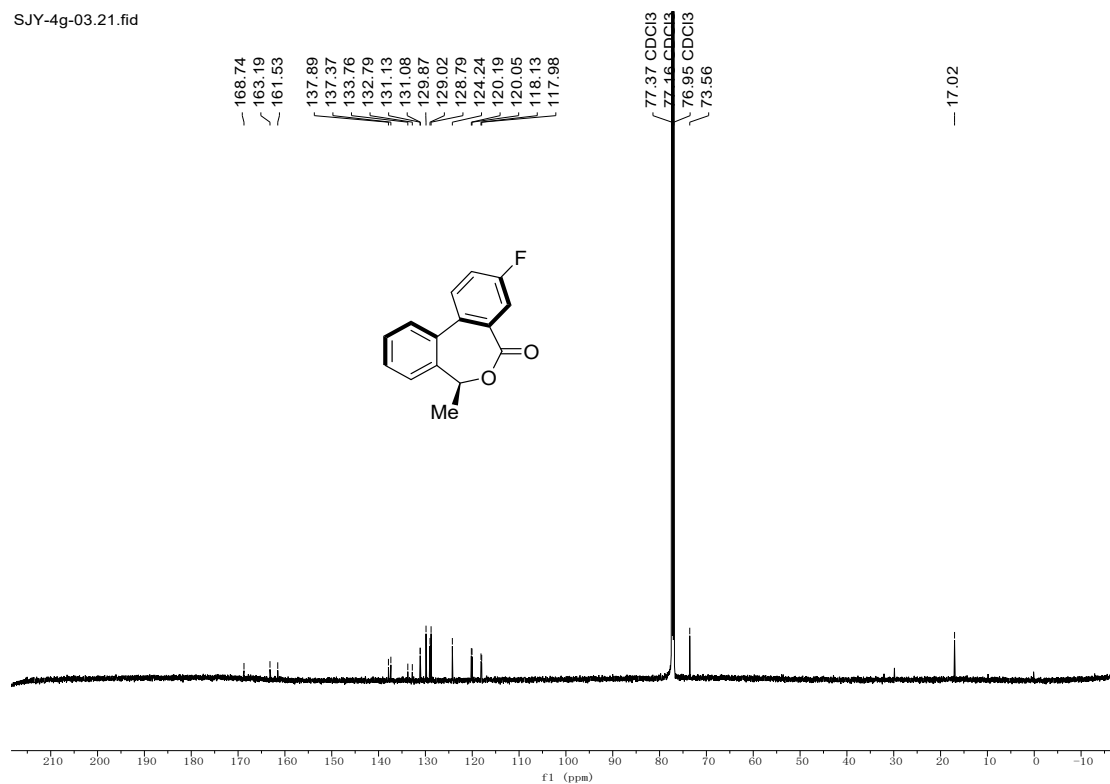

### <sup>1</sup>H NMR (400 MHz, CDCl<sub>3</sub>) of compound 4h

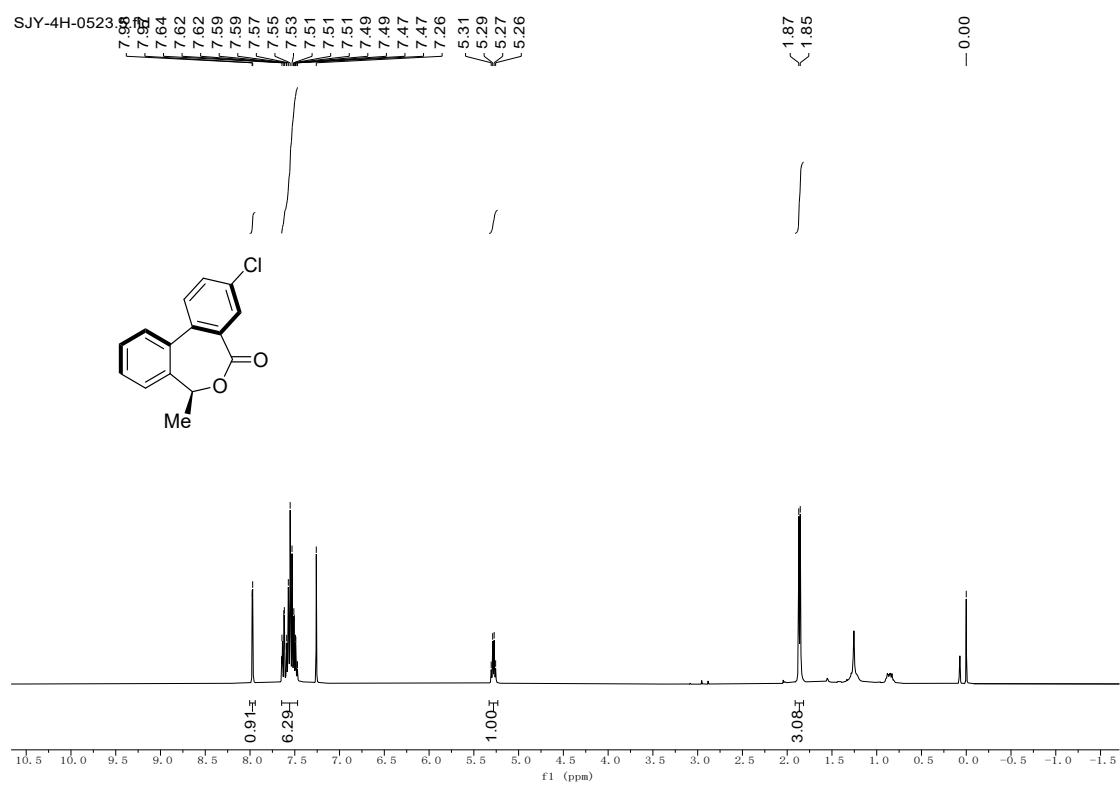

$^{13}\text{C}$  NMR (101 MHz,  $\text{CDCl}_3$ ) of compound **4h**

SJY-4h-01.2.fid

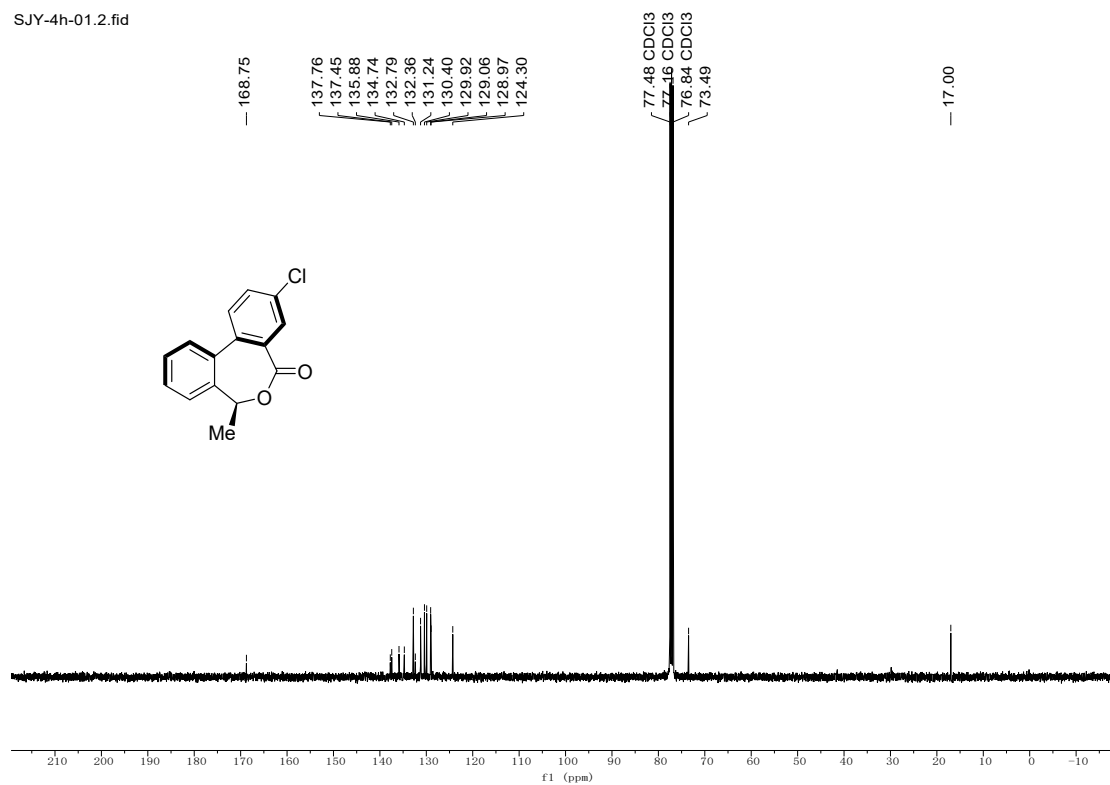

$^1\text{H}$  NMR (400 MHz,  $\text{CDCl}_3$ ) of compound **4i**



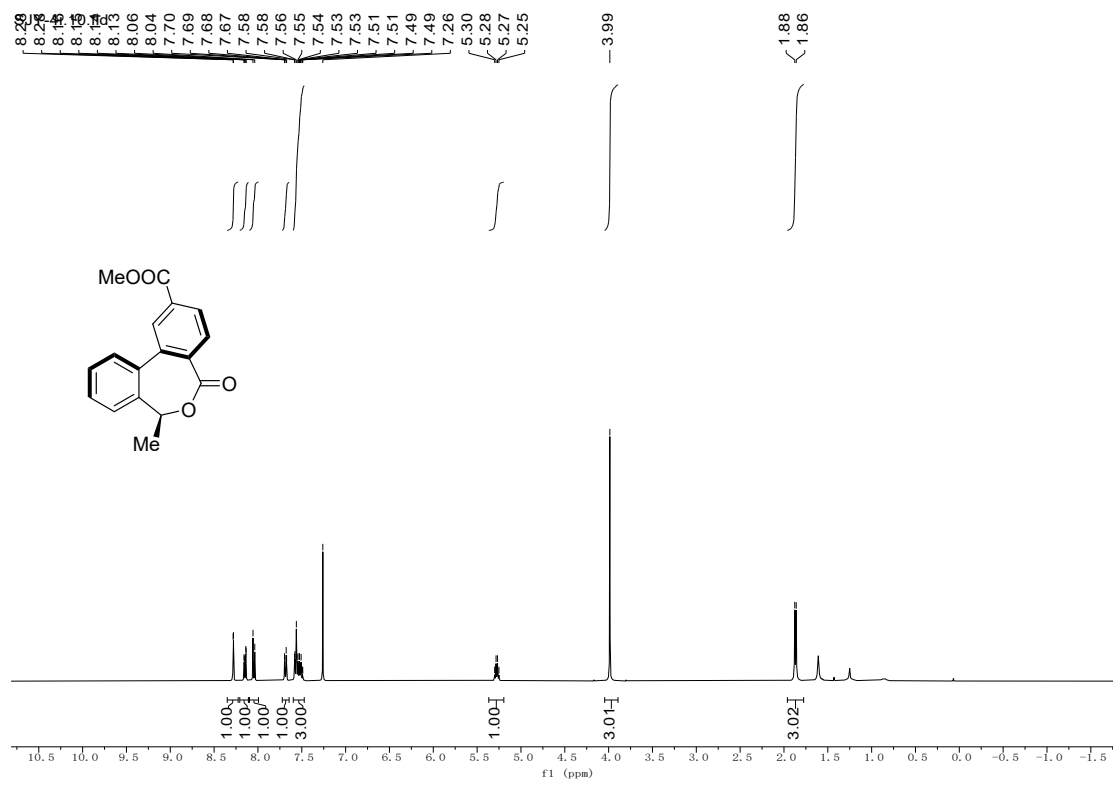

<sup>13</sup>C NMR (101 MHz, CDCl<sub>3</sub>) of compound 4i

SJY-4i.11.fid

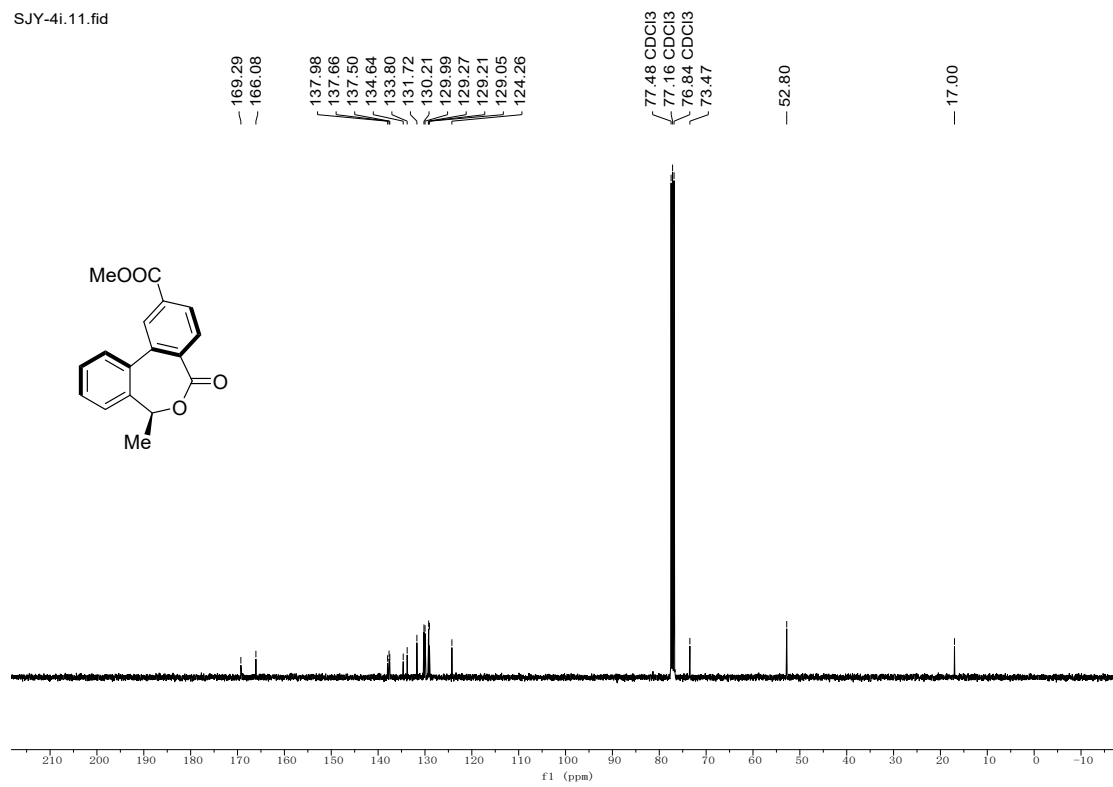

<sup>1</sup>H NMR (400 MHz, CDCl<sub>3</sub>) of compound **4j**

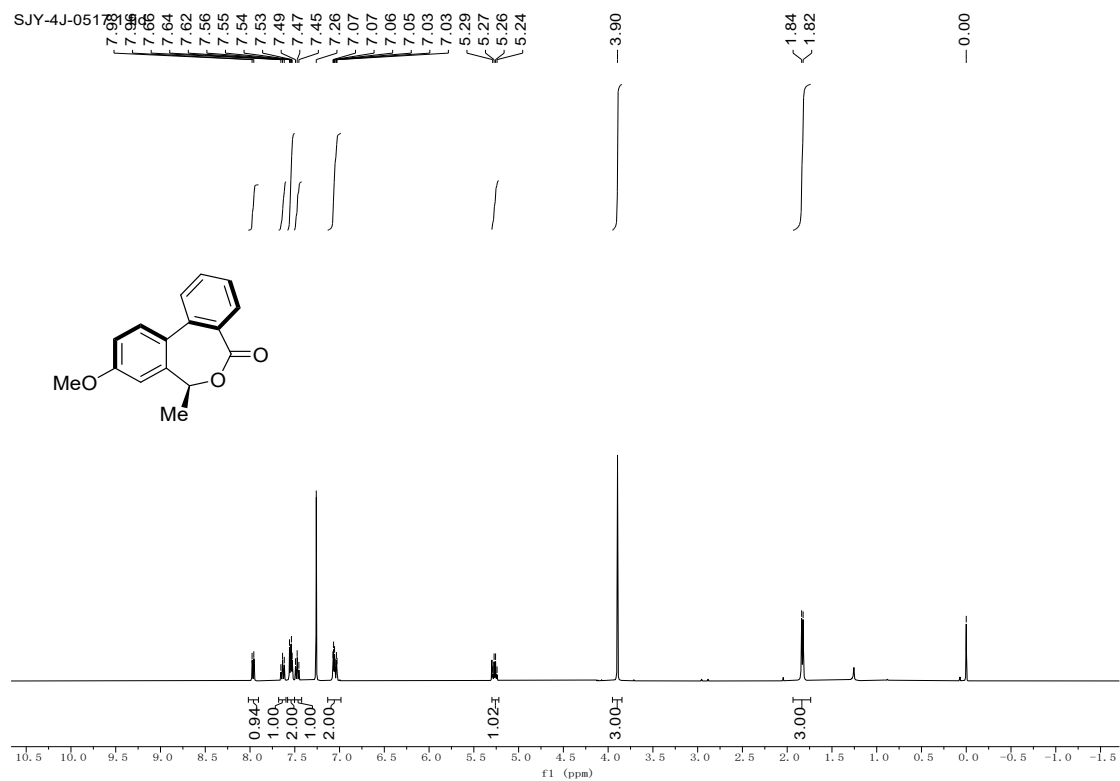

<sup>13</sup>C NMR (101 MHz, CDCl<sub>3</sub>) of compound **4j**

SJY-4j-01.11.fid

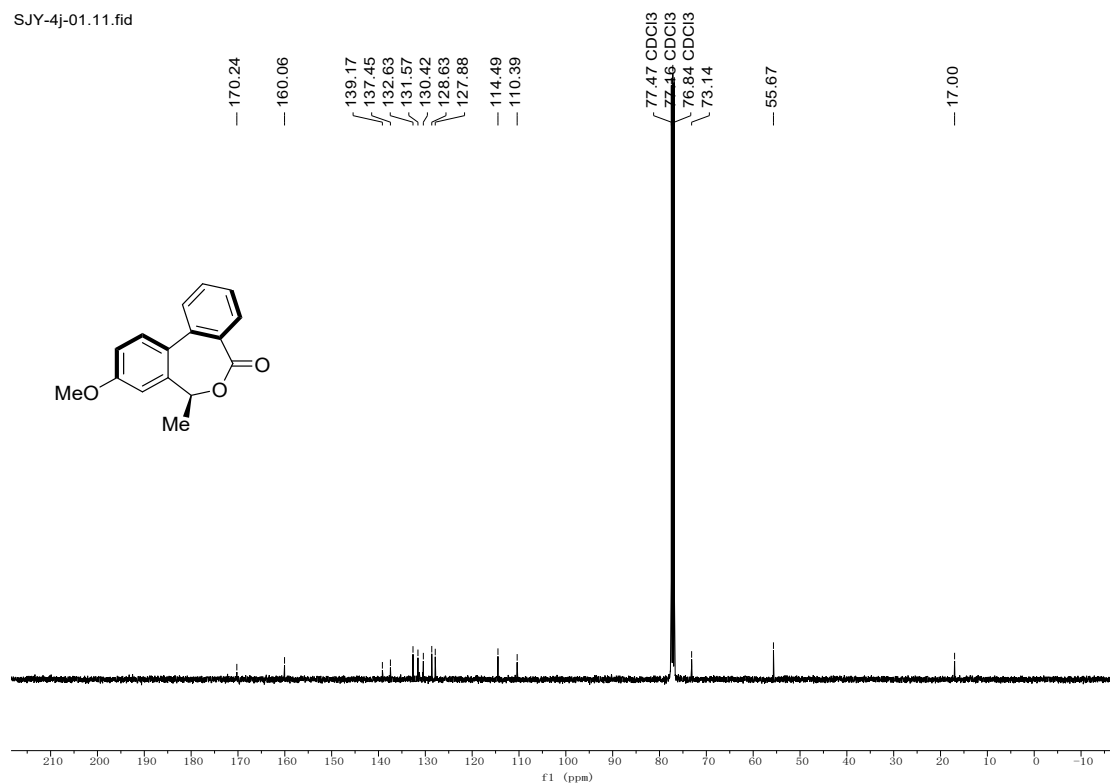

### <sup>1</sup>H NMR (400 MHz, CDCl<sub>3</sub>) of compound 4k

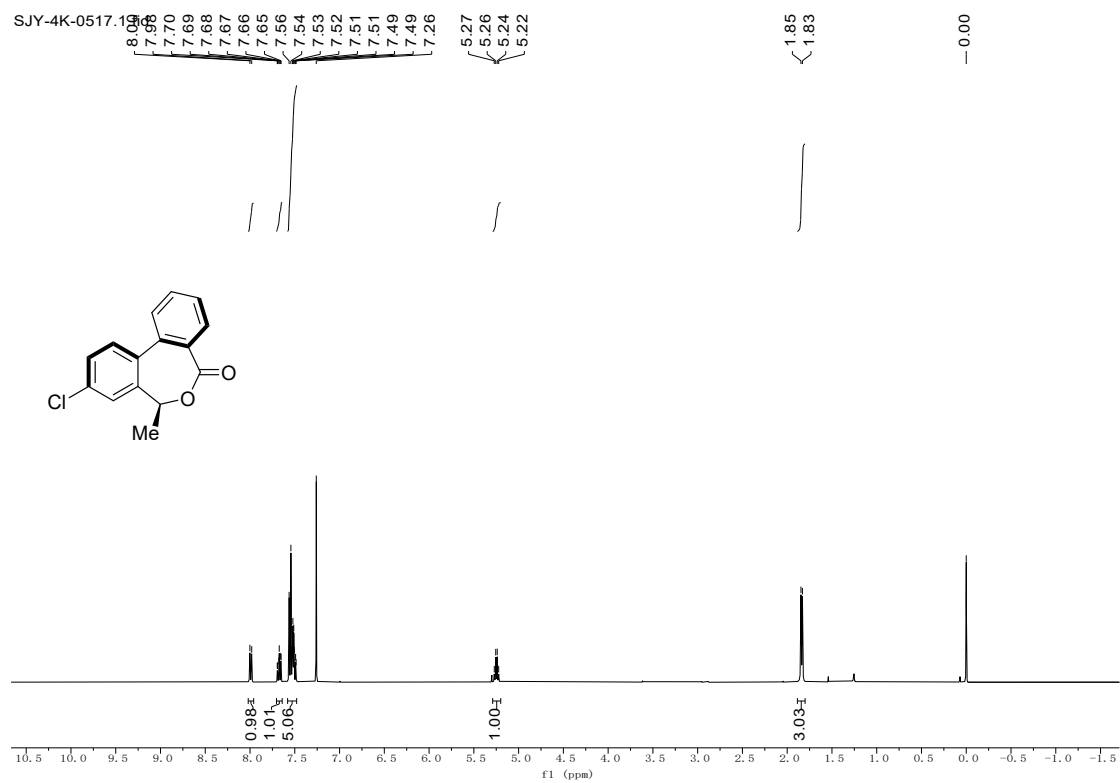

<sup>13</sup>C NMR (101 MHz, CDCl<sub>3</sub>) of compound **4k**

SJY-4k.2.fid

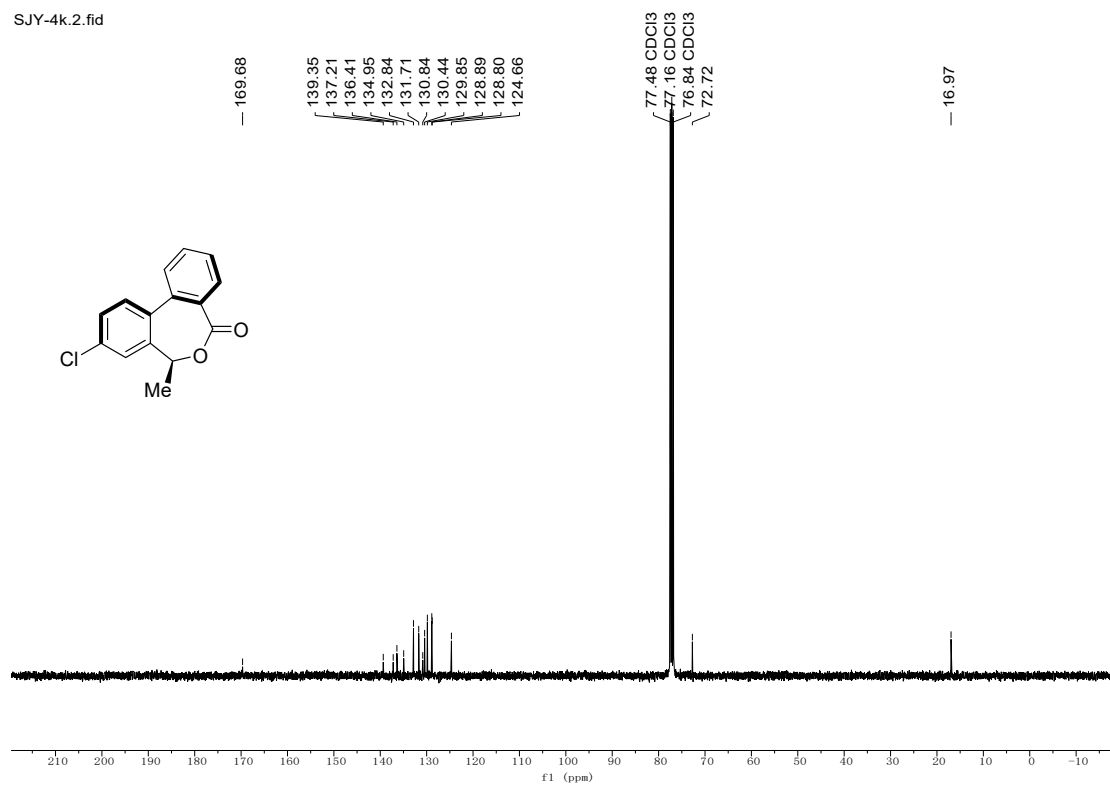

<sup>1</sup>H NMR (400 MHz, CDCl<sub>3</sub>) of compound **4l**

SJY-4I.12.fid

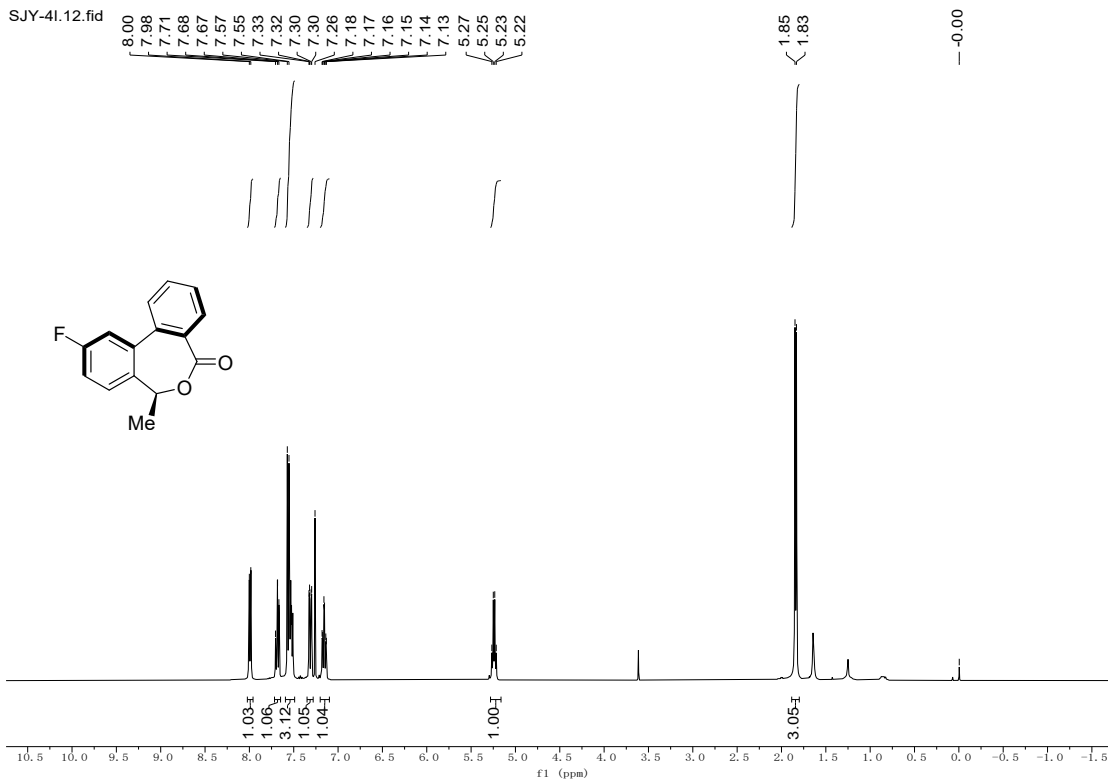

### $^{13}\text{C}$ NMR (101 MHz, $\text{CDCl}_3$ ) of compound 4I

SJY-4I.13.fid

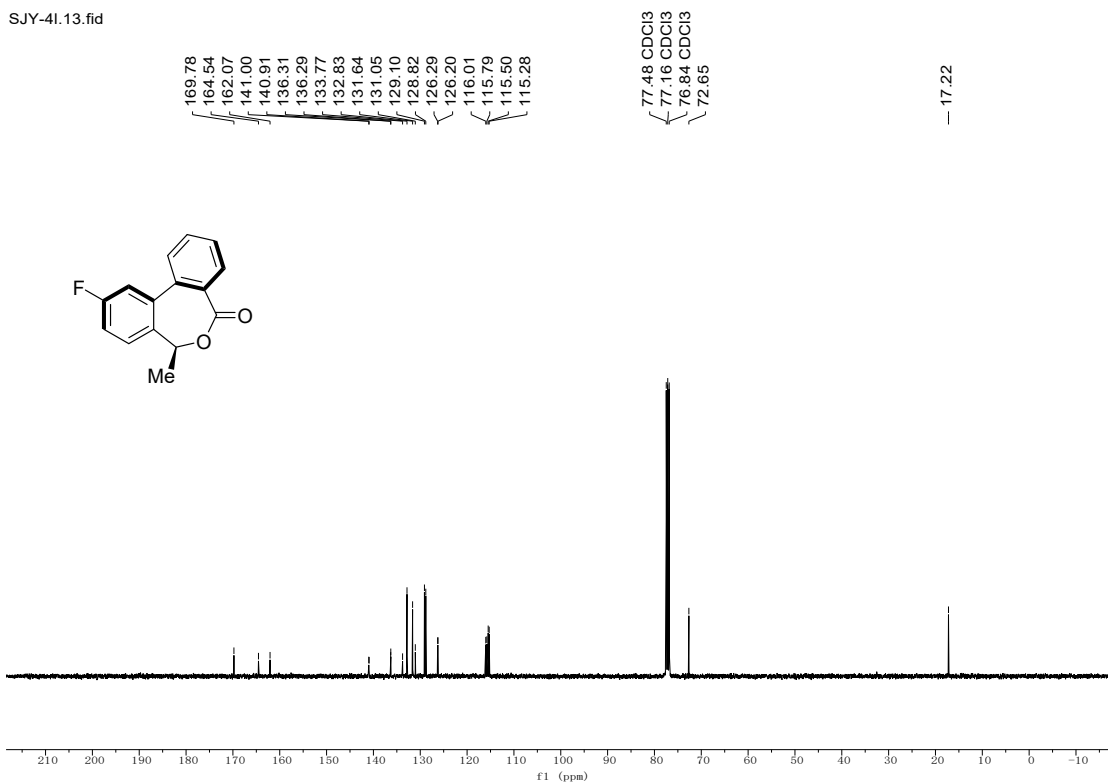

$^1\text{H}$  NMR (400 MHz,  $\text{CDCl}_3$ ) of compound **4m**

SJY-4m.14.fid

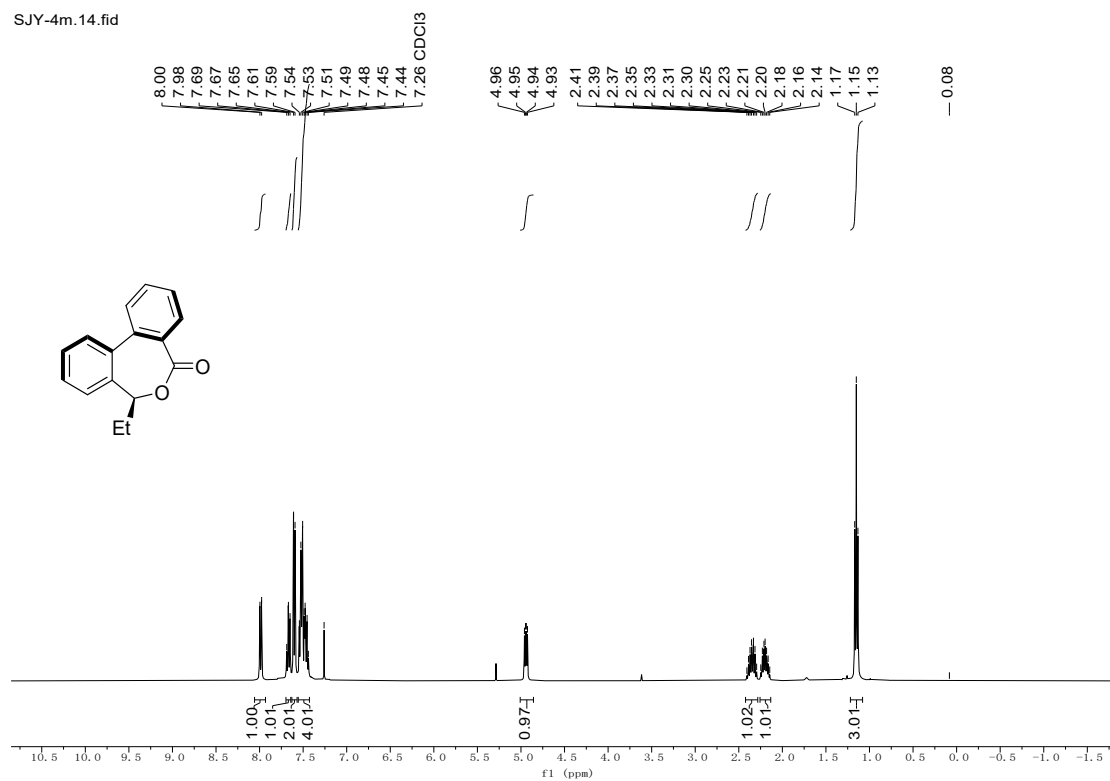

$^{13}\text{C}$  NMR (101 MHz,  $\text{CDCl}_3$ ) of compound **4m**

SJY-4m.15.fid

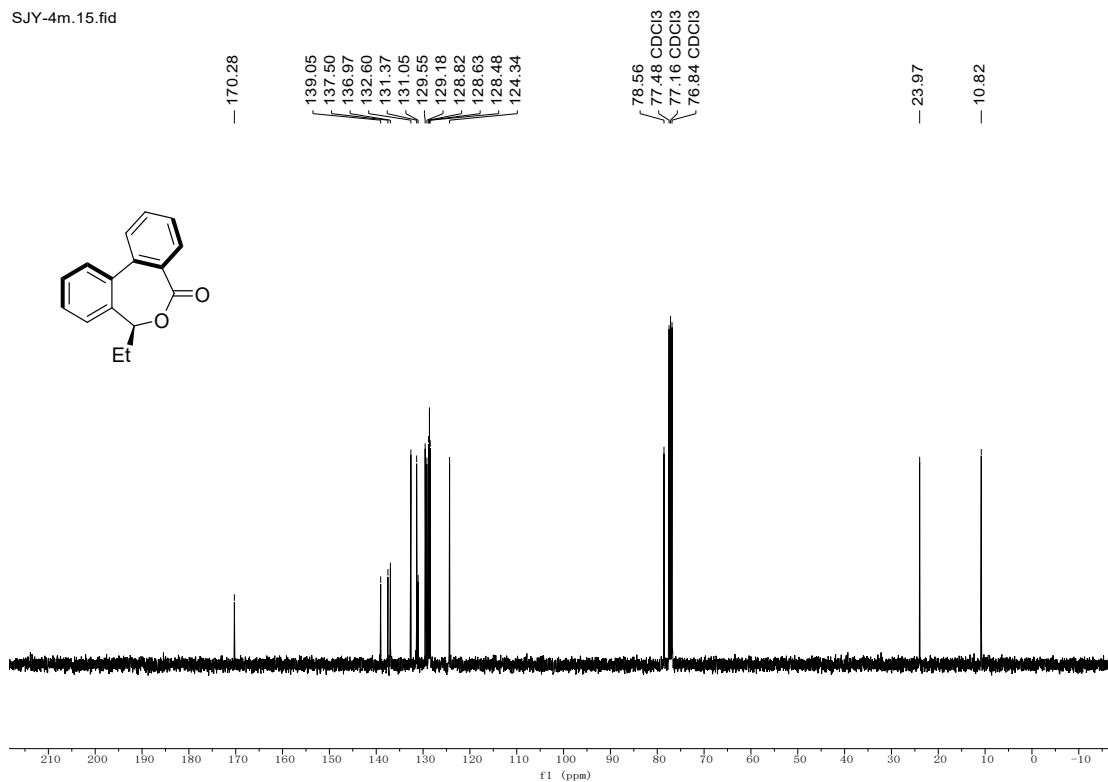

<sup>1</sup>H NMR (400 MHz, CDCl<sub>3</sub>) of compound 4n

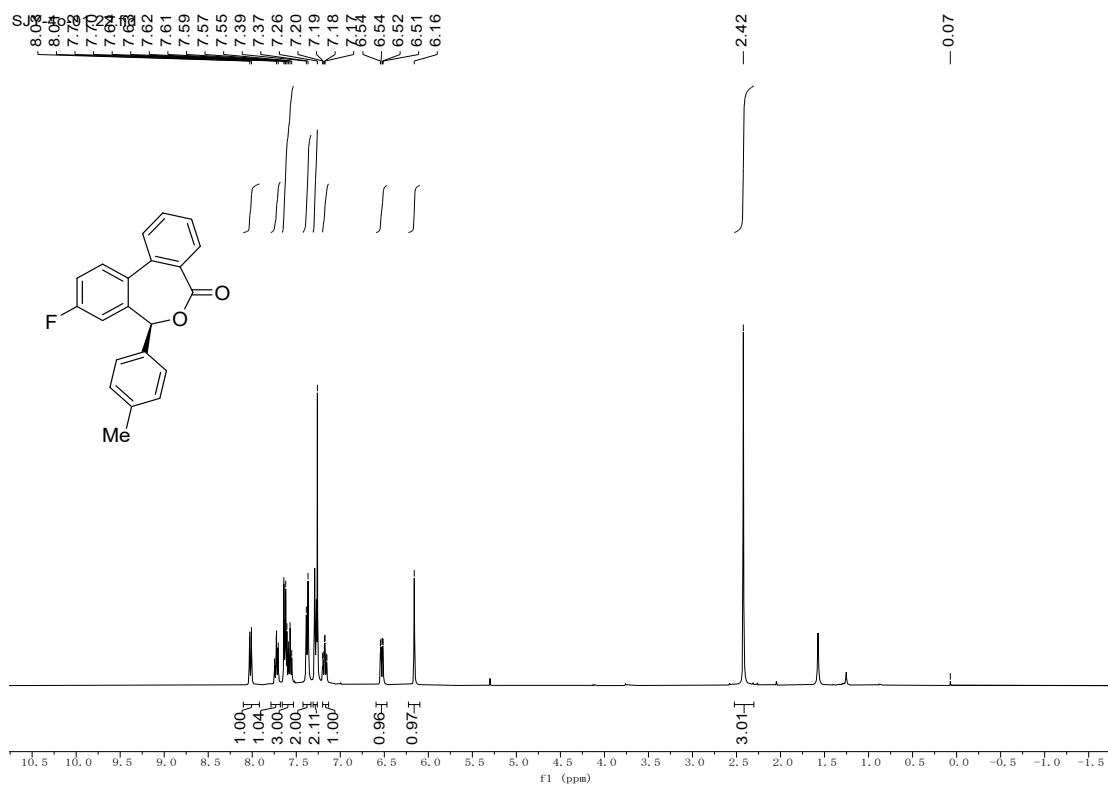

$^{13}\text{C}$  NMR (101 MHz,  $\text{CDCl}_3$ ) of compound **4n**

SJY-4o-01.21.fid

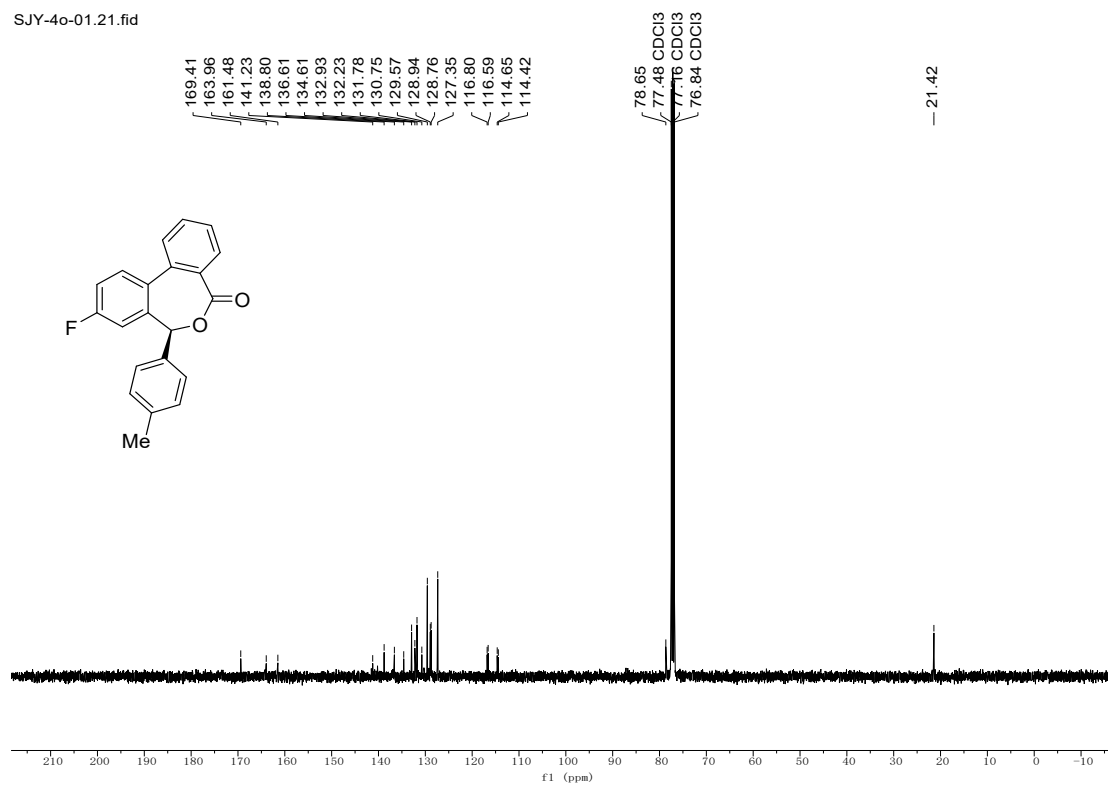

$^1\text{H}$  NMR (400 MHz,  $\text{CDCl}_3$ ) of compound **4o**



SJY-4o-1.10.fid

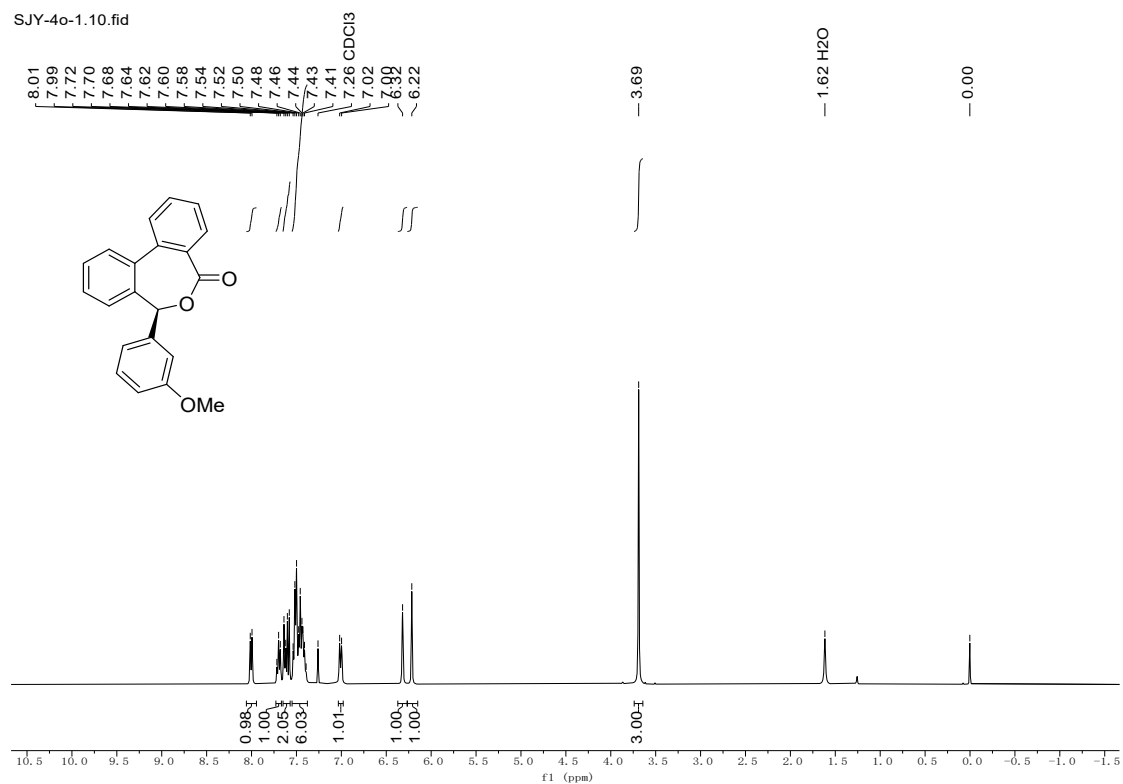

### $^{13}\text{C}$ NMR (101 MHz, $\text{CDCl}_3$ ) of compound 4o

SJY-4p.17.fid

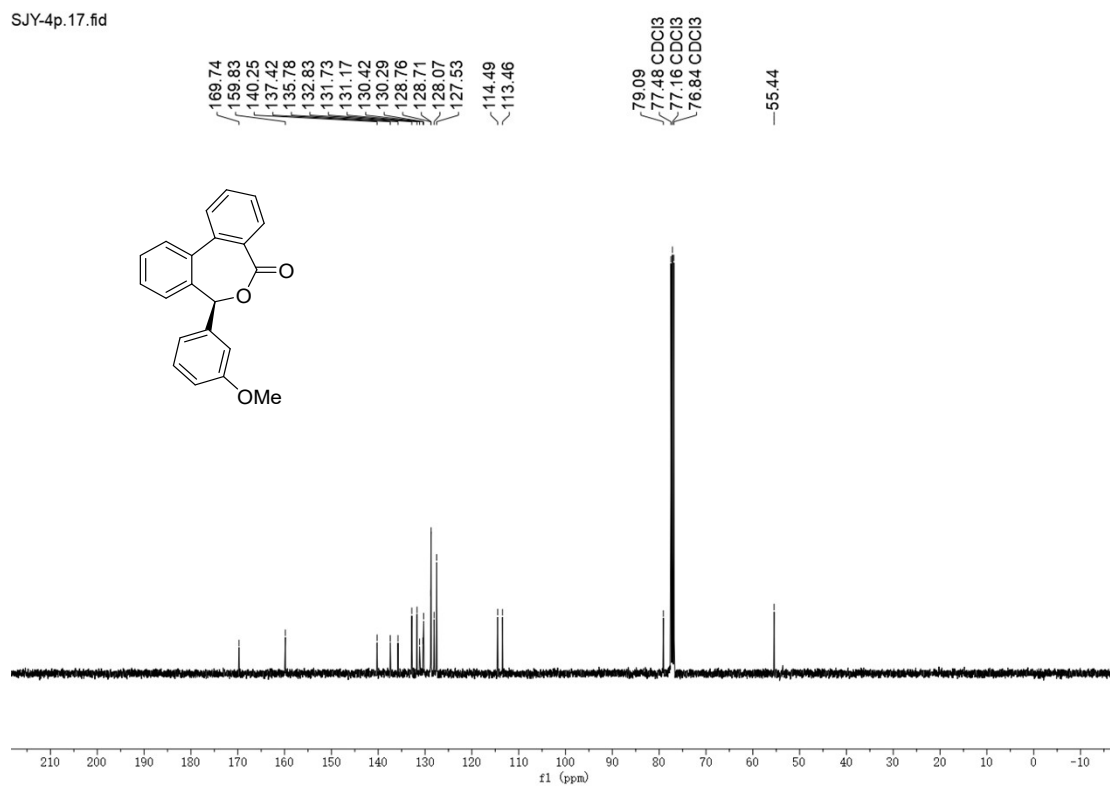

## 7. References

1. Y. Shi, X. Tan, S. Gao, Y. Zhang, J. Wang, X. Zhang and Q. Yin, *Org Lett*, 2020, **22**, 2707-2713.
2. P. Borowiecki, N. Telatycka, M. Tataruch, A. Żądło-Dobrowolska, T. Reiter, K. Schühle, J. Heider, M. Szaleniec and W. Kroutil, *Adv. Synth. Catal.*, 2020, **362**, 2012-2029.
3. Y. Zhang, Y. Q. Liu, L. Hu, X. Zhang and Q. Yin, *Org Lett*, 2020, **22**, 6479-6483.
